# Supplementary material for: Microbial Community Dynamics during Biodegradation of Crude Oil and Its Response to Biostimulation in Svalbard Seawater at Low Temperature
Source: MDPI journal article supplement (doi:10.3390/microorganisms9122425), 2021-11-24
Supplement: s1 [file s1]

# Microbial community dynamics during biodegradation of crude oil and its response to biostimulation in Svalbard seawater at low temperature

Hiie Nõlvak, Nga [Phuong Dang](#), Marika Truu, Angela Peeb, Kertu Tiirik, Megan O'Sadnick and Jaak Truu

## Supplementary File S2

### Supplementary tables

Table S1. The means and standard deviations of physicochemical characteristics of seawater (SW), oil-contaminated seawater (SWO), and biostimulated oil-contaminated seawater (SWOB).

Table S2. The characteristics of qPCR primer pairs and programs.

Table S3. The characteristics of metagenomic data of seawater (SW), oil-contaminated seawater (SWO), and biostimulated oil-contaminated seawater (SWOB).

Table S4. The characteristics of amplicon-based sequencing data of seawater (SW), oil-contaminated seawater (SWO), and biostimulated oil-contaminated seawater (SWOB).

Table S5. The means and standard deviations of *n*-C17/Pristane and *n*-C18/Phytane ratios and concentrations of PAHs in sterilized oil contaminated seawater (SWOs), oil contaminated seawater (SWO) and biostimulated oil contaminated seawater (SWOB).

Table S6. The mean abundances and standard deviations of 16S rRNA genes specific to bacteria, archaea, *Colwellia*, *Cycloclasticus*, and *Pseudomonas* in the seawater (SW), oil contaminated seawater (SWO) and biostimulated oil contaminated seawater (SWOB).

Table S7. Major bacterial phyla proportions based on taxonomic classification using Kaiju with NCBI-nr database in the seawater (SW), oil contaminated seawater (SWO) and biostimulated oil contaminated seawater (SWOB).

Table S8. Major bacterial phyla proportions based on taxonomic classification using Kaiju with MAR<sub>DB</sub> database in the seawater (SW), oil contaminated seawater (SWO) and biostimulated oil contaminated seawater (SWOB).

Table S9. Major bacterial phyla proportions based on taxonomic classification using Kraken2 with Standard Kraken2 database in the seawater (SW), oil contaminated seawater (SWO) and biostimulated oil contaminated seawater (SWOB).

Table S10. Major bacterial phyla proportions based on taxonomic classification using Bracken with Standard Kraken2 database in the seawater (SW), oil contaminated seawater (SWO) and biostimulated oil contaminated seawater (SWOB).

Table S11. The mean proportions and standard deviations of major bacterial phyla based on taxonomic classification using amplicon-based sequencing with SILVA database in the seawater (SW), oil contaminated seawater (SWO) and biostimulated oil contaminated seawater (SWOB).

Table S12. The proportions of the 50 predominant bacterial genera across all samples in seawater (SW), oil contaminated seawater (SWO), and biostimulated oil contaminated seawater (SWOB) according to taxonomic classification using Kaiju with the NCBI-nr database.

Table S13. The proportions of the 50 predominant bacterial genera across all samples in seawater (SW), oil contaminated seawater (SWO), and biostimulated oil contaminated seawater (SWOB) according to taxonomic classification using Kaiju with the MAR<sub>DB</sub> database.

Table S14. The proportions of the 50 predominant bacterial genera across all samples in seawater (SW), oil contaminated seawater (SWO), and biostimulated oil contaminated seawater (SWOB) according to taxonomic classification using Kraken2 with the Standard Kraken2 database.

Table S15. The proportions of the 50 predominant bacterial genera across all samples in seawater (SW), oil contaminated seawater (SWO), and biostimulated oil contaminated seawater (SWOB) according to taxonomic classification using Bracken with the Standard Kraken2 database.

Table S16. The mean proportions and standard deviations of the 50 predominant bacterial genera across all samples in seawater (SW), oil contaminated seawater (SWO), and biostimulated oil contaminated seawater (SWOB) according to taxonomic classification based on amplicon-sequencing and the SILVA database.

Table S17. The correlation between datasets of proportions of the 50 predominant bacterial genera and proportions of bacterial genera containing hydrocarbon degraders acquired with five different taxonomic classification methods.

Table S18. The proportions of the most abundant bacterial species (>1% of bacterial community in at least one treatment) in seawater (SW), oil contaminated seawater (SWO), and biostimulated oil contaminated seawater (SWOB).

Table S19. The number of detected genera, proportions and estimated abundances of bacterial genera involving petroleum hydrocarbon degraders in seawater (SW), oil contaminated seawater (SWO), and biostimulated oil contaminated seawater (SWOB) based on five taxonomic assignment methods.

Table S20. Normalized hydrocarbon degradation related gene abundances (RPKG) in seawater (SW), oil-contaminated seawater (SWO), and biostimulated oil-contaminated seawater (SWOB).

Table S21. Average nucleotide identity (ANI) score-based clustering of good quality (completeness >50%, contamination <10%) metagenome assembled genomes (MAGs) and their oil degradation gene profiles.

Table S22. Major operational taxonomic units (OTUs) of bacterial and archaeal genera found in seawater (SW), oil contaminated seawater (SWO), and biostimulated oil contaminated seawater (SWOB) after four and eight months of incubation according to amplicon-based sequencing.

### **Supplementary figures**

Fig. S1. The abundances of bacterial (A) and archaeal (B) communities, as well as the relative abundance of the archaeal community (C) in seawater (SW), oil contaminated seawater (SWO) and biostimulated oil contaminated seawater (SWOB).

Fig. S2. Venn diagram showing the overlap of detected genera containing oil hydrocarbon degraders between different taxonomic classification methods.

Fig. S3. The clustering of seawater (SW), oil contaminated seawater (SWO) and biostimulated oil contaminated seawater (SWOB) microcosms based on the crl-transformed proportions of the 50 predominant genera of Kaiju (A), Kaiju/MAR (B), Kraken2 (C), Bracken (D), and Amplicon (E) taxonomic classifications.

Fig. S4. Multiple co-inertia analysis results based on datasets of the top 50 bacterial genera proportions based on five taxonomic classification methods.

Fig. S5. Multiple co-inertia analysis results based on datasets of proportions of bacterial genera containing oil hydrocarbon degraders based on five taxonomic classification methods.

Fig. S6. The bacterial community structure at phylum, genus (>3%), and species (>3%) level in seawater (SW), oil-contaminated seawater (SWO), and biostimulated oil-contaminated seawater (SWOB).

Fig. S7. The proportions of archaeal phyla as well as the most dominant archaeal genera and species in the archaeal community according to Kaiju in seawater (SW), oil contaminated seawater (SWO) and biostimulated oil contaminated seawater (SWOB).

### **Supplementary texts**

Section S1: Prokaryotic Community Structure in Different Treatments According to Kaiju.

**Table S1.** The means and standard deviations (in parenthesis,  $n = 2$ ) of physicochemical characteristics of the seawater (SW), oil contaminated seawater (SWO) and biostimulated oil contaminated seawater (SWOB). The numbers in sample codes denote time in months. TOC – total organic carbon,  $N_{\text{tot}}$  – total nitrogen,  $P_{\text{tot}}$  – total phosphorous, NA – not analysed.

| Sample | T (°C)    | Salinity (ppt) | pH          | O <sub>2</sub> (mg/L) | TOC (mg/L)  | $N_{\text{tot}}$ (mg/L) | NH <sub>4</sub> -N (mg/L) | NO <sub>3</sub> -N (mg/L) | $P_{\text{tot}}$ (mg/L) |
|--------|-----------|----------------|-------------|-----------------------|-------------|-------------------------|---------------------------|---------------------------|-------------------------|
| SW0    | 2.0 (0.2) | 35.2 (0.3)     | 7.91 (0.04) | NA                    | 2.20 (0.17) | <0.5                    | 0.064 (0.014)             | 0.40 (0.10)               | 0.14 (0.02)             |
| SW4    | 4.0 (0.1) | 34.6 (1.5)     | 7.96 (0.20) | 10.5 (0.5)            | NA          | <1.0                    | 0.036 (0.002)             | 0.67 (0.03)               | <0.1                    |
| SWO4   | 4.0 (0.1) | 33.8 (1.4)     | 8.00 (0.20) | 10.5 (0.5)            | NA          | <1.0                    | 0.018 (0.001)             | 0.66 (0.03)               | <0.1                    |
| SWOB4  | 4.0 (0.1) | 35.2 (1.7)     | 6.82 (0.02) | 8.3 (0.4)             | 18.3 (1.0)  | 445 (2.0)               | 255 (1.00)                | 42.8 (2.00)               | 152 (5.0)               |
| SW8    | 4.0 (0.1) | 35.0 (1.5)     | 8.23 (0.20) | 11.8 (0.6)            | NA          | <0.5                    | 0.033 (0.002)             | <0.3                      | <0.1                    |
| SWO8   | 4.0 (0.1) | 34.6 (1.5)     | 8.16 (0.20) | NA                    | NA          | <0.5                    | 0.010 (0.001)             | <0.3                      | <0.1                    |
| SWOB8  | 4.0 (0.1) | 36.0 (1.7)     | 6.85 (0.02) | 10.6 (0.5)            | 18.0 (0.9)  | 487 (3.0)               | 262 (2.00)                | 22.0 (1.00)               | 105 (3.0)               |

**Table S2.** The characteristics of primer pairs and programs used in qPCR. LOQ – limit of quantification.

| Target gene                    | Primers   | Primer sequence 5'-3' | Amplicon size (bp) | Primer concentration (μM) | Amplification program                                                | LOQ (copies/mL water) | Primer reference  |
|--------------------------------|-----------|-----------------------|--------------------|---------------------------|----------------------------------------------------------------------|-----------------------|-------------------|
| Bacterial 16S rRNA             | Bact517F  | GCCAGCAGCCGCGGTAA     | 530                | 0.6                       | 95°C 10 min; 35 cycles: 95°C 30 s; 60°C 45 s; 72°C 45 s <sup>M</sup> | 50                    | [1]               |
|                                | Bact1028R | CGACARCCATGCASCACCT   |                    |                           |                                                                      |                       | [2]               |
| Archaeal 16S rRNA              | Arc519F   | CAGYCGCCRCGGTAA       | 393                | 0.6                       | 95°C 10 min; 35 cycles: 95°C 15 s; 56°C 30 s; 72°C 30 s <sup>M</sup> | 50                    | [3]               |
|                                | Arch910R  | GCYCCCCCGCCWATTC      |                    |                           |                                                                      |                       |                   |
| <i>Colwellia</i> 16S rRNA      | Col134F   | CCTTATGGTGGGGGACAACA  | 96                 | 0.6                       | 95°C 10 min; 35 cycles: 95°C 15 s; 56°C 30 s; 72°C 30 s <sup>M</sup> | 25                    | Modified from [4] |
|                                | Col209Rm  | AATCAAATGGCGARAGGTCC  |                    |                           |                                                                      |                       |                   |
| <i>Cycloclasticus</i> 16S rRNA | Cyc467F   | AACCTTAGGCCCTGACGT    | 128                | 0.6                       | 95°C 10 min; 40 cycles: 95°C 15 s; 54°C 30 s; 72°C 30 s <sup>M</sup> | 25                    | [5]               |
|                                | Cyc577R   | TGTTTAACCGCCTACGCG    |                    |                           |                                                                      |                       |                   |
| <i>Pseudomonas</i> 16S rRNA    | Ps-for    | GGTCTGAGAGGATGATCAGT  | 990                | 0.6                       | 95°C 10 min; 40 cycles: 95°C 30 s; 55°C 45 s; 72°C 45 s <sup>M</sup> | 25                    | [6]               |
|                                | Ps-rev    | TTAGCTCCACCTCGCGGC    |                    |                           |                                                                      |                       |                   |

<sup>M</sup> Immediately after the qPCR assay melting curve analysis was performed by increasing the temperature from 70 °C to 90 °C (0.35 °C/3 s) with continuous fluorescence recording.

**Table S3.** The number of total reads, reads after quality trimming, coverage and diversity metrics, the proportions of classified reads according to different taxonomic assignment methods (%), and the numbers of contigs in the metagenomes of seawater (SW), oil contaminated seawater (SWO) and biostimulated oil contaminated seawater (SWOB). The numbers in sample codes denote time in months.

| Sample | Number of total reads | Number of reads after quality trimming | Coverage | Diversity | Kaiju | Classified reads (%) |         |         | Contigs                  |
|--------|-----------------------|----------------------------------------|----------|-----------|-------|----------------------|---------|---------|--------------------------|
|        |                       |                                        |          |           |       | Kaiju/MAR            | Kraken2 | Bracken |                          |
| SW0    | 61252004              | 60751670                               | 0.774    | 18.85     | 67.6  | 74.5                 | 18.0    | 18.0    | 215103<br>(453660249 bp) |
| SW4    | 58800661              | 58762069                               | 0.968    | 17.55     | 72.7  | 71.3                 | 25.1    | 25.0    | 78017<br>(232006212 bp)  |
| SWO4   | 62447105              | 62411054                               | 0.990    | 17.87     | 88.3  | 85.3                 | 46.6    | 42.6    | 66796<br>(217880730 bp)  |
| SWOB4  | 55743647              | 54954391                               | 0.998    | 17.26     | 92.2  | 87.2                 | 62.1    | 62.1    | 23475<br>(113304343 bp)  |
| SW8    | 61429147              | 60960320                               | 0.968    | 18.29     | 78.2  | 72.1                 | 27.0    | 27.0    | 104532<br>(377477043 bp) |
| SWO8   | 57527324              | 57467303                               | 0.992    | 17.50     | 77.6  | 79.3                 | 37.6    | 37.6    | 67393<br>(205560027 bp)  |
| SWOB8  | 60566394              | 60529898                               | 1.000    | 16.37     | 91.0  | 84.4                 | 39.1    | 39.1    | 19588<br>(97474974 bp)   |

**Table S4.** The number of obtained good quality total, bacterial (Bact) and archaeal (Arch) 16S rRNA gene sequences of amplicon-based sequencing, as well as the coverage estimates, number of operational taxonomic units (OTUs) and diversity indices (1/S - Inverse Simpson index, SH – Shannon diversity index) of bacterial community in the seawater (SW), oil contaminated seawater (SWO) and biostimulated oil contaminated seawater (SWOB). The first number in sample codes denotes time in months and the second number denotes treatment parallel.

| Sample | No of sequences |       |      | Coverage | No of OTUs | Diversity indices |         |
|--------|-----------------|-------|------|----------|------------|-------------------|---------|
|        | Total           | Bact  | Arch | Bact     | Bact       | 1/S Bact          | SH Bact |
| SW0.1  | 42827           | 41033 | 1794 | 0.981    | 1365       | 12.38             | 4.27    |
| SW0.2  | 43248           | 41105 | 2143 | 0.982    | 1312       | 12.52             | 4.27    |
| SW4.1  | 45895           | 45837 | 58   | 0.979    | 1280       | 19.48             | 4.21    |
| SW4.2  | 25449           | 25375 | 74   | 0.976    | 1603       | 30.93             | 4.52    |

| Sample  | No of sequences |        |      | Coverage | No of OTUs | Diversity indices |         |
|---------|-----------------|--------|------|----------|------------|-------------------|---------|
|         | Total           | Bact   | Arch | Bact     | Bact       | 1/S Bact          | SH Bact |
| SWO4.1  | 30636           | 30527  | 109  | 0.974    | 1654       | 9.97              | 4.01    |
| SWO4.2  | 74275           | 74156  | 119  | 0.980    | 1078       | 2.86              | 2.53    |
| SWOB4.1 | 43632           | 43549  | 83   | 0.976    | 1520       | 10.38             | 3.81    |
| SWOB4.2 | 37753           | 37691  | 62   | 0.977    | 1391       | 11.62             | 3.78    |
| SW8.1   | 53601           | 53551  | 50   | 0.977    | 1501       | 3.69              | 3.20    |
| SW8.2   | 54580           | 54539  | 41   | 0.977    | 1596       | 17.23             | 4.32    |
| SWO8.1  | 80806           | 80680  | 126  | 0.977    | 1468       | 8.67              | 3.58    |
| SWO8.2  | 106585          | 106443 | 142  | 0.978    | 1345       | 4.57              | 2.96    |
| SWOB8.1 | 101981          | 101889 | 92   | 0.976    | 1701       | 15.37             | 4.16    |
| SWOB8.2 | 54652           | 54617  | 35   | 0.977    | 1656       | 8.78              | 3.77    |

**Table S5.** The mean and standard deviations (in parenthesis,  $n = 2$ ) of  $n$ -C17/Pristane and  $n$ -C18/Phytane ratios and concentrations ( $\mu\text{g/L}$ ) of polyaromatic hydrocarbons (PAH) in sterilized oil contaminated seawater (SWOs), oil contaminated seawater (SWO) and biostimulated oil contaminated seawater (SWOB). The numbers in sample codes denote time in months.

|                   |                    | SWOs/SWO/<br>SWOB 0 | SWOs4         | SWOs8        | SWO4          | SWO8         | SWOB4        | SWOB8        |
|-------------------|--------------------|---------------------|---------------|--------------|---------------|--------------|--------------|--------------|
|                   |                    | Ratios              |               |              |               |              |              |              |
|                   | $n$ -C17/Pristane  | 0.25 (0.07)         | 0.25 (0.07)   | 0.20 (0.06)  | 0.25 (0.07)   | 0.20 (0.02)  | 0.20 (0.04)  | 0.10 (0.01)  |
|                   | $n$ -C18/Phytane   | 0.40 (0.14)         | 0.40 (0.14)   | 0.30 (0.10)  | 0.40 (0.14)   | 0.30 (0.10)  | 0.10 (0.02)  | 0 (0)        |
|                   |                    | PAH concentrations  |               |              |               |              |              |              |
| 2-<br>ring        | Naphthalene        | 6465 (582)          | 2346.92 (211) | 1092.98 (98) | 1845.32 (166) | 927.14 (83)  | 26.21 (2.4)  | 19.80 (2)    |
| 3-<br>ring        | Acenaphthylene     | 4.55 (0.4)          | 3.42 (0.3)    | 5.60 (0.5)   | 3.53 (0.3)    | 1.49 (0.1)   | 3.13 (0.3)   | 3.94 (0.4)   |
|                   | Acenaphthene       | 355 (32)            | 132.53 (12)   | 163.85 (15)  | 137.96 (12)   | 174.47 (16)  | 150.72 (14)  | 96.78 (9)    |
|                   | Fluorene           | 1169 (105)          | 528.19 (47.5) | 525.85 (47)  | 544.00 (49)   | 602.74 (54)  | 584.28 (53)  | 276.08 (25)  |
|                   | Phenanthrene       | 1745 (105)          | 1383.49 (83)  | 1062.98 (64) | 1333.38 (80)  | 1284.70 (77) | 1644.95 (99) | 675.81 (41)  |
|                   | Anthracene         | 19.2 (1.2)          | 34.15 (2.0)   | 16.59 (1)    | 52.61 (3)     | 23.34 (1.4)  | 37.61 (2)    | 9.23 (0.6)   |
| $\geq$ 4-<br>ring | Fluoranthene       | 152 (9.1)           | 135.87 (8.2)  | 103.86 (6)   | 150.62 (9)    | 110.05 (7)   | 143.58 (9)   | 106.17 (6)   |
|                   | Pyrene             | 161 (6.4)           | 132.53 (5.3)  | 112.52 (4.5) | 150.37 (6)    | 122.08 (5)   | 134.48 (5.4) | 110.81 (4)   |
|                   | Benzo(a)anthracene | 30 (1.2)            | 14.46 (0.6)   | 14.29 (0.5)  | 11.82 (0.5)   | 24.39 (1)    | 28.23 (1)    | 24.87 (1)    |
|                   | Chrysene           | 174 (7.0)           | 83.15 (3.3)   | 109.14 (4.4) | 87.65 (3.5)   | 174.17 (7)   | 128.65 (5)   | 138.16 (5.5) |

|                        | SWO <sub>s</sub> /SWO/<br>SWOB 0 | SWO <sub>s</sub> 4 | SWO <sub>s</sub> 8 | SWO4        | SWO8        | SWOB4       | SWOB8       |
|------------------------|----------------------------------|--------------------|--------------------|-------------|-------------|-------------|-------------|
| Benzo(b)fluoranthene   | 50.9 (2.0)                       | 34.14 (1.4)        | 30.83 (1)          | 31.39 (1.3) | 45.85 (2)   | 43.31 (2)   | 48.05 (2)   |
| Benzo(k)fluoranthene   | 8.35 (0.3)                       | 6.06 (0.2)         | 6.96 (0.3)         | 5.40 (0.2)  | 10.04 (0.4) | 6.96 (0.3)  | 6.35 (0.3)  |
| Benzo(a)pyrene         | 30.2 (1.2)                       | 20.29 (0.8)        | 17.88 (0.7)        | 19.75 (0.8) | 21.23 (0.8) | 26.10 (1)   | 19.55 (0.8) |
| Indeno(1,2,3-cd)pyrene | 8.01 (0.3)                       | 6.67 (0.3)         | 5.12 (0.2)         | 6.19 (0.2)  | 7.77 (0.3)  | 8.17 0.3)   | 8.48 (0.3)  |
| Benzo(ghi)perylene     | 24.2 (1.0)                       | 15.20 (0.6)        | 14.76 (0.6)        | 14.16 (0.6) | 20.36 (0.8) | 19.70 (0.8) | 19.86 (0.8) |
| Dibenzo(a,h)anthracene | 5.99 (0.2)                       | 4.26 (0.2)         | 4.02 (0.2)         | 3.03 (0.1)  | 6.31 (0.2)  | 4.39 (0.2)  | 6.01 (0.2)  |

**Table S6.** The mean abundances and standard deviations (in parenthesis,  $n = 2$ ) of 16S rRNA genes specific to bacteria (B16S), archaea (A16S), *Colwellia*, *Cycloclasticus*, and *Pseudomonas* in the seawater (SW), oil contaminated seawater (SWO) and biostimulated oil contaminated seawater (SWOB). The numbers in sample codes denote time in months. NA – not analysed.

| Target gene                    | SW0                                          | SW4                                          | SW8                                          | SWO4                                         | SWO8                                         | SWOB4                                        | SWOB8                                        |
|--------------------------------|----------------------------------------------|----------------------------------------------|----------------------------------------------|----------------------------------------------|----------------------------------------------|----------------------------------------------|----------------------------------------------|
| B16S                           | $1.02 \times 10^6$<br>( $0.05 \times 10^6$ ) | $3.72 \times 10^6$<br>( $1.05 \times 10^6$ ) | $5.23 \times 10^6$<br>( $3.52 \times 10^6$ ) | $2.90 \times 10^6$<br>( $1.49 \times 10^6$ ) | $4.59 \times 10^6$<br>( $1.18 \times 10^6$ ) | $8.28 \times 10^7$<br>( $1.04 \times 10^7$ ) | $1.24 \times 10^8$<br>( $0.24 \times 10^8$ ) |
| A16S                           | $1.83 \times 10^5$<br>( $0.71 \times 10^5$ ) | $1.89 \times 10^4$<br>( $0.77 \times 10^4$ ) | $3.37 \times 10^4$<br>( $4.14 \times 10^4$ ) | $5.46 \times 10^4$<br>( $0.59 \times 10^4$ ) | $1.01 \times 10^5$<br>( $0.38 \times 10^5$ ) | $2.63 \times 10^4$<br>( $1.99 \times 10^4$ ) | $3.35 \times 10^4$<br>( $1.58 \times 10^4$ ) |
| <i>Colwellia</i> 16S rRNA      | NA                                           | NA                                           | $5.26 \times 10^5$<br>( $6.79 \times 10^5$ ) | NA                                           | $6.01 \times 10^5$<br>( $9.59 \times 10^4$ ) | $6.68 \times 10^5$<br>( $5.25 \times 10^5$ ) | $4.53 \times 10^5$<br>( $3.58 \times 10^5$ ) |
| <i>Cycloclasticus</i> 16S rRNA | NA                                           | NA                                           | $9.51 \times 10^3$<br>( $1.37 \times 10^3$ ) | NA                                           | $4.74 \times 10^2$<br>( $1.07 \times 10^2$ ) | $1.25 \times 10^5$<br>( $1.75 \times 10^5$ ) | $9.35 \times 10^6$<br>( $1.07 \times 10^6$ ) |
| <i>Pseudomonas</i> 16S rRNA    | NA                                           | NA                                           | $1.64 \times 10^5$<br>( $1.74 \times 10^5$ ) | NA                                           | $2.25 \times 10^5$<br>( $3.29 \times 10^3$ ) | $7.95 \times 10^6$<br>( $2.10 \times 10^6$ ) | $1.17 \times 10^7$<br>( $4.27 \times 10^6$ ) |

**Table S7.** Major (the 20 most abundant in each sample) bacterial phyla proportions (%) based on taxonomic classification using Kaiju with the NCBI-nr database in the seawater (SW), oil contaminated seawater (SWO) and biostimulated oil contaminated seawater (SWOB). The numbers in sample codes denote time in months.

| Phylum                | Class                      | SW0   | SW4   | SW8   | SWO4  | SWO8  | SWOB4 | SWOB8 |
|-----------------------|----------------------------|-------|-------|-------|-------|-------|-------|-------|
| <i>Proteobacteria</i> |                            | 82.33 | 79.08 | 69.84 | 73.33 | 76.82 | 90.30 | 94.52 |
|                       | <i>Alphaproteobacteria</i> | 19.82 | 11.15 | 14.20 | 36.06 | 18.57 | 6.75  | 16.72 |
|                       | <i>Betaproteobacteria</i>  | 3.87  | 3.53  | 3.96  | 1.16  | 1.28  | 1.41  | 1.82  |

| Phylum                     | Class                        | SW0   | SW4   | SW8   | SW04  | SW08  | SW0B4 | SW0B8 |
|----------------------------|------------------------------|-------|-------|-------|-------|-------|-------|-------|
|                            | <i>Gammaproteobacteria</i>   | 52.94 | 60.54 | 48.20 | 34.94 | 55.41 | 80.58 | 74.46 |
|                            | <i>Deltaproteobacteria</i>   | 2.14  | 2.11  | 1.32  | 0.28  | 0.46  | 0.13  | 0.27  |
|                            | <i>Epsilonproteobacteria</i> | 0.19  | 0.22  | 0.19  | 0.08  | 0.26  | 0.06  | 0.11  |
| <i>Bacteroidetes</i>       |                              | 3.23  | 13.63 | 22.47 | 23.31 | 15.26 | 7.35  | 3.88  |
| <i>Planctomycetes</i>      |                              | 1.79  | 1.71  | 3.12  | 0.86  | 4.32  | 0.049 | 0.08  |
| <i>Firmicutes</i>          |                              | 1.98  | 2.38  | 1.22  | 1.20  | 0.97  | 1.76  | 0.71  |
| <i>Actinobacteria</i>      |                              | 2.90  | 1.35  | 1.06  | 0.56  | 0.99  | 0.31  | 0.40  |
| <i>Verrucomicrobia</i>     |                              | 2.13  | 0.18  | 0.49  | 0.10  | 0.21  | 0.02  | 0.03  |
| <i>Chloroflexi</i>         |                              | 1.75  | 0.19  | 0.19  | 0.07  | 0.13  | 0.02  | 0.05  |
| <i>Cyanobacteria</i>       |                              | 0.40  | 0.30  | 0.36  | 0.14  | 0.52  | 0.06  | 0.09  |
| <i>Acidobacteria</i>       |                              | 0.45  | 0.23  | 0.26  | 0.11  | 0.16  | 0.02  | 0.04  |
| <i>Gemmatimonadetes</i>    |                              | 0.51  | 0.06  | 0.06  | 0.02  | 0.05  | <0.01 | 0.01  |
| <i>Nitrospinae</i>         |                              | 0.55  | 0.01  | 0.04  | 0.03  | 0.02  | <0.01 | 0.01  |
| <i>Ca. Marinimicrobia</i>  |                              | 0.56  | 0.02  | 0.03  | 0.01  | 0.03  | <0.01 | <0.01 |
| <i>Spirochaetes</i>        |                              | 0.15  | 0.09  | 0.08  | 0.03  | 0.05  | 0.01  | 0.02  |
| <i>Nitrospirae</i>         |                              | 0.11  | 0.08  | 0.07  | 0.03  | 0.04  | 0.01  | 0.02  |
| <i>Balneolaeota</i>        |                              | 0.05  | 0.02  | 0.10  | 0.02  | 0.05  | <0.01 | 0.01  |
| <i>Ca. Rokubacteria</i>    |                              | 0.08  | 0.04  | 0.04  | 0.01  | 0.01  | <0.01 | 0.01  |
| <i>Ignavibacteriae</i>     |                              | 0.04  | 0.03  | 0.03  | 0.01  | 0.02  | <0.01 | 0.01  |
| <i>Deinococcus-Thermus</i> |                              | 0.04  | 0.03  | 0.03  | 0.01  | 0.02  | <0.01 | 0.01  |
| <i>Calditrichaeota</i>     |                              | 0.06  | 0.03  | 0.03  | 0.01  | 0.02  | <0.01 | <0.01 |
| <i>Chlorobi</i>            |                              | 0.03  | 0.03  | 0.03  | 0.01  | 0.01  | <0.01 | 0.01  |
| <i>Lentisphaerae</i>       |                              | 0.06  | 0.02  | 0.02  | 0.01  | 0.02  | <0.01 | <0.01 |
| <i>Chlamydiae</i>          |                              | 0.03  | 0.05  | 0.01  | 0.01  | 0.01  | <0.01 | <0.01 |
| <i>Ca. Omnitrophica</i>    |                              | 0.04  | 0.02  | 0.03  | 0.01  | 0.01  | <0.01 | <0.01 |
| <i>Ca. Tectomicrobia</i>   |                              | 0.06  | 0.01  | 0.02  | 0.01  | 0.01  | <0.01 | <0.01 |
| <i>Armatimonadetes</i>     |                              | 0.03  | 0.02  | 0.02  | 0.01  | 0.02  | <0.01 | <0.01 |
| <i>Tenericutes</i>         |                              | 0.02  | 0.06  | 0.02  | <0.01 | 0.01  | <0.01 | <0.01 |
| <i>Ca. Dadabacteria</i>    |                              | 0.05  | 0.01  | 0.01  | <0.01 | 0.01  | <0.01 | <0.01 |
| <i>Ca. Poribacteria</i>    |                              | 0.06  | <0.01 | <0.01 | <0.01 | <0.01 | <0.01 | <0.01 |
| <i>Aquificae</i>           |                              | 0.02  | 0.01  | 0.01  | <0.01 | 0.01  | <0.01 | <0.01 |
| <i>Thermotogae</i>         |                              | 0.02  | <0.01 | <0.01 | <0.01 | 0.01  | <0.01 | <0.01 |



| Phylum                     | Class | SW0   | SW4   | SW8   | SW04  | SW08 | SW0B4 | SW0B8 |
|----------------------------|-------|-------|-------|-------|-------|------|-------|-------|
| <i>Ca. Melainabacteria</i> |       | 0.01  | 0.01  | 0.01  | <0.01 | 0.01 | <0.01 | <0.01 |
| <i>Deferribacteres</i>     |       | <0.01 | <0.01 | <0.01 | <0.01 | 0.01 | <0.01 | <0.01 |

**Table S8.** Major (the 20 most abundant in each sample) bacterial phyla proportions (%) based on taxonomic classification using Kaiju with the MAR<sub>DB</sub> database in the seawater (SW), oil contaminated seawater (SWO) and biostimulated oil contaminated seawater (SWOB). The numbers in sample codes denote time in months.

| Phylum                    | Class                        | SW0   | SW4   | SW8   | SW04  | SW08  | SW0B4 | SW0B8 |
|---------------------------|------------------------------|-------|-------|-------|-------|-------|-------|-------|
| <i>Proteobacteria</i>     |                              | 84.94 | 82.15 | 73.64 | 74.21 | 75.20 | 91.20 | 94.17 |
|                           | <i>Alphaproteobacteria</i>   | 12.58 | 11.94 | 15.47 | 37.17 | 17.38 | 8.90  | 19.61 |
|                           | <i>Betaproteobacteria</i>    | 0.53  | 1.31  | 2.45  | 0.31  | 0.30  | 0.70  | 1.30  |
|                           | <i>Gammaproteobacteria</i>   | 67.20 | 64.65 | 51.17 | 35.19 | 55.77 | 79.54 | 70.35 |
|                           | <i>Deltaproteobacteria</i>   | 2.01  | 2.16  | 1.11  | 0.30  | 0.34  | 0.29  | 0.54  |
|                           | <i>Epsilonproteobacteria</i> | 0.05  | 0.14  | 0.13  | 0.15  | 0.25  | 0.08  | 0.14  |
| <i>Bacteroidetes</i>      |                              | 2.51  | 13.30 | 19.95 | 22.67 | 14.46 | 7.90  | 4.27  |
| <i>Planctomycetes</i>     |                              | 1.96  | 1.74  | 3.77  | 1.58  | 8.70  | 0.09  | 0.18  |
| <i>Actinobacteria</i>     |                              | 1.59  | 0.96  | 0.50  | 0.42  | 0.36  | 0.33  | 0.51  |
| <i>Verrucomicrobia</i>    |                              | 2.26  | 0.36  | 0.62  | 0.11  | 0.21  | 0.05  | 0.09  |
| <i>Chloroflexi</i>        |                              | 2.22  | 0.19  | 0.17  | 0.07  | 0.10  | 0.04  | 0.08  |
| <i>Cyanobacteria</i>      |                              | 0.26  | 0.31  | 0.28  | 0.41  | 0.31  | 0.11  | 0.18  |
| <i>Ca. Marinimicrobia</i> |                              | 1.42  | 0.09  | 0.11  | 0.04  | 0.10  | 0.02  | 0.04  |
| <i>Gemmatimonadetes</i>   |                              | 1.39  | 0.10  | 0.13  | 0.04  | 0.08  | 0.01  | 0.03  |
| <i>Firmicutes</i>         |                              | 0.15  | 0.28  | 0.22  | 0.10  | 0.13  | 0.12  | 0.20  |
| <i>Nitrospinae</i>        |                              | 0.69  | 0.03  | 0.05  | 0.04  | 0.03  | 0.01  | 0.01  |
| <i>Acidobacteria</i>      |                              | 0.20  | 0.07  | 0.07  | 0.13  | 0.06  | 0.01  | 0.02  |
| <i>Nitrospirae</i>        |                              | 0.04  | 0.06  | 0.06  | 0.02  | 0.02  | 0.01  | 0.04  |
| <i>Aquificae</i>          |                              | 0.04  | 0.02  | 0.04  | 0.03  | 0.05  | 0.03  | 0.03  |
| <i>Spirochaetes</i>       |                              | 0.06  | 0.05  | 0.05  | 0.02  | 0.02  | 0.01  | 0.02  |
| <i>Balneolaeota</i>       |                              | 0.01  | 0.02  | 0.07  | 0.01  | 0.04  | 0.01  | 0.01  |
| <i>Ca. Poribacteria</i>   |                              | 0.05  | 0.02  | 0.03  | 0.01  | 0.02  | <0.01 | <0.01 |
| <i>Ca. Tectomicrobia</i>  |                              | 0.02  | 0.02  | 0.02  | 0.01  | 0.01  | 0.01  | 0.01  |

| Phylum                       | Class | SW0   | SW4  | SW8  | SW04  | SW08 | SW0B4 | SW0B8 |
|------------------------------|-------|-------|------|------|-------|------|-------|-------|
| <i>Ignavibacteriae</i>       |       | 0.01  | 0.02 | 0.03 | 0.01  | 0.01 | <0.01 | 0.01  |
| <i>Lentisphaerae</i>         |       | 0.02  | 0.02 | 0.02 | 0.01  | 0.01 | <0.01 | 0.01  |
| <i>Kiritimatiellaeota</i>    |       | 0.02  | 0.02 | 0.02 | 0.01  | 0.01 | <0.01 | 0.01  |
| <i>Chlorobi</i>              |       | 0.01  | 0.02 | 0.02 | 0.01  | 0.01 | 0.01  | 0.01  |
| <i>Thermodesulfobacteria</i> |       | <0.01 | 0.01 | 0.01 | 0.01  | 0.02 | 0.01  | 0.01  |
| <i>Ca. Kaiserbacteria</i>    |       | 0.01  | 0.01 | 0.01 | 0.01  | 0.01 | <0.01 | <0.01 |
| <i>Thermotogae</i>           |       | 0.01  | 0.01 | 0.01 | <0.01 | 0.01 | <0.01 | 0.01  |

**Table S9.** Major (the 20 most abundant in each sample) bacterial phyla proportions (%) based on taxonomic classification using Kraken2 with the Standard Kraken2 database in the seawater (SW), oil contaminated seawater (SWO) and biostimulated oil contaminated seawater (SWOB). The numbers in sample codes denote time in months.

| Phylum                     | Class                        | SW0   | SW4   | SW8   | SW04  | SW08  | SW0B4 | SW0B8 |
|----------------------------|------------------------------|-------|-------|-------|-------|-------|-------|-------|
| <i>Proteobacteria</i>      |                              | 83.67 | 75.31 | 57.52 | 67.27 | 80.49 | 92.69 | 93.33 |
|                            | <i>Alphaproteobacteria</i>   | 15.35 | 12.71 | 14.85 | 23.08 | 10.69 | 5.25  | 18.65 |
|                            | <i>Betaproteobacteria</i>    | 3.39  | 4.21  | 3.21  | 2.14  | 4.69  | 1.21  | 3.89  |
|                            | <i>Gammaproteobacteria</i>   | 61.06 | 54.69 | 36.42 | 39.85 | 63.18 | 85.12 | 67.87 |
|                            | <i>Deltaproteobacteria</i>   | 0.46  | 0.62  | 0.44  | 0.24  | 0.16  | 0.08  | 0.28  |
|                            | <i>Epsilonproteobacteria</i> | 0.60  | 0.30  | 0.37  | 0.14  | 0.28  | 0.07  | 0.16  |
| <i>Bacteroidetes</i>       |                              | 4.31  | 15.64 | 33.66 | 28.10 | 15.91 | 4.43  | 3.87  |
| <i>Firmicutes</i>          |                              | 7.20  | 6.12  | 5.56  | 2.75  | 2.19  | 2.29  | 1.47  |
| <i>Actinobacteria</i>      |                              | 2.42  | 1.70  | 1.60  | 1.35  | 0.69  | 0.40  | 0.87  |
| <i>Cyanobacteria</i>       |                              | 0.92  | 0.50  | 0.40  | 0.18  | 0.24  | 0.09  | 0.19  |
| <i>Planctomycetes</i>      |                              | 0.50  | 0.23  | 0.76  | 0.14  | 0.26  | 0.02  | 0.07  |
| <i>Tenericutes</i>         |                              | 0.22  | 0.06  | 0.09  | 0.02  | 0.04  | 0.01  | 0.02  |
| <i>Spirochaetes</i>        |                              | 0.10  | 0.08  | 0.06  | 0.03  | 0.03  | 0.01  | 0.03  |
| <i>Verrucomicrobia</i>     |                              | 0.10  | 0.04  | 0.05  | 0.03  | 0.02  | 0.01  | 0.02  |
| <i>Fusobacteria</i>        |                              | 0.08  | 0.05  | 0.07  | 0.01  | 0.02  | <0.01 | 0.01  |
| <i>Deinococcus-Thermus</i> |                              | 0.04  | 0.06  | 0.04  | 0.03  | 0.01  | 0.01  | 0.02  |
| <i>Chloroflexi</i>         |                              | 0.07  | 0.05  | 0.03  | 0.01  | 0.02  | 0.01  | 0.02  |
| <i>Acidobacteria</i>       |                              | 0.07  | 0.03  | 0.03  | 0.02  | 0.01  | 0.01  | 0.02  |
| <i>Thermotogae</i>         |                              | 0.05  | 0.02  | 0.02  | 0.01  | 0.01  | <0.01 | 0.01  |

| Phylum                       | Class | SW0   | SW4   | SW8   | SW04  | SW08  | SW0B4 | SW0B8 |
|------------------------------|-------|-------|-------|-------|-------|-------|-------|-------|
| <i>Chlorobi</i>              |       | 0.03  | 0.02  | 0.02  | 0.01  | 0.01  | <0.01 | 0.02  |
| <i>Aquificae</i>             |       | 0.05  | 0.01  | 0.01  | <0.01 | 0.01  | <0.01 | <0.01 |
| <i>Chlamydiae</i>            |       | 0.03  | 0.01  | 0.01  | <0.01 | 0.01  | <0.01 | 0.01  |
| <i>Gemmatimonadetes</i>      |       | 0.02  | 0.01  | 0.01  | 0.01  | <0.01 | <0.01 | <0.01 |
| <i>Thermodesulfobacteria</i> |       | 0.03  | 0.01  | 0.01  | <0.01 | 0.01  | <0.01 | <0.01 |
| <i>Nitrospirae</i>           |       | 0.01  | 0.01  | 0.01  | 0.01  | 0.01  | <0.01 | <0.01 |
| <i>Deferribacteres</i>       |       | 0.01  | 0.01  | 0.01  | <0.01 | <0.01 | <0.01 | <0.01 |
| <i>Synergistetes</i>         |       | 0.01  | <0.01 | <0.01 | <0.01 | <0.01 | <0.01 | <0.01 |
| <i>Chrysiogenetes</i>        |       | <0.01 | <0.01 | <0.01 | <0.01 | <0.01 | <0.01 | <0.01 |

**Table S10.** Major (the 20 most abundant in each sample) bacterial phyla proportions (%) based on taxonomic classification using Bracken with the Standard Kraken2 database in the seawater (SW), oil contaminated seawater (SWO) and biostimulated oil contaminated seawater (SWOB). The numbers in sample codes denote time in months.

| Phylum                     | Class                        | SW0   | SW4   | SW8   | SW04  | SW08  | SW0B4 | SW0B8 |
|----------------------------|------------------------------|-------|-------|-------|-------|-------|-------|-------|
| <i>Proteobacteria</i>      |                              | 81.90 | 75.88 | 57.04 | 67.21 | 79.90 | 92.40 | 93.18 |
|                            | <i>Alphaproteobacteria</i>   | 14.44 | 12.08 | 14.41 | 22.53 | 10.55 | 5.16  | 18.41 |
|                            | <i>Betaproteobacteria</i>    | 3.58  | 4.11  | 3.45  | 2.36  | 4.82  | 1.25  | 3.90  |
|                            | <i>Gammaproteobacteria</i>   | 62.77 | 58.72 | 38.24 | 41.92 | 64.06 | 85.84 | 70.38 |
|                            | <i>Deltaproteobacteria</i>   | 0.43  | 0.59  | 0.43  | 0.23  | 0.16  | 0.08  | 0.28  |
|                            | <i>Epsilonproteobacteria</i> | 0.57  | 0.29  | 0.37  | 0.14  | 0.28  | 0.07  | 0.16  |
| <i>Bacteroidetes</i>       |                              | 4.06  | 14.88 | 32.66 | 27.33 | 15.60 | 4.35  | 3.82  |
| <i>Firmicutes</i>          |                              | 9.36  | 6.41  | 7.08  | 3.60  | 3.10  | 2.66  | 1.70  |
| <i>Actinobacteria</i>      |                              | 2.34  | 1.64  | 1.57  | 1.32  | 0.69  | 0.40  | 0.87  |
| <i>Cyanobacteria</i>       |                              | 0.90  | 0.49  | 0.40  | 0.19  | 0.24  | 0.10  | 0.19  |
| <i>Planctomycetes</i>      |                              | 0.47  | 0.22  | 0.74  | 0.13  | 0.26  | 0.02  | 0.07  |
| <i>Tenericutes</i>         |                              | 0.21  | 0.06  | 0.08  | 0.02  | 0.04  | 0.01  | 0.02  |
| <i>Spirochaetes</i>        |                              | 0.09  | 0.07  | 0.06  | 0.03  | 0.03  | 0.01  | 0.02  |
| <i>Acidobacteria</i>       |                              | 0.13  | 0.03  | 0.03  | 0.02  | 0.02  | 0.01  | 0.02  |
| <i>Verrucomicrobia</i>     |                              | 0.09  | 0.03  | 0.05  | 0.03  | 0.02  | 0.01  | 0.02  |
| <i>Fusobacteria</i>        |                              | 0.08  | 0.05  | 0.06  | 0.01  | 0.02  | <0.01 | 0.01  |
| <i>Deinococcus-Thermus</i> |                              | 0.04  | 0.06  | 0.04  | 0.03  | 0.01  | 0.01  | 0.02  |

| Phylum                       | Class | SW0   | SW4   | SW8   | SW04  | SW08  | SW0B4 | SW0B8 |
|------------------------------|-------|-------|-------|-------|-------|-------|-------|-------|
| <i>Chloroflexi</i>           |       | 0.07  | 0.04  | 0.03  | 0.01  | 0.01  | <0.01 | 0.02  |
| <i>Thermotogae</i>           |       | 0.05  | 0.03  | 0.04  | 0.01  | 0.01  | <0.01 | 0.01  |
| <i>Chlorobi</i>              |       | 0.02  | 0.02  | 0.02  | 0.01  | 0.01  | <0.01 | 0.02  |
| <i>Aquificae</i>             |       | 0.05  | 0.01  | 0.01  | <0.01 | 0.01  | <0.01 | <0.01 |
| <i>Chlamydiae</i>            |       | 0.03  | 0.01  | 0.01  | <0.01 | 0.01  | <0.01 | 0.01  |
| <i>Gemmatimonadetes</i>      |       | 0.02  | 0.01  | 0.01  | 0.01  | <0.01 | <0.01 | <0.01 |
| <i>Thermodesulfobacteria</i> |       | 0.02  | 0.01  | 0.01  | <0.01 | 0.01  | <0.01 | <0.01 |
| <i>Nitrospirae</i>           |       | 0.01  | 0.01  | 0.01  | 0.01  | 0.01  | <0.01 | <0.01 |
| <i>Deferribacteres</i>       |       | 0.01  | 0.01  | 0.01  | <0.01 | <0.01 | <0.01 | <0.01 |
| <i>Synergistetes</i>         |       | 0.01  | <0.01 | <0.01 | <0.01 | <0.01 | <0.01 | <0.01 |
| <i>Chrysiogenetes</i>        |       | <0.01 | <0.01 | <0.01 | <0.01 | <0.01 | <0.01 | <0.01 |

**Table S11.** The mean proportions and standard deviations (in parenthesis,  $n = 2$ ) of major (the 20 most abundant in each sample) bacterial phyla based on taxonomic classification using amplicon-based sequencing with the SILVA database in the seawater (SW), oil contaminated seawater (SWO) and biostimulated oil contaminated seawater (SWOB). The numbers in sample codes denote time in months.

| Phylum                | Class                      | SW0             | SW4              | SW8              | SWO4             | SWO8            | SWOB4           | SWOB8           |
|-----------------------|----------------------------|-----------------|------------------|------------------|------------------|-----------------|-----------------|-----------------|
| <i>Proteobacteria</i> |                            | 61.02<br>(0.88) | 53.27<br>(8.10)  | 43.64<br>(30.00) | 29.71<br>(12.31) | 32.43<br>(6.41) | 59.89<br>(7.65) | 62.16<br>(1.58) |
|                       | <i>Alphaproteobacteria</i> | 13.48<br>(0.37) | 24.10<br>(11.29) | 20.24<br>(21.09) | 15.33<br>(4.30)  | 7.56<br>(1.36)  | 13.38<br>(0.26) | 15.88<br>(6.28) |
|                       | <i>Gammaproteobacteria</i> | 45.97<br>(0.61) | 23.00<br>(12.00) | 20.13<br>(7.88)  | 13.82<br>(7.76)  | 24.25<br>(7.63) | 45.68<br>(7.76) | 45.02<br>(7.89) |
|                       | <i>Deltaproteobacteria</i> | 1.27<br>(0.07)  | 5.85<br>(7.21)   | 2.82<br>(0.80)   | 0.34<br>(0.14)   | 0.38<br>(0.11)  | 0.43<br>(0.03)  | 0.78<br>(0.02)  |
| <i>Bacteroidetes</i>  |                            | 13.30<br>(1.58) | 35.02<br>(12.55) | 38.63<br>(39.52) | 62.72<br>(16.69) | 53.84<br>(3.39) | 33.48<br>(7.31) | 27.13<br>(1.60) |
| <i>Cyanobacteria</i>  |                            | 14.68<br>(2.51) | 3.88<br>(1.14)   | 0.58<br>(0.23)   | 2.28<br>(1.41)   | 0.16<br>(0.11)  | 2.59<br>(0.25)  | 0.17<br>(0.03)  |
| <i>Chloroflexi</i>    |                            | 1.54<br>(0.12)  | 0.36<br>(0.22)   | 0.51<br>(0.08)   | 0.34<br>(0.23)   | 0.32<br>(0.05)  | 0.28<br>(0.03)  | 0.59<br>(0.01)  |
| <i>Marinimicrobia</i> |                            | 1.62            | 0.11             | 0.02             | 0.08             | 0.04            | 0.09            | 0.02            |

| Phylum                  | Class | SW0     | SW4     | SW8     | SWO4    | SWO8    | SWOB4   | SWOB8   |
|-------------------------|-------|---------|---------|---------|---------|---------|---------|---------|
|                         |       | (0.02)  | (0.05)  | (0.02)  | (0.05)  | (0.02)  | (<0.01) | (<0.01) |
| <i>Verrucomicrobia</i>  |       | 1.56    | 0.86    | 1.74    | 0.57    | 0.67    | 0.62    | 1.24    |
|                         |       | (0.02)  | (0.36)  | (1.06)  | (0.33)  | (0.15)  | (0.07)  | (0.01)  |
| <i>Planctomycetes</i>   |       | 1.47    | 2.95    | 9.60    | 1.69    | 9.14    | 0.57    | 1.91    |
|                         |       | (0.12)  | (0.73)  | (7.78)  | (0.67)  | (10.89) | (0.06)  | (<0.00) |
| <i>Acidobacteria</i>    |       | 1.10    | 1.32    | 2.88    | 1.07    | 1.85    | 1.21    | 2.92    |
|                         |       | (0.23)  | (0.80)  | (0.38)  | (0.69)  | (0.40)  | (0.03)  | (0.03)  |
| <i>Nitrospinae</i>      |       | 1.01    | 0.09    | 0.02    | 0.08    | 0.02    | 0.05    | 0.01    |
|                         |       | (0.01)  | (0.06)  | (0.02)  | (<0.01) | (<0.01) | (<0.01) | (<0.01) |
| <i>Actinobacteria</i>   |       | 0.61    | 0.67    | 0.83    | 0.47    | 0.52    | 0.46    | 1.15    |
|                         |       | (0.05)  | (0.22)  | (0.07)  | (0.22)  | (0.12)  | (0.11)  | (0.03)  |
| <i>Dadabacteria</i>     |       | 0.42    | 0.02    | <0.01   | 0.02    | 0.01    | 0.01    | <0.01   |
|                         |       | (0.06)  | (0.01)  | (<0.01) | (0.01)  | (<0.01) | (<0.01) | (<0.01) |
| <i>Gemmatimonadetes</i> |       | 0.42    | 0.28    | 0.32    | 0.20    | 0.21    | 0.18    | 0.46    |
|                         |       | (<0.01) | (0.18)  | (0.04)  | (0.14)  | (0.03)  | (0.02)  | (<0.01) |
| <i>Firmicutes</i>       |       | 0.66    | 0.70    | 0.41    | 0.43    | 0.24    | 0.23    | 1.34    |
|                         |       | (0.48)  | (0.47)  | (0.10)  | (0.46)  | (0.09)  | (0.04)  | (0.01)  |
| <i>PAUC34f</i>          |       | 0.15    | 0.02    | 0.00    | 0.01    | <0.01   | 0.01    | <0.01   |
|                         |       | (0.04)  | (<0.01) | (0.00)  | (<0.01) | (<0.01) | (<0.01) | (<0.01) |
| <i>Lentisphaerae</i>    |       | 0.07    | 0.02    | <0.01   | 0.02    | 0.01    | 0.01    | <0.01   |
|                         |       | (<0.01) | (0.01)  | (<0.01) | (<0.01) | (0.01)  | (0.01)  | (<0.01) |
| <i>Margulisbacteria</i> |       | 0.05    | 0.01    | 0.00    | <0.01   | <0.01   | 0.00    | <0.01   |
|                         |       | (<0.01) | (<0.01) | (0.00)  | (<0.01) | (<0.01) | (0.00)  | (<0.01) |
| <i>AncK6</i>            |       | 0.04    | 0.00    | 0.00    | <0.01   | 0.00    | <0.01   | 0.00    |
|                         |       | (<0.01) | (0.00)  | (0.00)  | (<0.01) | (0.00)  | (<0.01) | (0.00)  |
| <i>Latescibacteria</i>  |       | 0.03    | 0.07    | 0.14    | 0.05    | 0.08    | 0.05    | 0.18    |
|                         |       | (0.01)  | (0.04)  | (<0.01) | (0.01)  | (0.03)  | (0.01)  | (0.01)  |
| <i>Rokubacteria</i>     |       | 0.02    | 0.04    | 0.09    | 0.05    | 0.06    | 0.04    | 0.13    |
|                         |       | (0.01)  | (0.02)  | (0.02)  | (0.03)  | (<0.01) | (0.01)  | (0.01)  |
| <i>Spirochaetes</i>     |       | 0.04    | 0.02    | 0.06    | 0.02    | 0.04    | 0.01    | 0.09    |
|                         |       | (0.01)  | (0.01)  | (0.01)  | (0.02)  | (<0.01) | (0.01)  | (0.01)  |
| <i>Armatimonadetes</i>  |       | 0.02    | 0.03    | 0.06    | 0.01    | 0.03    | 0.04    | 0.07    |

| Phylum                    | Class | SW0     | SW4     | SW8     | SWO4    | SWO8    | SWOB4   | SWOB8   |
|---------------------------|-------|---------|---------|---------|---------|---------|---------|---------|
|                           |       | (0.01)  | (0.01)  | (0.01)  | (0.01)  | (0.01)  | (0.01)  | (<0.01) |
| <i>Patescibacteria</i>    |       | 0.01    | 0.02    | 0.01    | 0.02    | 0.01    | 0.01    | 0.02    |
|                           |       | (0.01)  | (<0.01) | (<0.01) | (0.02)  | (<0.01) | (0.01)  | (<0.01) |
| <i>Nitrospirae</i>        |       | 0.02    | 0.04    | 0.08    | 0.02    | 0.04    | 0.03    | 0.08    |
|                           |       | (0.01)  | (0.03)  | (0.01)  | (0.00)  | (0.01)  | (0.01)  | (0.02)  |
| <i>Elusimicrobia</i>      |       | 0.02    | 0.04    | 0.05    | 0.03    | 0.04    | 0.03    | 0.07    |
|                           |       | (0.01)  | (0.03)  | (0.01)  | (0.02)  | (0.02)  | (0.01)  | (<0.01) |
| <i>Epsilonbacteraeota</i> |       | 0.01    | 0.02    | 0.01    | 0.03    | 0.11    | 0.03    | 0.03    |
|                           |       | (<0.01) | (<0.01) | (0.01)  | (0.01)  | (0.03)  | (0.01)  | (<0.01) |
| <i>Omnitrophicaeota</i>   |       | 0.02    | 0.02    | 0.03    | 0.02    | 0.01    | 0.01    | 0.02    |
|                           |       | (0.01)  | (0.01)  | (<0.01) | (0.01)  | (0.01)  | (0.01)  | (<0.01) |
| <i>Synergistetes</i>      |       | 0.01    | 0.01    | 0.02    | 0.01    | 0.02    | 0.01    | 0.02    |
|                           |       | (<0.01) | (0.01)  | (<0.01) | (0.01)  | (0.01)  | (0.01)  | (<0.01) |
| <i>Fibrobacteres</i>      |       | 0.01    | <0.01   | 0.02    | 0.01    | 0.01    | 0.01    | 0.02    |
|                           |       | (<0.01) | (0.01)  | (<0.01) | (<0.01) | (0.01)  | (0.01)  | (<0.01) |
| <i>Thermotogae</i>        |       | 0.01    | 0.01    | 0.02    | 0.01    | 0.02    | 0.01    | 0.02    |
|                           |       | (0.01)  | (<0.01) | (0.01)  | (0.01)  | (<0.01) | (<0.01) | (<0.01) |
| <i>WPS-2</i>              |       | 0.01    | <0.01   | 0.12    | <0.01   | 0.01    | 0.01    | 0.01    |
|                           |       | (<0.01) | (<0.01) | (0.15)  | (<0.01) | (0.01)  | (<0.01) | (<0.01) |
| <i>Entotheonellaeota</i>  |       | 0.00    | 0.01    | 0.01    | 0.01    | 0.01    | 0.01    | 0.02    |
|                           |       | (0.00)  | (<0.01) | (<0.01) | (0.01)  | (<0.01) | (<0.01) | (<0.01) |

**Table S12.** The proportions (%) of the 50 predominant bacterial genera across all samples in seawater (SW), oil contaminated seawater (SWO), and biostimulated oil contaminated seawater (SWOB) according to taxonomic classification using Kaiju with the NCBI-nr database. The numbers in sample codes denote time in months.

| Genus                    | SW0  | SW4   | SW8  | SWO4  | SWO8  | SWOB4 | SWOB8 |
|--------------------------|------|-------|------|-------|-------|-------|-------|
| <i>Pseudomonas</i>       | 1.96 | 1.23  | 1.97 | 9.64  | 6.42  | 38.41 | 25.39 |
| <i>Cycloclasticus</i>    | 0.13 | 10.05 | 8.81 | 1.10  | 2.12  | 1.82  | 13.36 |
| <i>Marinomonas</i>       | 1.10 | 1.71  | 0.25 | 5.77  | 11.68 | 12.82 | 4.29  |
| <i>Colwellia</i>         | 3.96 | 4.94  | 3.86 | 4.57  | 10.87 | 1.73  | 0.60  |
| <i>Paraperlucidibaca</i> | 0.02 | 0.01  | 0.01 | <0.01 | <0.01 | 3.38  | 14.57 |

| <b>Genus</b>             | <b>SW0</b> | <b>SW4</b> | <b>SW8</b> | <b>SWO4</b> | <b>SWO8</b> | <b>SWOB4</b> | <b>SWOB8</b> |
|--------------------------|------------|------------|------------|-------------|-------------|--------------|--------------|
| <i>Hyphomonas</i>        | 0.03       | 0.10       | 0.17       | 16.33       | 4.96        | 0.02         | 0.08         |
| <i>Sphingorhabdus</i>    | 0.02       | 0.65       | 0.28       | 0.27        | 0.03        | 2.12         | 5.05         |
| <i>Polaribacter</i>      | 0.26       | 1.38       | 4.55       | 1.51        | 1.30        | 0.68         | 0.06         |
| <i>Pacificibacter</i>    | 0.03       | 0.87       | 0.83       | 4.51        | 2.32        | 0.06         | 0.19         |
| <i>Paraglaciecola</i>    | 0.18       | 0.47       | 1.05       | 0.65        | 2.35        | 1.66         | 0.94         |
| <i>Ulvibacter</i>        | 0.02       | 0.33       | 0.32       | 1.50        | 1.02        | 3.43         | 1.05         |
| <i>Methylophaga</i>      | 0.14       | 1.31       | 2.81       | 0.89        | 0.62        | 0.14         | 0.17         |
| <i>Maribacter</i>        | 0.03       | 1.16       | 0.71       | 3.21        | 1.13        | 0.06         | 0.05         |
| <i>Ca Thioglobus</i>     | 4.14       | 0.05       | 0.09       | 0.03        | 0.33        | 0.01         | 0.02         |
| <i>Marinobacter</i>      | 0.68       | 0.42       | 0.27       | 0.41        | 0.23        | 1.97         | 0.56         |
| <i>Clostridioides</i>    | 0.53       | 1.32       | 0.35       | 0.36        | 0.26        | 1.16         | 0.31         |
| <i>Oleispira</i>         | 0.17       | 0.09       | 0.18       | 0.02        | 0.10        | 4.35         | 0.03         |
| <i>Halomonas</i>         | 0.82       | 0.32       | 0.19       | 0.17        | 1.67        | 0.24         | 0.25         |
| <i>Perlucidibaca</i>     | 0.05       | 0.02       | 0.01       | 0.00        | 0.01        | 0.51         | 2.15         |
| <i>Neptunomonas</i>      | 0.87       | 0.16       | 0.11       | 0.60        | 0.17        | 2.04         | 0.09         |
| <i>Ca Pelagibacter</i>   | 1.70       | 0.10       | 1.22       | 0.01        | 0.16        | 0.01         | <0.01        |
| <i>Tenacibaculum</i>     | 0.04       | 0.60       | 2.26       | 0.28        | 0.14        | 0.08         | 0.02         |
| <i>Aequorivita</i>       | 0.01       | 0.13       | 0.19       | 0.19        | 0.47        | 1.03         | 0.92         |
| <i>Winogradskyella</i>   | 0.02       | 0.65       | 0.56       | 1.26        | 0.45        | 0.07         | 0.13         |
| <i>Nisaea</i>            | 0.02       | 0.01       | 2.74       | 0.01        | 0.01        | 0.01         | 0.04         |
| <i>Amphritea</i>         | 0.62       | 0.11       | 0.06       | 0.73        | 0.17        | 1.22         | 0.17         |
| <i>Lacinutrix</i>        | 0.01       | 0.15       | 0.29       | 1.26        | 1.12        | 0.04         | 0.06         |
| <i>Sphingopyxis</i>      | 0.03       | 0.13       | 0.07       | 0.19        | 0.04        | 0.48         | 1.11         |
| <i>Marinobacterium</i>   | 1.09       | 0.21       | 0.12       | 0.06        | 0.18        | 0.08         | 0.06         |
| <i>Parvibaculum</i>      | 0.01       | 0.01       | 0.01       | 1.35        | 0.84        | <0.01        | <0.01        |
| <i>Marinirhabdus</i>     | <0.01      | 0.03       | 0.10       | 0.09        | 1.84        | 0.01         | 0.01         |
| <i>Flavobacterium</i>    | 0.09       | 0.38       | 0.88       | 0.56        | 0.37        | 0.14         | 0.08         |
| <i>Pseudoalteromonas</i> | 0.47       | 0.51       | 0.30       | 0.19        | 0.42        | 0.20         | 0.13         |
| <i>Shewanella</i>        | 0.46       | 0.32       | 0.26       | 0.14        | 0.28        | 0.83         | 0.12         |
| <i>Hoeflea</i>           | 0.04       | 0.11       | 0.19       | 0.64        | 0.28        | 0.04         | 0.31         |
| <i>Doktonia</i>          | <0.01      | 0.36       | 0.90       | 0.06        | 0.09        | 0.02         | 0.01         |
| <i>Lutibacter</i>        | 0.02       | 0.24       | 0.82       | 0.18        | 0.08        | 0.08         | 0.03         |
| <i>Streptomyces</i>      | 0.31       | 0.31       | 0.19       | 0.09        | 0.39        | 0.06         | 0.05         |

| <b>Genus</b>          | <b>SW0</b> | <b>SW4</b> | <b>SW8</b> | <b>SW04</b> | <b>SW08</b> | <b>SWOB4</b> | <b>SWOB8</b> |
|-----------------------|------------|------------|------------|-------------|-------------|--------------|--------------|
| <i>Neptuniibacter</i> | 0.34       | 0.14       | 0.10       | 0.04        | 0.08        | 0.07         | 0.37         |
| <i>Photobacterium</i> | 0.24       | 0.10       | 0.08       | 0.04        | 0.64        | 0.05         | 0.09         |
| <i>Ralstonia</i>      | 0.20       | 0.34       | 0.06       | 0.19        | 0.04        | 0.47         | 0.03         |
| <i>Motiliproteus</i>  | 0.75       | 0.07       | 0.04       | 0.03        | 0.11        | 0.04         | 0.02         |
| <i>Maricaulis</i>     | 0.01       | 0.37       | 0.26       | 0.55        | 0.02        | <0.01        | 0.01         |
| <i>Acinetobacter</i>  | 0.27       | 0.17       | 0.10       | 0.05        | 0.09        | 0.09         | 0.25         |
| <i>Microbulbifer</i>  | 0.22       | 0.44       | 0.19       | 0.04        | 0.07        | 0.03         | 0.06         |
| <i>Thalassotalea</i>  | 0.35       | 0.12       | 0.15       | 0.09        | 0.26        | 0.04         | 0.02         |
| <i>Sphingomonas</i>   | 0.13       | 0.10       | 0.09       | 0.13        | 0.09        | 0.09         | 0.27         |

**Table S13.** The proportions (%) of the 50 predominant bacterial genera across all samples in seawater (SW), oil contaminated seawater (SWO), and biostimulated oil contaminated seawater (SWOB) according to taxonomic classification using Kaiju with the MAR<sub>DB</sub> database. The numbers in sample codes denote time in months.

| <b>Genus</b>            | <b>SW0</b> | <b>SW4</b> | <b>SW8</b> | <b>SW04</b> | <b>SW08</b> | <b>SWOB4</b> | <b>SWOB8</b> |
|-------------------------|------------|------------|------------|-------------|-------------|--------------|--------------|
| <i>Cycloclasticus</i>   | 0.25       | 23.20      | 16.69      | 1.75        | 3.99        | 2.66         | 25.33        |
| <i>Pseudomonas</i>      | 0.48       | 0.94       | 2.24       | 8.59        | 9.44        | 39.03        | 13.88        |
| <i>Marinomonas</i>      | 0.91       | 3.37       | 0.40       | 7.90        | 18.88       | 16.11        | 8.05         |
| <i>Colwellia</i>        | 17.78      | 8.46       | 5.18       | 4.90        | 13.63       | 1.86         | 1.08         |
| <i>Hyphomonas</i>       | 0.33       | 0.22       | 0.29       | 21.67       | 8.46        | 0.05         | 0.19         |
| <i>Flavobacterium</i>   | 0.36       | 5.92       | 18.51      | 0.50        | 0.28        | 0.13         | 0.13         |
| <i>Sphingorhabdus</i>   | 0.05       | 1.01       | 0.36       | 0.30        | 0.04        | 2.04         | 6.98         |
| <i>Paraglaciecola</i>   | 0.83       | 1.11       | 1.90       | 0.98        | 4.12        | 2.20         | 1.89         |
| <i>Pacificibacter</i>   | 0.05       | 1.64       | 1.26       | 6.55        | 4.01        | 0.08         | 0.38         |
| <i>Methylophaga</i>     | 0.34       | 3.41       | 6.01       | 1.62        | 1.33        | 0.28         | 0.53         |
| <i>Ulvibacter</i>       | 0.04       | 0.42       | 0.29       | 2.05        | 0.62        | 4.55         | 2.07         |
| <i>Ca. Pelagibacter</i> | 7.95       | 0.19       | 2.05       | 0.02        | 0.19        | 0.01         | 0.01         |
| <i>Marinobacter</i>     | 0.85       | 1.00       | 0.52       | 0.71        | 0.39        | 2.87         | 1.94         |
| <i>Maribacter</i>       | 0.14       | 2.18       | 1.00       | 4.31        | 1.85        | 0.10         | 0.11         |
| <i>Vibrio</i>           | 2.95       | 1.08       | 0.88       | 0.54        | 1.01        | 0.74         | 0.81         |
| <i>Polaribacter</i>     | 1.67       | 0.83       | 1.31       | 1.92        | 1.96        | 0.84         | 0.12         |
| <i>Sphingopyxis</i>     | 0.06       | 0.32       | 0.16       | 0.37        | 0.07        | 0.99         | 3.19         |



| <b>Genus</b>             | <b>SW0</b> | <b>SW4</b> | <b>SW8</b> | <b>SW04</b> | <b>SW08</b> | <b>SW0B4</b> | <b>SW0B8</b> |
|--------------------------|------------|------------|------------|-------------|-------------|--------------|--------------|
| <i>Oleispira</i>         | 0.29       | 0.24       | 0.32       | 0.04        | 0.17        | 5.57         | 0.13         |
| <i>Halomonas</i>         | 0.34       | 0.41       | 0.22       | 0.25        | 2.73        | 0.53         | 0.76         |
| <i>Neptunomonas</i>      | 0.40       | 0.41       | 0.23       | 0.98        | 0.26        | 2.99         | 0.36         |
| <i>Pseudoalteromonas</i> | 1.51       | 1.24       | 0.66       | 0.38        | 0.85        | 0.39         | 0.47         |
| <i>Sneathiella</i>       | 0.09       | 0.08       | 0.06       | 0.67        | 0.62        | 0.82         | 1.68         |
| <i>Nisaea</i>            | 0.19       | 0.03       | 5.14       | 0.03        | 0.04        | 0.02         | 0.10         |
| <i>Lacinutrix</i>        | 0.08       | 0.31       | 0.33       | 2.25        | 2.14        | 0.09         | 0.19         |
| <i>Alcanivorax</i>       | 0.21       | 0.60       | 0.26       | 0.16        | 0.12        | 0.42         | 1.60         |
| <i>Stappia</i>           | 0.09       | 0.08       | 0.12       | 0.78        | 0.09        | 0.81         | 1.49         |
| <i>Sulfitobacter</i>     | 0.54       | 1.11       | 1.02       | 0.55        | 0.60        | 0.08         | 0.13         |
| <i>Nitrospina</i>        | 4.43       | 0.04       | 0.06       | 0.05        | 0.04        | 0.01         | 0.02         |
| <i>Shewanella</i>        | 0.86       | 0.65       | 0.47       | 0.24        | 0.45        | 1.11         | 0.40         |
| <i>Aequorivita</i>       | 0.05       | 0.21       | 0.22       | 0.22        | 0.40        | 1.11         | 1.36         |
| <i>Zhongshania</i>       | 0.03       | 0.21       | 3.21       | 0.02        | 0.02        | 0.03         | 0.11         |
| <i>Hoeflea</i>           | 0.15       | 0.31       | 0.36       | 0.97        | 0.50        | 0.06         | 0.64         |
| <i>Winogradskyella</i>   | 0.06       | 0.80       | 0.34       | 1.03        | 0.43        | 0.06         | 0.16         |
| <i>Amphritea</i>         | 0.20       | 0.18       | 0.08       | 0.77        | 0.13        | 1.15         | 0.26         |
| <i>Donghicola</i>        | 1.20       | 0.47       | 0.26       | 0.20        | 0.55        | 0.10         | 0.04         |
| <i>Parvibaculum</i>      | 0.16       | 0.03       | 0.07       | 1.39        | 1.03        | 0.00         | 0.02         |
| <i>Microbulbifer</i>     | 0.28       | 1.00       | 0.34       | 0.09        | 0.11        | 0.11         | 0.33         |
| <i>Marinobacterium</i>   | 0.38       | 0.45       | 0.22       | 0.18        | 0.15        | 0.30         | 0.40         |
| <i>Porticoccus</i>       | 1.11       | 0.76       | 0.45       | 0.02        | 0.03        | 0.02         | 0.05         |
| <i>Loktanella</i>        | 1.35       | 0.22       | 0.14       | 0.09        | 0.11        | 0.06         | 0.25         |
| <i>Neptuniibacter</i>    | 0.18       | 0.33       | 0.19       | 0.08        | 0.08        | 0.14         | 0.74         |
| <i>Maricaulis</i>        | 0.18       | 0.80       | 0.48       | 0.85        | 0.07        | 0.01         | 0.03         |
| <i>Halobacteriovorax</i> | 0.08       | 0.10       | 2.22       | 0.01        | 0.01        | 0.00         | 0.01         |
| <i>Ca. Thioglobus</i>    | 2.27       | 0.03       | 0.03       | 0.01        | 0.05        | 0.00         | 0.01         |
| <i>Thalassotalea</i>     | 1.05       | 0.25       | 0.24       | 0.15        | 0.45        | 0.06         | 0.07         |
| <i>Psychromonas</i>      | 0.65       | 0.40       | 0.28       | 0.16        | 0.35        | 0.15         | 0.15         |
| <i>Acinetobacter</i>     | 0.12       | 0.06       | 0.04       | 0.02        | 0.03        | 0.20         | 0.88         |
| <i>Endozoicomonas</i>    | 0.60       | 0.46       | 0.21       | 0.07        | 0.13        | 0.14         | 0.29         |
| <i>Alteromonas</i>       | 0.53       | 0.37       | 0.23       | 0.10        | 0.20        | 0.11         | 0.30         |
| <i>Streptomyces</i>      | 0.43       | 1.00       | 0.16       | 0.08        | 0.07        | 0.10         | 0.15         |

**Table S14.** The proportions (%) of the 50 predominant bacterial genera across all samples in seawater (SW), oil contaminated seawater (SWO), and biostimulated oil contaminated seawater (SWOB) according to taxonomic classification using Kraken2 with the Standard Kraken2 database. The numbers in sample codes denote time in months.

| <b>Genus</b>             | <b>SW0</b> | <b>SW4</b> | <b>SW8</b> | <b>SW04</b> | <b>SW08</b> | <b>SW0B4</b> | <b>SW0B8</b> |
|--------------------------|------------|------------|------------|-------------|-------------|--------------|--------------|
| <i>Pseudomonas</i>       | 3.02       | 5.68       | 5.37       | 13.63       | 13.06       | 50.54        | 34.31        |
| <i>Marinomonas</i>       | 2.24       | 5.49       | 0.62       | 13.10       | 25.14       | 19.14        | 10.36        |
| <i>Colwellia</i>         | 8.32       | 9.97       | 6.26       | 4.95        | 10.82       | 1.39         | 0.61         |
| <i>Sphingorhabdus</i>    | 0.04       | 2.68       | 0.96       | 0.76        | 0.09        | 3.53         | 12.40        |
| <i>Polaribacter</i>      | 1.36       | 5.13       | 15.15      | 5.14        | 3.35        | 1.32         | 0.34         |
| <i>Staphylococcus</i>    | 4.46       | 5.20       | 4.46       | 2.26        | 1.42        | 2.03         | 0.89         |
| <i>Cycloclasticus</i>    | 0.18       | 1.90       | 1.47       | 0.14        | 0.23        | 0.21         | 4.96         |
| <i>Ca. Pelagibacter</i>  | 7.83       | 0.23       | 4.15       | 0.02        | 0.20        | 0.01         | 0.01         |
| <i>Shewanella</i>        | 3.14       | 1.80       | 1.45       | 0.59        | 1.06        | 1.56         | 0.93         |
| <i>Klebsiella</i>        | 0.66       | 3.01       | 0.32       | 0.31        | 0.16        | 3.90         | 1.98         |
| <i>Pseudoalteromonas</i> | 3.36       | 1.94       | 1.42       | 0.70        | 1.47        | 0.47         | 0.67         |
| <i>Halomonas</i>         | 1.19       | 1.14       | 0.62       | 0.93        | 3.80        | 0.71         | 1.40         |
| <i>Acinetobacter</i>     | 2.96       | 1.10       | 1.06       | 0.31        | 0.51        | 0.35         | 1.88         |
| <i>Lacinutrix</i>        | 0.06       | 0.56       | 1.22       | 3.67        | 3.09        | 0.14         | 0.21         |
| <i>Vibrio</i>            | 3.15       | 1.48       | 1.24       | 0.57        | 0.92        | 0.41         | 0.97         |
| <i>Winogradskyella</i>   | 0.09       | 1.52       | 1.59       | 2.53        | 1.03        | 0.15         | 0.26         |
| <i>Flavobacterium</i>    | 0.38       | 1.09       | 2.07       | 1.99        | 0.88        | 0.37         | 0.33         |
| <i>Sulfitobacter</i>     | 0.71       | 1.28       | 1.25       | 1.57        | 1.34        | 0.12         | 0.26         |
| <i>Paraglaciecola</i>    | 0.61       | 0.64       | 1.17       | 0.53        | 1.63        | 0.60         | 0.60         |
| <i>Ca. Thioglobus</i>    | 6.31       | 0.08       | 0.11       | 0.03        | 0.23        | 0.01         | 0.03         |
| <i>Marinobacter</i>      | 0.55       | 0.87       | 0.44       | 0.40        | 0.16        | 1.58         | 0.88         |
| <i>Hyphomonas</i>        | 0.02       | 0.06       | 0.09       | 4.26        | 1.11        | 0.01         | 0.05         |
| <i>Tenacibaculum</i>     | 0.15       | 0.96       | 3.04       | 0.79        | 0.32        | 0.12         | 0.09         |
| <i>Neptunomonas</i>      | 1.25       | 0.24       | 0.16       | 0.95        | 0.12        | 2.14         | 0.17         |
| <i>Maribacter</i>        | 0.07       | 0.56       | 0.68       | 2.33        | 0.74        | 0.06         | 0.05         |
| <i>Ralstonia</i>         | 0.06       | 0.06       | 0.05       | 0.07        | 3.89        | 0.03         | 0.09         |
| <i>Formosa</i>           | 0.09       | 0.53       | 1.11       | 1.71        | 0.59        | 0.11         | 0.18         |
| <i>Alteromonas</i>       | 1.09       | 0.50       | 0.44       | 0.18        | 0.36        | 0.14         | 0.34         |
| <i>Zhongshania</i>       | 0.12       | 0.90       | 2.01       | 0.01        | 0.02        | 0.01         | 0.09         |

| <b>Genus</b>          | <b>SW0</b> | <b>SW4</b> | <b>SW8</b> | <b>SW04</b> | <b>SW08</b> | <b>SW0B4</b> | <b>SW0B8</b> |
|-----------------------|------------|------------|------------|-------------|-------------|--------------|--------------|
| <i>Cellulophaga</i>   | 0.07       | 0.47       | 0.80       | 1.09        | 0.31        | 0.11         | 0.09         |
| <i>Aequorivita</i>    | 0.02       | 0.11       | 0.19       | 0.22        | 0.35        | 0.47         | 0.70         |
| <i>Algibacter</i>     | 0.04       | 0.27       | 0.48       | 1.22        | 0.40        | 0.11         | 0.13         |
| <i>Sphingomonas</i>   | 0.13       | 0.22       | 0.21       | 0.58        | 0.22        | 0.14         | 0.61         |
| <i>Salmonella</i>     | 0.63       | 0.74       | 0.21       | 0.33        | 0.15        | 0.23         | 0.22         |
| <i>Rhizobium</i>      | 0.26       | 0.24       | 0.34       | 0.76        | 0.38        | 0.07         | 0.30         |
| <i>Bradyrhizobium</i> | 0.26       | 0.25       | 0.33       | 0.70        | 0.31        | 0.05         | 0.25         |
| <i>Microbulbifer</i>  | 0.38       | 1.01       | 0.38       | 0.10        | 0.08        | 0.06         | 0.21         |
| <i>Legionella</i>     | 0.78       | 0.45       | 0.37       | 0.08        | 0.14        | 0.04         | 0.22         |
| <i>Celeribacter</i>   | 0.15       | 0.48       | 0.43       | 0.62        | 0.29        | 0.02         | 0.08         |
| <i>Mesorhizobium</i>  | 0.21       | 0.19       | 0.29       | 0.62        | 0.30        | 0.04         | 0.23         |
| <i>Haemophilus</i>    | 0.77       | 0.43       | 0.21       | 0.20        | 0.18        | 0.12         | 0.12         |
| <i>Streptomyces</i>   | 0.56       | 0.37       | 0.38       | 0.31        | 0.11        | 0.09         | 0.14         |
| <i>Octadecabacter</i> | 0.74       | 0.41       | 0.32       | 0.33        | 0.17        | 0.01         | 0.07         |
| <i>Thalassotalea</i>  | 0.60       | 0.28       | 0.29       | 0.19        | 0.43        | 0.05         | 0.11         |
| <i>Psychrobacter</i>  | 0.67       | 0.28       | 0.19       | 0.05        | 0.09        | 0.07         | 0.34         |
| <i>Olleya</i>         | 0.02       | 0.15       | 0.28       | 0.92        | 0.29        | 0.04         | 0.08         |
| <i>Xanthomonas</i>    | 0.31       | 0.43       | 0.19       | 0.23        | 0.09        | 0.20         | 0.22         |
| <i>Cellvibrio</i>     | 0.29       | 0.72       | 0.29       | 0.05        | 0.07        | 0.05         | 0.21         |
| <i>Aquimarina</i>     | 0.06       | 0.33       | 0.70       | 0.37        | 0.18        | 0.08         | 0.06         |
| <i>Burkholderia</i>   | 0.32       | 0.37       | 0.20       | 0.28        | 0.10        | 0.14         | 0.22         |

**Table S15.** The proportions (%) of the 50 predominant bacterial genera across all samples in seawater (SW), oil contaminated seawater (SWO), and biostimulated oil contaminated seawater (SWOB) according to taxonomic classification using Bracken with the Standard Kraken 2 database. The numbers in sample codes denote time in months.

| <b>Genus</b>          | <b>SW0</b> | <b>SW4</b> | <b>SW8</b> | <b>SW04</b> | <b>SW08</b> | <b>SW0B4</b> | <b>SW0B8</b> |
|-----------------------|------------|------------|------------|-------------|-------------|--------------|--------------|
| <i>Pseudomonas</i>    | 2.71       | 4.74       | 4.83       | 12.21       | 11.97       | 48.14        | 31.65        |
| <i>Marinomonas</i>    | 1.94       | 4.51       | 0.54       | 11.32       | 22.82       | 18.07        | 9.26         |
| <i>Colwellia</i>      | 6.73       | 8.16       | 5.34       | 4.33        | 10.05       | 1.33         | 0.54         |
| <i>Klebsiella</i>     | 0.80       | 11.87      | 0.51       | 0.38        | 0.24        | 5.58         | 6.71         |
| <i>Sphingorhabdus</i> | 0.03       | 2.19       | 0.81       | 0.65        | 0.08        | 3.35         | 11.23        |

| <b>Genus</b>             | <b>SW0</b> | <b>SW4</b> | <b>SW8</b> | <b>SW04</b> | <b>SW08</b> | <b>SW0B4</b> | <b>SW0B8</b> |
|--------------------------|------------|------------|------------|-------------|-------------|--------------|--------------|
| <i>Polaribacter</i>      | 1.15       | 4.48       | 13.76      | 4.71        | 3.25        | 1.34         | 0.33         |
| <i>Salmonella</i>        | 8.57       | 2.66       | 3.95       | 3.44        | 2.46        | 1.36         | 1.30         |
| <i>Staphylococcus</i>    | 5.00       | 4.96       | 5.22       | 2.76        | 1.91        | 2.30         | 1.01         |
| <i>Pseudoalteromonas</i> | 4.81       | 2.29       | 2.05       | 1.27        | 1.97        | 0.67         | 0.85         |
| <i>Cyclocasticus</i>     | 0.14       | 1.55       | 1.25       | 0.12        | 0.21        | 0.20         | 4.34         |
| <i>Halomonas</i>         | 1.02       | 0.94       | 0.55       | 0.81        | 3.57        | 0.68         | 1.25         |
| <i>Ca. Pelagibacter</i>  | 6.16       | 0.19       | 3.44       | 0.02        | 0.18        | 0.01         | 0.00         |
| <i>Shewanella</i>        | 2.54       | 1.49       | 1.30       | 0.52        | 1.01        | 1.48         | 0.83         |
| <i>Acinetobacter</i>     | 2.55       | 0.93       | 1.00       | 0.28        | 0.50        | 0.35         | 1.69         |
| <i>Lacinutrix</i>        | 0.06       | 0.54       | 1.23       | 3.50        | 3.04        | 0.16         | 0.22         |
| <i>Vibrio</i>            | 2.82       | 1.22       | 1.12       | 0.50        | 0.88        | 0.40         | 0.87         |
| <i>Winogradskyella</i>   | 0.08       | 1.46       | 1.63       | 2.47        | 1.05        | 0.17         | 0.28         |
| <i>Flavobacterium</i>    | 0.34       | 0.99       | 1.97       | 1.86        | 0.86        | 0.39         | 0.33         |
| <i>Sulfitobacter</i>     | 0.66       | 1.20       | 1.18       | 1.47        | 1.30        | 0.12         | 0.26         |
| <i>Paraglaciecola</i>    | 0.49       | 0.53       | 1.00       | 0.46        | 1.52        | 0.58         | 0.55         |
| <i>Ca. Thioglobus</i>    | 4.98       | 0.07       | 0.15       | 0.03        | 0.21        | 0.01         | 0.03         |
| <i>Hyphomonas</i>        | 0.02       | 0.05       | 0.08       | 4.08        | 1.11        | 0.01         | 0.05         |
| <i>Tenacibaculum</i>     | 0.14       | 0.88       | 2.91       | 0.75        | 0.31        | 0.13         | 0.09         |
| <i>Marinobacter</i>      | 0.44       | 0.71       | 0.38       | 0.35        | 0.14        | 1.49         | 0.78         |
| <i>Neptunomonas</i>      | 1.07       | 0.20       | 0.14       | 0.82        | 0.11        | 2.02         | 0.14         |
| <i>Formosa</i>           | 0.08       | 0.49       | 1.09       | 1.61        | 0.58        | 0.12         | 0.18         |
| <i>Maribacter</i>        | 0.06       | 0.51       | 0.64       | 2.14        | 0.72        | 0.06         | 0.06         |
| <i>Burkholderia</i>      | 0.77       | 0.70       | 0.61       | 0.62        | 0.25        | 0.27         | 0.42         |
| <i>Ralstonia</i>         | 0.05       | 0.05       | 0.05       | 0.06        | 3.62        | 0.02         | 0.09         |
| <i>Aeromonas</i>         | 0.87       | 0.39       | 0.55       | 0.29        | 0.27        | 0.16         | 0.36         |
| <i>Alteromonas</i>       | 0.92       | 0.43       | 0.42       | 0.17        | 0.36        | 0.14         | 0.32         |
| <i>Paenibacillus</i>     | 1.47       | 0.12       | 0.36       | 0.24        | 0.44        | 0.10         | 0.13         |
| <i>Rhizobium</i>         | 0.26       | 0.25       | 0.38       | 0.89        | 0.45        | 0.07         | 0.33         |
| <i>Algibacter</i>        | 0.04       | 0.27       | 0.51       | 1.24        | 0.43        | 0.13         | 0.14         |
| <i>Olleya</i>            | 0.03       | 0.24       | 0.47       | 1.35        | 0.44        | 0.07         | 0.14         |
| <i>Cellulophaga</i>      | 0.06       | 0.42       | 0.76       | 1.01        | 0.30        | 0.11         | 0.09         |
| <i>Sphingomonas</i>      | 0.12       | 0.21       | 0.21       | 0.58        | 0.23        | 0.16         | 0.65         |
| <i>Xanthomonas</i>       | 0.55       | 0.48       | 0.39       | 0.36        | 0.19        | 0.25         | 0.29         |

| Genus                 | SW0  | SW4  | SW8  | SW04 | SW08 | SW0B4 | SW0B8 |
|-----------------------|------|------|------|------|------|-------|-------|
| <i>Zhongshania</i>    | 0.10 | 0.76 | 1.74 | 0.01 | 0.02 | 0.01  | 0.08  |
| <i>Sphingobium</i>    | 0.13 | 0.16 | 0.20 | 0.46 | 0.20 | 0.15  | 0.70  |
| <i>Aequorivita</i>    | 0.02 | 0.10 | 0.16 | 0.19 | 0.32 | 0.46  | 0.64  |
| <i>Celeribacter</i>   | 0.17 | 0.52 | 0.48 | 0.70 | 0.33 | 0.02  | 0.09  |
| <i>Bradyrhizobium</i> | 0.23 | 0.22 | 0.30 | 0.68 | 0.32 | 0.05  | 0.25  |
| <i>Streptomyces</i>   | 0.59 | 0.40 | 0.38 | 0.32 | 0.12 | 0.10  | 0.14  |
| <i>Mesorhizobium</i>  | 0.19 | 0.17 | 0.28 | 0.62 | 0.32 | 0.04  | 0.23  |
| <i>Microbulbifer</i>  | 0.31 | 0.85 | 0.32 | 0.09 | 0.08 | 0.06  | 0.18  |
| <i>Parvibaculum</i>   | 0.01 | 0.01 | 0.02 | 1.19 | 0.72 | 0.00  | 0.02  |
| <i>Legionella</i>     | 0.63 | 0.38 | 0.32 | 0.07 | 0.13 | 0.04  | 0.20  |
| <i>Phaeobacter</i>    | 0.22 | 0.71 | 0.49 | 0.22 | 0.12 | 0.01  | 0.08  |
| <i>Haemophilus</i>    | 0.64 | 0.36 | 0.19 | 0.18 | 0.18 | 0.12  | 0.11  |

**Table S16.** The mean proportions (%) and standard deviations (in parenthesis,  $n = 2$ ) of the 50 predominant bacterial genera across all samples in seawater (SW), oil contaminated seawater (SWO), and biostimulated oil contaminated seawater (SWOB) according to taxonomic classification based on amplicon-sequencing and the SILVA database. The numbers in sample codes denote time in months.

| Genus                    | SW0         | SW4         | SW8          | SWO4        | SWO8          | SWOB4         | SWOB8         |
|--------------------------|-------------|-------------|--------------|-------------|---------------|---------------|---------------|
| <i>Colwellia</i>         | 6.45 (0.20) | 4.63 (5.15) | 3.53 (0.72)  | 2.75 (0.19) | 9.91 (4.16)   | 1.07 (0.57)   | 1.80 (0.03)   |
| <i>Marinomonas</i>       | 0.51 (0.01) | 2.19 (2.23) | 0.36 (0.11)  | 2.87 (0.37) | 5.28 (0.97)   | 14.70 (6.71)  | 4.59 (2.25)   |
| <i>SM1A02</i>            | 0.20 (0.18) | 1.43 (0.84) | 6.83 (7.40)  | 0.70 (0.71) | 8.36 (10.87)  | 0.05 (0.01)   | 0.56 (0.02)   |
| <i>Paraperlucidibaca</i> | 0.07 (0.00) | 0.15 (0.00) | 0.39 (0.03)  | 0.08 (0.06) | 0.24 (0.05)   | 2.97 (3.94)   | 16.56 (13.59) |
| <i>Jejudonia</i>         | 0.04 (0.01) | 0.06 (0.02) | 0.49 (0.21)  | 0.21 (0.22) | 13.85 (19.01) | 0.02 (0.00)   | 0.41 (0.02)   |
| <i>Ulvibacter</i>        | 0.63 (0.05) | 3.72 (1.19) | 0.52 (0.43)  | 3.21 (2.66) | 0.26 (0.19)   | 14.16 (18.75) | 2.54 (3.13)   |
| <i>Pacificibacter</i>    | 0.25 (0.09) | 1.90 (1.58) | 8.05 (10.77) | 4.48 (1.16) | 2.23 (2.84)   | 0.58 (0.43)   | 0.91 (0.38)   |
| <i>Aequorivita</i>       | 0.09 (0.04) | 0.07 (0.04) | 0.24 (0.02)  | 0.16 (0.17) | 0.17 (0.04)   | 3.20 (0.08)   | 11.55 (8.54)  |
| <i>Sphingorhabdus</i>    | 0.17 (0.07) | 0.67 (0.35) | 0.83 (0.68)  | 0.32 (0.18) | 0.18 (0.00)   | 5.95 (2.70)   | 5.93 (7.40)   |
| <i>Pseudomonas</i>       | 0.26 (0.05) | 0.20 (0.08) | 0.25 (0.09)  | 0.78 (0.93) | 0.24 (0.10)   | 10.76 (10.51) | 3.70 (3.53)   |
| <i>Cycloclasticus</i>    | 0.05 (0.01) | 2.13 (0.21) | 1.90 (0.91)  | 0.25 (0.15) | 0.46 (0.36)   | 0.59 (0.74)   | 7.74 (4.46)   |
| <i>Sneathiella</i>       | 0.13 (0.01) | 0.33 (0.15) | 0.35 (0.23)  | 0.69 (0.30) | 0.52 (0.44)   | 3.35 (3.00)   | 3.95 (4.53)   |
| <i>Aurantivirga</i>      | 0.24 (0.01) | 2.55 (2.14) | 6.88 (9.09)  | 0.28 (0.22) | 0.13 (0.02)   | 0.18 (0.05)   | 0.21 (0.00)   |
| <i>Lacinutrix</i>        | 0.27 (0.30) | 0.10 (0.05) | 0.15 (0.09)  | 1.08 (1.37) | 3.13 (4.31)   | 0.03 (0.00)   | 0.07 (0.01)   |

| Genus                     | SW0          | SW4          | SW8          | SWO4         | SWO8         | SWOB4        | SWOB8        |
|---------------------------|--------------|--------------|--------------|--------------|--------------|--------------|--------------|
| <i>Hyphomonas</i>         | 0.11 (0.01)  | 0.16 (0.01)  | 0.06 (0.00)  | 3.20 (2.25)  | 1.56 (1.83)  | 0.10 (0.03)  | 0.11 (0.03)  |
| <i>Sulfitobacter</i>      | 0.59 (0.02)  | 5.36 (4.76)  | 0.90 (1.14)  | 0.48 (0.47)  | 0.03 (0.01)  | 0.25 (0.01)  | 0.08 (0.00)  |
| <i>OM43_clade genus</i>   | 0.64 (0.09)  | 0.74 (0.90)  | 3.84 (5.19)  | 0.03 (0.02)  | 0.07 (0.02)  | 0.04 (0.02)  | 0.12 (0.01)  |
| <i>Maribacter</i>         | 0.07 (0.01)  | 0.61 (0.66)  | 0.22 (0.26)  | 1.71 (0.15)  | 0.98 (1.03)  | 0.08 (0.01)  | 0.11 (0.01)  |
| <i>Polaribacter</i>       | 2.29 (0.15)  | 0.19 (0.03)  | 0.13 (0.07)  | 0.23 (0.03)  | 0.95 (1.19)  | 0.13 (0.03)  | 0.07 (0.04)  |
| <i>C1-B045</i>            | 0.05 (0.01)  | 4.31 (1.83)  | 0.76 (0.38)  | 0.07 (0.05)  | 0.04 (0.03)  | 0.04 (0.01)  | 0.02 (0.00)  |
| <i>Dokdonia</i>           | 0.12 (0.02)  | 2.51 (2.20)  | 1.78 (0.32)  | 0.11 (0.07)  | 0.03 (0.00)  | 0.08 (0.00)  | 0.05 (0.00)  |
| <i>Clade_Ia genus</i>     | 4.10 (0.02)  | 0.14 (0.06)  | 0.06 (0.03)  | 0.11 (0.05)  | 0.06 (0.03)  | 0.10 (0.03)  | 0.02 (0.02)  |
| <i>Tenacibaculum</i>      | 0.18 (0.00)  | 2.56 (2.93)  | 0.36 (0.47)  | 0.32 (0.31)  | 0.01 (0.01)  | 0.15 (0.01)  | 0.08 (0.04)  |
| <i>Paraglaciecola</i>     | 0.06 (0.02)  | 0.18 (0.06)  | 0.21 (0.02)  | 0.18 (0.12)  | 0.64 (0.55)  | 0.89 (1.09)  | 0.36 (0.08)  |
| <i>SUP05_cluster</i>      | 3.08 (0.10)  | 0.10 (0.06)  | 0.02 (0.01)  | 0.09 (0.02)  | 0.08 (0.02)  | 0.08 (0.02)  | 0.02 (0.02)  |
| <i>Loktanella</i>         | 0.41 (0.02)  | 1.72 (2.00)  | 0.03 (0.01)  | 0.23 (0.23)  | 0.03 (0.01)  | 0.20 (0.03)  | 0.42 (0.42)  |
| <i>Parvibaculum</i>       | 0.05 (0.01)  | 0.04 (0.03)  | 0.03 (0.01)  | 2.13 (2.88)  | 0.59 (0.81)  | 0.04 (0.01)  | 0.03 (0.00)  |
| <i>Oleispira</i>          | 0.08 (0.02)  | 0.11 (0.07)  | 0.10 (0.08)  | 0.16 (0.18)  | 0.04 (0.02)  | 2.21 (2.90)  | 0.05 (0.01)  |
| <i>Pseudophaeobacter</i>  | 0.01 (0.00)  | 1.72 (1.99)  | 0.82 (1.11)  | 0.03 (0.02)  | 0.01 (0.01)  | 0.02 (0.01)  | 0.02 (0.00)  |
| <i>Arcticiflavibacter</i> | 0.13 (0.03)  | 0.11 (0.00)  | 0.08 (0.03)  | 0.81 (0.34)  | 0.51 (0.40)  | 0.09 (0.05)  | 0.30 (0.29)  |
| <i>Winogradskyella</i>    | 0.07 (0.01)  | 1.44 (1.57)  | 0.25 (0.32)  | 0.34 (0.29)  | 0.05 (0.05)  | 0.03 (0.02)  | 0.01 (0.00)  |
| <i>Cocleimonas</i>        | 0.07 (0.02)  | 1.11 (1.38)  | 0.01 (0.01)  | 0.12 (0.10)  | 0.01 (0.00)  | 0.07 (0.00)  | 0.58 (0.52)  |
| <i>Zhongshania</i>        | <0.01 (0.00) | 0.05 (0.06)  | 1.79 (1.92)  | 0.01 (0.01)  | 0.02 (0.00)  | <0.01 (0.00) | 0.04 (0.02)  |
| <i>Porticoccus</i>        | 0.38 (0.01)  | 0.79 (0.23)  | 0.63 (0.83)  | 0.02 (0.00)  | 0.02 (0.00)  | 0.05 (0.03)  | 0.07 (0.01)  |
| <i>Flavobacterium</i>     | 0.12 (0.01)  | 0.22 (0.08)  | 0.22 (0.06)  | 0.10 (0.04)  | 0.16 (0.03)  | 0.45 (0.29)  | 0.28 (0.00)  |
| <i>Hoeflea</i>            | 0.01 (0.01)  | 0.12 (0.05)  | 0.07 (0.07)  | 0.21(0.10)   | 0.10 (0.00)  | 0.04 (0.01)  | 0.84 (0.51)  |
| <i>Amphritea</i>          | 0.02 (0.01)  | 0.03 (0.03)  | <0.01 (0.00) | 0.24 (0.01)  | 0.01 (0.01)  | 0.94 (0.75)  | 0.11 (0.07)  |
| <i>Pseudohongiella</i>    | 0.27 (0.01)  | 0.22 (0.25)  | 0.07 (0.01)  | 0.48 (0.63)  | 0.24 (0.03)  | 0.08 (0.08)  | 0.02 (0.02)  |
| <i>Neptunomonas</i>       | 0.03 (0.00)  | 0.05 (0.02)  | <0.01 (0.00) | 0.24 (0.19)  | <0.01 (0.00) | 0.88 (1.01)  | 0.02 (0.01)  |
| <i>Cellulophaga</i>       | 0.04 (0.01)  | 0.04 (0.02)  | 0.01 (0.01)  | 1.01 (0.84)  | 0.05 (0.04)  | 0.04 (0.00)  | <0.01 (0.00) |
| <i>Algimonas</i>          | 0.01 (0.01)  | 0.10 (0.10)  | 0.81 (0.54)  | 0.13 (0.02)  | 0.02 (0.01)  | 0.01 (0.00)  | 0.02 (0.01)  |
| <i>Sedimentitalea</i>     | 0.01 (0.01)  | 0.62 (0.30)  | 0.39 (0.52)  | 0.05 (0.02)  | 0.01 (0.00)  | 0.01 (0.00)  | 0.01 (0.00)  |
| <i>Nisaea</i>             | <0.01 (0.00) | <0.01 (0.00) | 0.87 (1.18)  | <0.01 (0.00) | 0.02 (0.00)  | <0.01 (0.00) | 0.01 (0.01)  |
| <i>Lentilitoribacter</i>  | 0.02 (0.01)  | 0.67 (0.13)  | 0.12 (0.17)  | 0.05 (0.04)  | <0.01 (0.00) | 0.02 (0.00)  | 0.01 (0.01)  |
| <i>Bryobacter</i>         | 0.12 (0.06)  | 0.08 (0.06)  | 0.15 (0.02)  | 0.07 (0.04)  | 0.13 (0.02)  | 0.06 (0.00)  | 0.19 (0.00)  |
| <i>LS-NOB</i>             | 0.69 (0.02)  | 0.05 (0.02)  | 0.01 (0.01)  | 0.04 (0.00)  | 0.01 (0.00)  | 0.03 (0.00)  | 0.01 (0.00)  |
| <i>Sphingomonas</i>       | 0.06 (0.00)  | 0.09 (0.06)  | 0.13 (0.02)  | 0.06 (0.03)  | 0.09 (0.03)  | 0.08 (0.00)  | 0.15 (0.02)  |

| Genus                 | SW0         | SW4         | SW8         | SWO4        | SWO8        | SWOB4       | SWOB8       |
|-----------------------|-------------|-------------|-------------|-------------|-------------|-------------|-------------|
| <i>Ca. Solibacter</i> | 0.06 (0.00) | 0.07 (0.04) | 0.16 (0.03) | 0.04 (0.02) | 0.09 (0.03) | 0.06 (0.02) | 0.15 (0.00) |
| <i>Roseobacter</i>    | 0.02 (0.00) | 0.05 (0.00) | 0.04 (0.02) | 0.19 (0.09) | 0.27 (0.22) | 0.09 (0.11) | 0.02 (0.02) |
| <i>RB41</i>           | 0.04 (0.00) | 0.07 (0.05) | 0.16 (0.02) | 0.06 (0.05) | 0.08 (0.01) | 0.05 (0.00) | 0.15 (0.03) |

**Table S17.** The correlation (multivariate generalization of the Pearson correlation coefficient (RV)) between datasets of proportions of the 50 predominant bacterial genera (white background in table) and proportions of bacterial genera containing hydrocarbon degraders (yellow background in table) acquired with five different taxonomic classification methods (Kaiju with the NCBI-nr database, Kaiju with the MAR<sub>DB</sub> database, Kraken2 with the Standard Kraken 2 database, Bracken with the Standard Kraken 2 database, and amplicon based sequencing with the SILVA database).

| Classification method | Kaiju | Kaiju/MAR | Kraken2 | Bracken | Amplicon |
|-----------------------|-------|-----------|---------|---------|----------|
| <b>Kaiju</b>          |       | 0.95      | 0.92    | 0.92    | 0.85     |
| <b>Kaiju/MAR</b>      | 0.92  |           | 0.91    | 0.90    | 0.85     |
| <b>Kraken2</b>        | 0.89  | 0.90      |         | 0.99    | 0.83     |
| <b>Bracken</b>        | 0.88  | 0.89      | 0.99    |         | 0.81     |
| <b>Amplicon</b>       | 0.58  | 0.61      | 0.74    | 0.76    |          |

**Table S18.** The proportions (%) of the most abundant bacterial species (>1% of bacterial community in at least one treatment) in seawater (SW), oil contaminated seawater (SWO), and biostimulated oil contaminated seawater (SWOB) according to classification using Kaiju with the NCBI-nr database. The numbers in sample codes denote time in months.

| Species                                                      | SW0   | SW4  | SW8  | SWO4 | SWO8 | SWOB4 | SWOB8 |
|--------------------------------------------------------------|-------|------|------|------|------|-------|-------|
| <i>Clostridioides difficile</i>                              | 0.53  | 1.32 | 0.35 | 0.36 | 0.26 | 1.16  | 0.31  |
| <i>Ca Colwellia aromaticivorans</i>                          | 1.15  | 0.99 | 1.13 | 1.63 | 4.07 | 0.43  | 0.07  |
| <i>Cycloclasticus sp 44_32_T64</i>                           | 0.01  | 1.52 | 1.33 | 0.16 | 0.32 | 0.24  | 1.36  |
| <i>Cycloclasticus sp symbiont of Bathymodiolus heckeriae</i> | 0.05  | 1.10 | 1.02 | 0.13 | 0.25 | 0.18  | 0.79  |
| <i>Cycloclasticus sp Phe_18</i>                              | 0.01  | 1.03 | 0.84 | 0.10 | 0.20 | 0.35  | 5.43  |
| <i>Hyphomonas sp BRH_c22</i>                                 | <0.01 | 0.02 | 0.02 | 3.25 | 0.23 | <0.01 | <0.01 |
| <i>Hyphomonas chukchiensis</i>                               | <0.01 | 0.01 | 0.03 | 2.88 | 1.44 | <0.01 | 0.02  |
| <i>Hyphomonas johnsonii</i>                                  | <0.01 | 0.01 | 0.01 | 2.15 | 0.15 | <0.01 | 0.01  |
| <i>Hyphomonas oceanitis</i>                                  | <0.01 | 0.01 | 0.03 | 2.83 | 1.38 | <0.01 | 0.02  |
| <i>Marinirhabdus gelatinilytica</i>                          | <0.01 | 0.03 | 0.10 | 0.09 | 1.84 | 0.01  | 0.01  |

| Species                               | SW0   | SW4   | SW8  | SWO4  | SWO8  | SWOB4 | SWOB8 |
|---------------------------------------|-------|-------|------|-------|-------|-------|-------|
| <i>Marinomonas primoryensis</i>       | 0.01  | 0.81  | 0.05 | 3.08  | 6.22  | 6.79  | 2.27  |
| <i>Neptunomonas japonica</i>          | 0.11  | 0.02  | 0.01 | 0.43  | 0.02  | 1.56  | 0.02  |
| <i>Nisaea denitrificans</i>           | 0.02  | 0.01  | 2.74 | 0.01  | 0.01  | 0.01  | 0.04  |
| <i>Oleispira antarctica</i>           | 0.17  | 0.09  | 0.18 | 0.02  | 0.10  | 4.35  | 0.03  |
| <i>Pacificibacter marinus</i>         | 0.02  | 0.59  | 0.53 | 4.27  | 2.22  | 0.05  | 0.16  |
| <i>Paraglaciecola polaris</i>         | 0.01  | 0.07  | 0.19 | 0.13  | 0.09  | 1.45  | 0.77  |
| <i>Paraperlucidibaca beakdonensis</i> | 0.02  | 0.01  | 0.01 | <0.01 | <0.01 | 3.38  | 14.57 |
| <i>Ca Pelagibacter sp IMCC9063</i>    | 0.05  | 0.05  | 1.08 | <0.01 | <0.01 | <0.01 | <0.01 |
| <i>Ca Pelagibacter ubique</i>         | 1.09  | <0.01 | 0.07 | <0.01 | 0.06  | <0.01 | <0.01 |
| <i>Pseudomonas fluorescens</i>        | 0.04  | 0.02  | 0.02 | 0.02  | 0.02  | 1.42  | 0.12  |
| <i>Pseudomonas pelagia</i>            | 0.01  | 0.01  | 0.31 | 0.61  | 1.49  | 0.72  | 0.70  |
| <i>Pseudomonas sabulinigri</i>        | 0.01  | 0.01  | 0.01 | 0.12  | 0.07  | 0.75  | 5.61  |
| <i>Pseudomonas salina</i>             | 0.02  | 0.02  | 0.32 | 5.17  | 0.03  | 5.49  | 3.65  |
| <i>Pseudomonas sp Y22</i>             | <0.01 | <0.01 | 0.07 | 0.14  | 1.14  | 0.16  | 0.17  |
| <i>Sphingorhabdus sp M41</i>          | <0.01 | 0.21  | 0.09 | 0.09  | 0.01  | 0.72  | 1.70  |
| <i>Sphingorhabdus sp YGSM121</i>      | <0.01 | 0.19  | 0.07 | 0.06  | <0.01 | 0.53  | 1.17  |
| <i>Ca Thioglobus singularis</i>       | 1.44  | <0.01 | 0.02 | 0.01  | 0.12  | <0.01 | <0.01 |
| <i>Thioglobus sp NP1</i>              | 1.33  | <0.01 | 0.02 | 0.01  | 0.11  | <0.01 | <0.01 |
| <i>Ulvibacter litoralis</i>           | <0.01 | 0.09  | 0.06 | 1.23  | 0.24  | 3.05  | 0.92  |

**Table S19.** The number of detected genera, proportions (%) and estimated abundances (copies/mL) of bacterial genera containing petroleum hydrocarbon degraders ( $n = 350$ ) in seawater (SW), oil contaminated seawater (SWO), and biostimulated oil contaminated seawater (SWOB) based on five taxonomic assignment methods (Kaiju with the NCBI-nr database, Kaiju with the MAR<sub>DB</sub> database, Kraken2 with the Standard Kraken 2 database, Bracken with the Standard Kraken 2 database, and amplicon-based sequencing with the SILVA database). The numbers in sample codes denote time in months.

|           | SW0 | SW4 | SW8 | SWO4 | SWO8 | SWOB4 | SWOB8 |
|-----------|-----|-----|-----|------|------|-------|-------|
| Genera    |     |     |     |      |      |       |       |
| Kaiju     | 338 | 338 | 338 | 338  | 338  | 338   | 338   |
| Kaiju/MAR | 226 | 226 | 226 | 226  | 226  | 226   | 226   |
| Kraken2   | 279 | 279 | 279 | 279  | 279  | 279   | 279   |
| Bracken   | 279 | 279 | 279 | 279  | 279  | 279   | 279   |



|                      | SW0                  | SW4                  | SW8                  | SWO4                 | SWO8                 | SWOB4                | SWOB8                |
|----------------------|----------------------|----------------------|----------------------|----------------------|----------------------|----------------------|----------------------|
| Amplicon             | 105                  | 111                  | 126                  | 120                  | 127                  | 117                  | 134                  |
| Proportions          |                      |                      |                      |                      |                      |                      |                      |
| Kaiju                | 26.56                | 36.69                | 36.46                | 58.94                | 54.75                | 83.92                | 78.13                |
| Kaiju/MAR            | 49.19                | 71.52                | 67.16                | 73.22                | 79.54                | 94.33                | 87.61                |
| Kraken2              | 55.84                | 72.03                | 67.84                | 76.79                | 83.21                | 95.44                | 87.65                |
| Bracken              | 54.81                | 73.33                | 66.49                | 74.36                | 80.93                | 94.22                | 87.17                |
| Amplicon             | 13.60                | 29.39                | 14.49                | 21.98                | 24.15                | 65.11                | 62.77                |
| Estimated abundances |                      |                      |                      |                      |                      |                      |                      |
| Kaiju                | 2.71×10 <sup>5</sup> | 1.37×10 <sup>6</sup> | 1.91×10 <sup>6</sup> | 1.71×10 <sup>6</sup> | 2.51×10 <sup>6</sup> | 6.95×10 <sup>7</sup> | 9.69×10 <sup>7</sup> |
| Kaiju/MAR            | 5.02×10 <sup>5</sup> | 2.66×10 <sup>6</sup> | 3.51×10 <sup>6</sup> | 2.13×10 <sup>6</sup> | 3.65×10 <sup>6</sup> | 7.81×10 <sup>7</sup> | 1.09×10 <sup>8</sup> |
| Kraken2              | 5.70×10 <sup>5</sup> | 2.68×10 <sup>6</sup> | 3.55×10 <sup>6</sup> | 2.23×10 <sup>6</sup> | 3.82×10 <sup>6</sup> | 7.90×10 <sup>7</sup> | 1.09×10 <sup>8</sup> |
| Bracken              | 5.59×10 <sup>5</sup> | 2.73×10 <sup>6</sup> | 3.48×10 <sup>6</sup> | 2.16×10 <sup>6</sup> | 3.71×10 <sup>6</sup> | 7.80×10 <sup>7</sup> | 1.08×10 <sup>8</sup> |
| Amplicon             | 1.39×10 <sup>5</sup> | 1.09×10 <sup>6</sup> | 7.58×10 <sup>5</sup> | 6.38×10 <sup>5</sup> | 1.11×10 <sup>6</sup> | 5.39×10 <sup>7</sup> | 7.78×10 <sup>7</sup> |

**Table S20.** Normalized hydrocarbon degradation related gene abundances presented as gene-specific reads per kilobase per genome equivalent (RPKG) in seawater (SW), oil-contaminated seawater (SWO), and biostimulated oil-contaminated seawater (SWOB). Numbers in sample codes denote time in months. Genes related to aliphatic, monoaromatic, polyaromatic, and various types of hydrocarbon compounds degradation are presented on pink, blue, yellow, and green background, respectively. Genes with abbreviations given in this study are supplemented with their KEGG code.

| Gene                |                  | RPKG |      |      |      |      |       |       |
|---------------------|------------------|------|------|------|------|------|-------|-------|
|                     |                  | SW0  | SW4  | SW8  | SWO4 | SWO8 | SWOB4 | SWOB8 |
| Aliphatic compounds | <i>alkB1_2</i>   | 0.36 | 0.79 | 0.62 | 0.53 | 0.52 | 0.85  | 0.87  |
|                     | <i>alkT/rubB</i> | 4.12 | 7.39 | 6.62 | 7.92 | 8.15 | 9.37  | 8.98  |
|                     | <i>almA</i>      | 2.33 | 1.68 | 1.55 | 1.77 | 1.63 | 1.99  | 2.08  |
|                     | <i>bmoB</i>      | 0.00 | 0.00 | 0.00 | 0.00 | 0.00 | 0.00  | 0.00  |
|                     | <i>bmoC</i>      | 0.74 | 1.40 | 1.57 | 1.61 | 1.52 | 2.91  | 2.28  |
|                     | <i>bmoD</i>      | 0.00 | 0.00 | 0.00 | 0.00 | 0.00 | 0.00  | 0.00  |
|                     | <i>bmoX</i>      | 0.04 | 0.16 | 0.08 | 0.06 | 0.05 | 0.21  | 0.22  |
|                     | <i>bmoY</i>      | 0.00 | 0.00 | 0.01 | 0.00 | 0.00 | 0.00  | 0.00  |
|                     | <i>bmoZ</i>      | 0.00 | 0.00 | 0.00 | 0.00 | 0.00 | 0.00  | 0.00  |
|                     | <i>ladA</i>      | 1.81 | 0.17 | 0.25 | 0.18 | 0.24 | 0.16  | 0.35  |
|                     | <i>MAH1</i>      | 0.27 | 0.54 | 0.46 | 0.43 | 0.28 | 0.23  | 0.40  |

| Gene                   |                       | RPKG  |       |       |       |       |       |       |
|------------------------|-----------------------|-------|-------|-------|-------|-------|-------|-------|
|                        | SW0                   | SW4   | SW8   | SWO4  | SWO8  | SWOB4 | SWOB8 |       |
|                        | <i>pmoA-amoA</i>      | 0.05  | 0.24  | 0.12  | 0.13  | 0.08  | 0.05  | 0.19  |
|                        | <i>pmoB-amoB</i>      | 0.04  | 0.18  | 0.05  | 0.05  | 0.07  | 0.06  | 0.08  |
|                        | <i>pmoC-amoC</i>      | 0.06  | 0.30  | 0.18  | 0.14  | 0.24  | 0.10  | 0.26  |
|                        | <i>prmA</i>           | 0.04  | 0.16  | 0.08  | 0.07  | 0.05  | 0.21  | 0.23  |
|                        | <i>prmB</i>           | 2.44  | 4.83  | 4.34  | 4.91  | 5.31  | 7.75  | 5.82  |
|                        | <i>prmC</i>           | 0.08  | 0.34  | 0.18  | 0.14  | 0.14  | 0.46  | 0.43  |
|                        | <i>prmD</i>           | 0.00  | 0.25  | 0.09  | 0.11  | 0.12  | 0.54  | 0.41  |
|                        | Sum                   | 12.37 | 18.45 | 16.22 | 18.04 | 18.39 | 24.89 | 22.60 |
| Monoaromatic compounds | <i>a-adh</i> (K00055) | 8.59  | 7.57  | 6.72  | 8.02  | 8.75  | 7.85  | 7.91  |
|                        | <i>ADH1</i> (K18857)  | 3.54  | 3.36  | 2.96  | 3.77  | 3.96  | 3.68  | 3.95  |
|                        | <i>bsdC1</i>          | 1.24  | 0.61  | 0.72  | 0.50  | 0.62  | 0.56  | 0.52  |
|                        | <i>bsdC2</i>          | 0.77  | 0.44  | 0.55  | 0.40  | 0.48  | 0.44  | 0.40  |
|                        | <i>bsdD</i>           | 0.00  | 0.27  | 0.19  | 0.14  | 0.10  | 0.28  | 0.36  |
|                        | <i>cymAa</i>          | 0.29  | 0.89  | 0.71  | 0.49  | 0.46  | 0.81  | 0.94  |
|                        | <i>cymAb</i>          | 1.21  | 2.69  | 2.46  | 2.72  | 2.70  | 4.52  | 3.35  |
|                        | <i>dmpK</i>           | 0.04  | 0.32  | 0.16  | 0.22  | 0.25  | 0.66  | 0.42  |
|                        | <i>dmpL</i>           | 0.06  | 0.26  | 0.17  | 0.15  | 0.15  | 0.30  | 0.36  |
|                        | <i>dmpM</i>           | 0.11  | 0.97  | 0.49  | 0.42  | 0.31  | 1.12  | 1.37  |
|                        | <i>dmpN</i>           | 0.05  | 0.22  | 0.10  | 0.11  | 0.06  | 0.22  | 0.30  |
|                        | <i>dmpO</i>           | 0.06  | 0.37  | 0.21  | 0.26  | 0.23  | 0.85  | 0.45  |
|                        | <i>dmpP</i>           | 2.44  | 4.62  | 4.15  | 4.70  | 4.91  | 7.68  | 5.40  |
|                        | <i>etbAa</i>          | 2.68  | 2.95  | 2.20  | 1.89  | 1.88  | 2.88  | 3.25  |
|                        | <i>etbAb</i>          | 0.52  | 3.43  | 2.31  | 1.70  | 2.05  | 3.62  | 4.16  |
|                        | <i>etbAc</i>          | 2.51  | 3.34  | 2.48  | 1.73  | 1.99  | 2.08  | 2.25  |
|                        | <i>hcaB</i>           | 35.21 | 31.47 | 29.13 | 32.78 | 36.36 | 33.12 | 36.03 |
|                        | <i>hcaC</i>           | 8.62  | 8.11  | 6.97  | 6.48  | 6.65  | 6.57  | 6.57  |
|                        | <i>hcaD</i>           | 5.19  | 8.77  | 7.59  | 9.17  | 9.12  | 10.01 | 9.60  |
|                        | <i>hcaE</i>           | 2.93  | 3.26  | 2.48  | 2.03  | 2.06  | 3.05  | 3.48  |
|                        | <i>hcaF</i>           | 0.34  | 2.99  | 2.05  | 1.42  | 1.37  | 3.21  | 3.76  |
|                        | <i>pchC</i>           | 0.07  | 0.07  | 0.10  | 0.11  | 0.25  | 0.11  | 0.19  |
|                        | <i>pchF</i>           | 1.63  | 1.74  | 1.38  | 1.69  | 2.03  | 1.37  | 1.50  |

| Gene                   |                       | RPKG   |        |        |        |        |        |        |
|------------------------|-----------------------|--------|--------|--------|--------|--------|--------|--------|
|                        |                       | SW0    | SW4    | SW8    | SWO4   | SWO8   | SWOB4  | SWOB8  |
|                        | <i>ped</i> (K14746)   | 35.03  | 31.15  | 28.20  | 32.01  | 35.41  | 32.57  | 36.23  |
|                        | <i>phe</i> (K03380)   | 0.89   | 1.15   | 0.84   | 0.99   | 1.23   | 1.33   | 1.35   |
|                        | <i>tmoA</i>           | 0.05   | 0.22   | 0.10   | 0.10   | 0.06   | 0.23   | 0.30   |
|                        | <i>tmoB</i>           | 0.08   | 0.38   | 0.11   | 0.13   | 0.07   | 0.13   | 0.49   |
|                        | <i>tmoC</i>           | 7.43   | 9.96   | 7.27   | 7.25   | 7.43   | 7.84   | 7.85   |
|                        | <i>tmoD</i>           | 0.10   | 0.84   | 0.39   | 0.42   | 0.27   | 0.97   | 1.19   |
|                        | <i>tmoE</i>           | 0.09   | 0.42   | 0.22   | 0.17   | 0.15   | 0.57   | 0.53   |
|                        | <i>tmoF</i>           | 2.72   | 5.06   | 4.44   | 5.17   | 5.41   | 8.06   | 5.89   |
|                        | <i>todA</i>           | 1.36   | 3.19   | 2.58   | 3.42   | 3.17   | 4.40   | 4.06   |
|                        | <i>todB</i>           | 1.54   | 1.22   | 0.75   | 0.59   | 0.91   | 1.30   | 1.50   |
|                        | <i>todC1</i>          | 2.31   | 2.76   | 2.02   | 1.82   | 1.71   | 2.72   | 3.10   |
|                        | <i>todC2</i>          | 0.28   | 2.49   | 1.44   | 1.08   | 1.12   | 2.29   | 2.95   |
|                        | <i>xylA</i>           | 1.84   | 3.62   | 3.27   | 3.73   | 3.98   | 6.34   | 4.55   |
|                        | <i>xylC</i>           | 8.04   | 9.87   | 7.45   | 10.27  | 11.31  | 11.86  | 9.96   |
|                        | <i>xylM</i>           | 0.33   | 1.03   | 0.76   | 0.55   | 0.51   | 0.89   | 0.99   |
|                        | Sum                   | 140.20 | 162.06 | 136.13 | 148.63 | 159.47 | 176.51 | 177.46 |
| Polyaromatic compounds | <i>CYP1A1</i>         | 1.03   | 0.85   | 0.79   | 1.05   | 0.75   | 0.55   | 1.01   |
|                        | <i>CYP1A2</i>         | 0.71   | 0.81   | 0.72   | 0.78   | 0.53   | 0.45   | 0.82   |
|                        | <i>CYP2A6</i>         | 0.19   | 0.43   | 0.37   | 0.36   | 0.27   | 0.20   | 0.30   |
|                        | <i>CYP3A4</i>         | 0.32   | 0.62   | 0.54   | 0.48   | 0.32   | 0.25   | 0.57   |
|                        | <i>gst</i> (K00799)   | 7.10   | 9.61   | 8.40   | 9.61   | 10.72  | 10.33  | 10.47  |
|                        | <i>GSTK1</i> (K13299) | 0.71   | 0.74   | 0.82   | 0.83   | 1.16   | 1.42   | 1.28   |
|                        | <i>HPGSD</i> (K04097) | 1.16   | 2.05   | 1.49   | 1.91   | 2.24   | 2.58   | 2.45   |
|                        | <i>nahB</i>           | 28.44  | 25.95  | 23.78  | 27.40  | 30.24  | 29.27  | 30.65  |
|                        | <i>nahC</i>           | 0.21   | 0.89   | 0.58   | 0.65   | 0.56   | 0.96   | 1.06   |
|                        | <i>nidA</i>           | 2.22   | 2.62   | 1.91   | 1.76   | 1.64   | 2.66   | 3.06   |
|                        | <i>nidB</i>           | 0.34   | 3.06   | 1.84   | 1.41   | 1.41   | 3.36   | 3.85   |
|                        | <i>phdK</i>           | 7.33   | 9.02   | 6.81   | 9.59   | 10.18  | 11.10  | 9.32   |
|                        | Sum                   | 49.77  | 56.66  | 48.05  | 55.83  | 60.02  | 63.12  | 64.85  |
| V                      | <i>adh</i> (K00001)   | 10.12  | 9.44   | 8.27   | 10.33  | 11.11  | 10.75  | 10.22  |

| Gene                 | RPKG         |              |              |              |              |              |              |
|----------------------|--------------|--------------|--------------|--------------|--------------|--------------|--------------|
|                      | SW0          | SW4          | SW8          | SW04         | SW08         | SWOB4        | SWOB8        |
| <i>adhE</i> (K04072) | 2.81         | 3.15         | 2.65         | 4.24         | 4.35         | 5.78         | 4.45         |
| <i>adhP</i> (K13953) | 8.88         | 7.83         | 6.91         | 8.51         | 9.16         | 8.61         | 8.48         |
| <i>ALDH</i> (K00128) | 4.92         | 5.94         | 4.50         | 6.19         | 6.82         | 6.93         | 5.96         |
| <i>chnB</i>          | 2.30         | 2.00         | 1.66         | 1.90         | 2.04         | 2.18         | 2.24         |
| <i>dbfA1</i>         | 2.47         | 2.97         | 2.19         | 1.96         | 1.82         | 2.87         | 3.25         |
| <i>dbfA2</i>         | 0.56         | 3.66         | 2.47         | 1.85         | 2.22         | 3.85         | 4.36         |
| <i>frmA</i>          | 4.37         | 3.91         | 3.43         | 4.21         | 4.69         | 4.11         | 4.23         |
| <i>ligA</i>          | 0.46         | 0.28         | 0.28         | 0.24         | 0.37         | 0.48         | 0.51         |
| <i>ligB</i>          | 0.47         | 0.29         | 0.27         | 0.25         | 0.33         | 0.60         | 0.48         |
| <i>nagG</i>          | 2.76         | 3.03         | 2.33         | 2.01         | 1.85         | 3.15         | 3.41         |
| <i>nagH</i>          | 0.69         | 2.36         | 1.47         | 1.16         | 1.11         | 2.17         | 2.92         |
| <i>nahAa</i>         | 2.60         | 4.99         | 4.42         | 5.04         | 5.35         | 8.23         | 5.93         |
| <i>nahAb</i>         | 3.78         | 6.24         | 4.10         | 3.54         | 3.73         | 3.96         | 3.15         |
| <i>nahAc</i>         | 2.28         | 2.75         | 2.08         | 1.84         | 1.70         | 2.70         | 3.06         |
| <i>nahAd</i>         | 0.14         | 1.91         | 1.04         | 0.78         | 0.86         | 1.89         | 2.50         |
| <i>nmsA</i>          | 0.00         | 0.00         | 0.00         | 0.01         | 0.00         | 0.04         | 0.00         |
| <i>nmsB</i>          | 0.00         | 0.00         | 0.00         | 0.00         | 0.00         | 0.00         | 0.00         |
| <i>nmsC</i>          | 0.00         | 0.00         | 0.00         | 0.00         | 0.00         | 0.00         | 0.00         |
| <i>pcaG</i>          | 0.76         | 1.09         | 0.64         | 0.68         | 1.36         | 0.74         | 0.76         |
| <i>pcaH</i>          | 0.36         | 0.60         | 0.37         | 0.30         | 0.59         | 0.32         | 0.37         |
| <i>phdE</i>          | 18.38        | 16.31        | 14.81        | 17.43        | 19.41        | 18.44        | 20.79        |
| <i>phdI</i>          | 0.33         | 0.06         | 0.23         | 0.02         | 0.06         | 0.10         | 0.12         |
| <i>phdJ</i>          | 1.11         | 1.47         | 1.20         | 1.21         | 1.30         | 1.52         | 1.43         |
| <i>sdh</i> (K00480)  | 2.90         | 4.13         | 2.96         | 4.07         | 4.20         | 4.36         | 3.97         |
| <i>yiaY</i>          | 1.20         | 1.35         | 1.24         | 2.20         | 1.90         | 2.76         | 1.83         |
| <b>Sum</b>           | <b>74.67</b> | <b>85.75</b> | <b>69.53</b> | <b>79.97</b> | <b>86.33</b> | <b>96.56</b> | <b>94.40</b> |

**Table S21.** The clustering of good quality (completeness >50%, contamination <10%) metagenome assembled genomes (MAGs) based on their average nucleotide identity (ANI) score along with their oil hydrocarbon degradation gene profiles. MAG affiliations are based on Kaiju with the NCBI-nr database.

Genes related to aliphatic, monoaromatic, polyaromatic, and various types of hydrocarbon compounds degradation are presented on pink, blue, yellow, and green background, respectively.

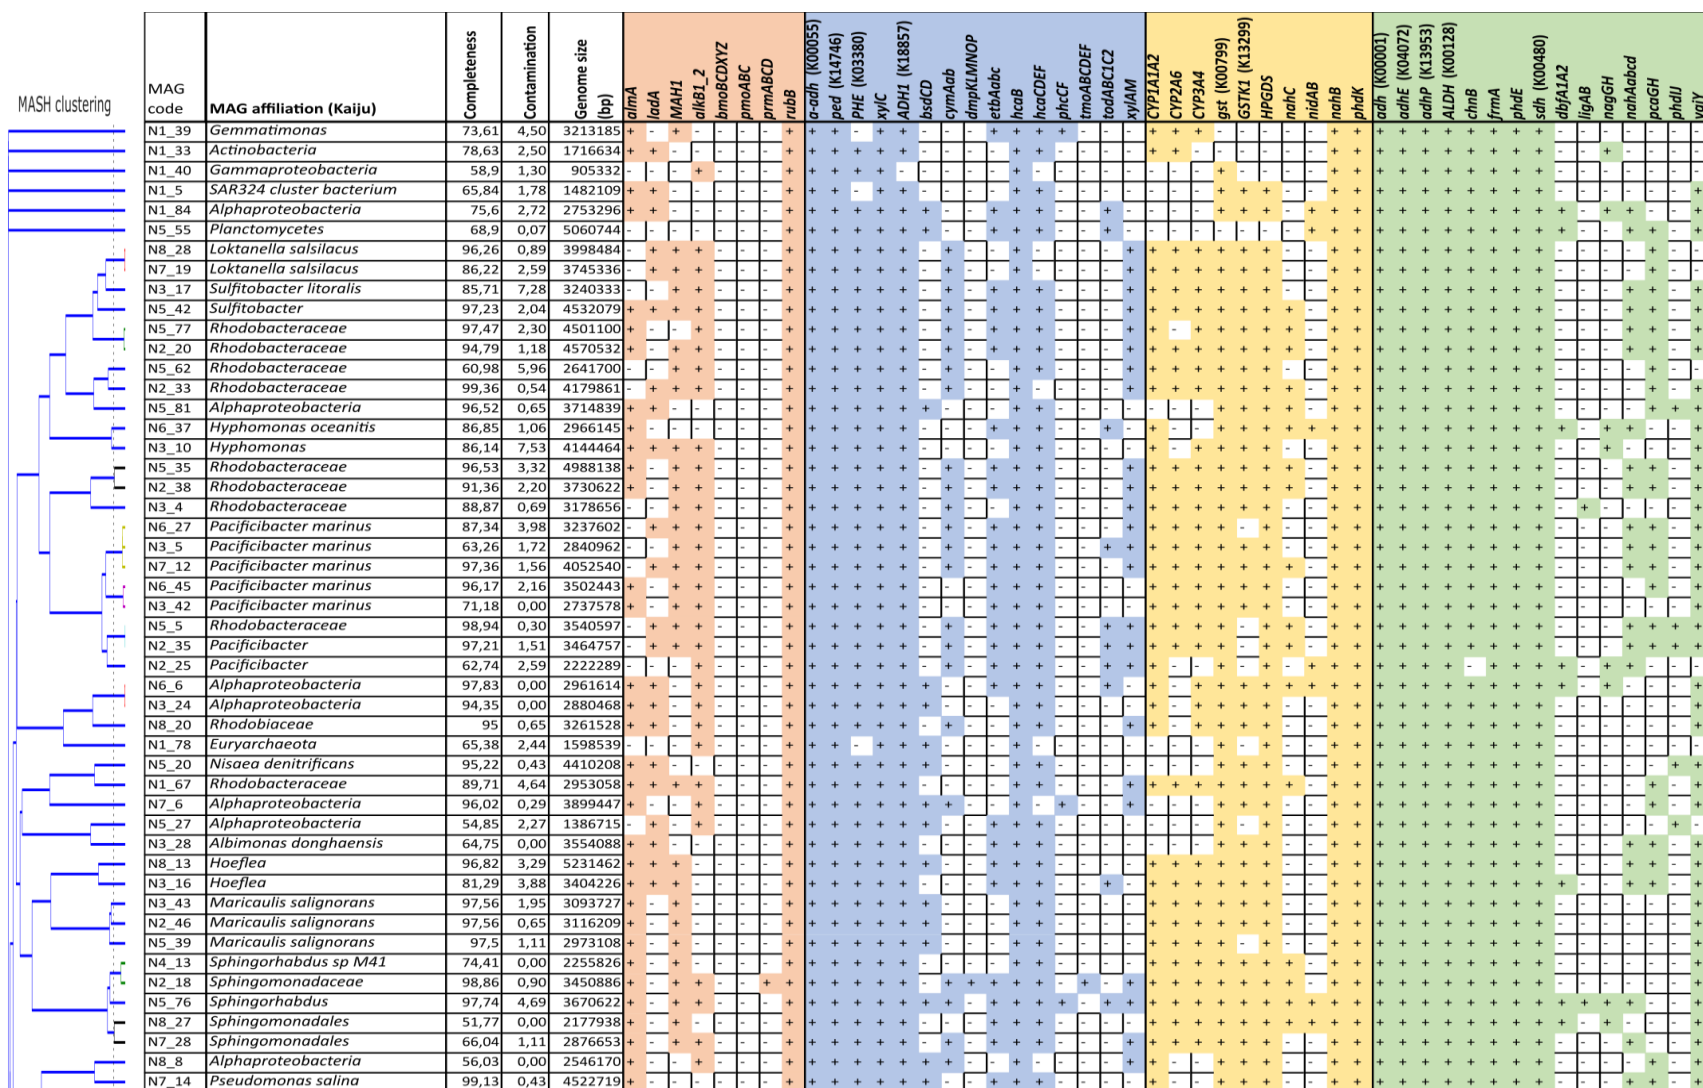

| MAG code | MAG affiliation (Kaiju) | Completeness | Contamination | Genome size (bp) | almA | lcaA | MAH1 | alkB1_2 | bmoBCDXYZ | pmoABC | prmA | prnA | prnB | prnD | prnE | prnF | prnG | prnH | prnI | prnJ | prnK | prnL | prnM | prnN | prnO | prnP | prnQ | prnR | prnS | prnT | prnU | prnV | prnW | prnX | prnY | prnZ | prnAA | prnAB | prnAC | prnAD | prnAE | prnAF | prnAG | prnAH | prnAI | prnAJ | prnAK | prnAL | prnAM | prnAN | prnAO | prnAP | prnAQ | prnAR | prnAS | prnAT | prnAU | prnAV | prnAW | prnAX | prnAY | prnAZ | prnBA | prnBB | prnBC | prnBD | prnBE | prnBF | prnBG | prnBH | prnBI | prnBJ | prnBK | prnBL | prnBM | prnBN | prnBO | prnBP | prnBQ | prnBR | prnBS | prnBT | prnBU | prnBV | prnBW | prnBX | prnBY | prnBZ | prnC | prnD | prnE | prnF | prnG | prnH | prnI | prnJ | prnK | prnL | prnM | prnN | prnO | prnP | prnQ | prnR | prnS | prnT | prnU | prnV | prnW | prnX | prnY | prnZ | prnAA | prnAB | prnAC | prnAD | prnAE | prnAF | prnAG | prnAH | prnAI | prnAJ | prnAK | prnAL | prnAM | prnAN | prnAO | prnAP | prnAQ | prnAR | prnAS | prnAT | prnAU | prnAV | prnAW | prnAX | prnAY | prnAZ | prnBA | prnBB | prnBC | prnBD | prnBE | prnBF | prnBG | prnBH | prnBI | prnBJ | prnBK | prnBL | prnBM | prnBN | prnBO | prnBP | prnBQ | prnBR | prnBS | prnBT | prnBU | prnBV | prnBW | prnBX | prnBY | prnBZ | prnC | prnD | prnE | prnF | prnG | prnH | prnI | prnJ | prnK | prnL | prnM | prnN | prnO | prnP | prnQ | prnR | prnS | prnT | prnU | prnV | prnW | prnX | prnY | prnZ | prnAA | prnAB | prnAC | prnAD | prnAE | prnAF | prnAG | prnAH | prnAI | prnAJ | prnAK | prnAL | prnAM | prnAN | prnAO | prnAP | prnAQ | prnAR | prnAS | prnAT | prnAU | prnAV | prnAW | prnAX | prnAY | prnAZ | prnBA | prnBB | prnBC | prnBD | prnBE | prnBF | prnBG | prnBH | prnBI | prnBJ | prnBK | prnBL | prnBM | prnBN | prnBO | prnBP | prnBQ | prnBR | prnBS | prnBT | prnBU | prnBV | prnBW | prnBX | prnBY | prnBZ | prnC | prnD | prnE | prnF | prnG | prnH | prnI | prnJ | prnK | prnL | prnM | prnN | prnO | prnP | prnQ | prnR | prnS | prnT | prnU | prnV | prnW | prnX | prnY | prnZ | prnAA | prnAB | prnAC | prnAD | prnAE | prnAF | prnAG | prnAH | prnAI | prnAJ | prnAK | prnAL | prnAM | prnAN | prnAO | prnAP | prnAQ | prnAR | prnAS | prnAT | prnAU | prnAV | prnAW | prnAX | prnAY | prnAZ | prnBA | prnBB | prnBC | prnBD | prnBE | prnBF | prnBG | prnBH | prnBI | prnBJ | prnBK | prnBL | prnBM | prnBN | prnBO | prnBP | prnBQ | prnBR | prnBS | prnBT | prnBU | prnBV | prnBW | prnBX | prnBY | prnBZ | prnC | prnD | prnE | prnF | prnG | prnH | prnI | prnJ | prnK | prnL | prnM | prnN | prnO | prnP | prnQ | prnR | prnS | prnT | prnU | prnV | prnW | prnX | prnY | prnZ | prnAA | prnAB | prnAC | prnAD | prnAE | prnAF | prnAG | prnAH | prnAI | prnAJ | prnAK | prnAL | prnAM | prnAN | prnAO | prnAP | prnAQ | prnAR | prnAS | prnAT | prnAU | prnAV | prnAW | prnAX | prnAY | prnAZ | prnBA | prnBB | prnBC | prnBD | prnBE | prnBF | prnBG | prnBH | prnBI | prnBJ | prnBK | prnBL | prnBM | prnBN | prnBO | prnBP | prnBQ | prnBR | prnBS | prnBT | prnBU | prnBV | prnBW | prnBX | prnBY | prnBZ | prnC | prnD | prnE | prnF | prnG | prnH | prnI | prnJ | prnK | prnL | prnM | prnN | prnO | prnP | prnQ | prnR | prnS | prnT | prnU | prnV | prnW | prnX | prnY | prnZ | prnAA | prnAB | prnAC | prnAD | prnAE | prnAF | prnAG | prnAH | prnAI | prnAJ | prnAK | prnAL | prnAM | prnAN | prnAO | prnAP | prnAQ | prnAR | prnAS | prnAT | prnAU | prnAV | prnAW | prnAX | prnAY | prnAZ | prnBA | prnBB | prnBC | prnBD | prnBE | prnBF | prnBG | prnBH | prnBI | prnBJ | prnBK | prnBL | prnBM | prnBN | prnBO | prnBP | prnBQ | prnBR | prnBS | prnBT | prnBU | prnBV | prnBW | prnBX | prnBY | prnBZ | prnC | prnD | prnE | prnF | prnG | prnH | prnI | prnJ | prnK | prnL | prnM | prnN | prnO | prnP | prnQ | prnR | prnS | prnT | prnU | prnV | prnW | prnX | prnY | prnZ | prnAA | prnAB | prnAC | prnAD | prnAE | prnAF | prnAG | prnAH | prnAI | prnAJ | prnAK | prnAL | prnAM | prnAN | prnAO | prnAP | prnAQ | prnAR | prnAS | prnAT | prnAU | prnAV | prnAW | prnAX | prnAY | prnAZ | prnBA | prnBB | prnBC | prnBD | prnBE | prnBF | prnBG | prnBH | prnBI | prnBJ | prnBK | prnBL | prnBM | prnBN | prnBO | prnBP | prnBQ | prnBR | prnBS | prnBT | prnBU | prnBV | prnBW | prnBX | prnBY | prnBZ | prnC | prnD | prnE | prnF | prnG | prnH | prnI | prnJ | prnK | prnL | prnM | prnN | prnO | prnP | prnQ | prnR | prnS | prnT | prnU | prnV | prnW | prnX | prnY | prnZ | prnAA | prnAB | prnAC | prnAD | prnAE | prnAF | prnAG | prnAH | prnAI | prnAJ | prnAK | prnAL | prnAM | prnAN | prnAO | prnAP | prnAQ | prnAR | prnAS | prnAT | prnAU | prnAV | prnAW | prnAX | prnAY | prnAZ | prnBA | prnBB | prnBC | prnBD | prnBE | prnBF | prnBG | prnBH | prnBI | prnBJ | prnBK | prnBL | prnBM | prnBN | prnBO | prnBP | prnBQ | prnBR | prnBS | prnBT | prnBU | prnBV | prnBW | prnBX | prnBY | prnBZ | prnC | prnD | prnE | prnF | prnG | prnH | prnI | prnJ | prnK | prnL | prnM | prnN | prnO | prnP | prnQ | prnR | prnS | prnT | prnU | prnV | prnW | prnX | prnY | prnZ | prnAA | prnAB | prnAC | prnAD | prnAE | prnAF | prnAG | prnAH | prnAI | prnAJ | prnAK | prnAL | prnAM | prnAN | prnAO | prnAP | prnAQ | prnAR | prnAS | prnAT | prnAU | prnAV | prnAW | prnAX | prnAY | prnAZ | prnBA | prnBB | prnBC | prnBD | prnBE | prnBF | prnBG | prnBH | prnBI | prnBJ | prnBK | prnBL | prnBM | prnBN | prnBO | prnBP | prnBQ | prnBR | prnBS | prnBT | prnBU | prnBV | prnBW | prnBX | prnBY | prnBZ | prnC | prnD | prnE | prnF | prnG | prnH | prnI | prnJ | prnK | prnL | prnM | prnN | prnO | prnP | prnQ | prnR | prnS | prnT | prnU | prnV | prnW | prnX | prnY | prnZ | prnAA | prnAB | prnAC | prnAD | prnAE | prnAF | prnAG | prnAH | prnAI | prnAJ | prnAK | prnAL | prnAM | prnAN | prnAO | prnAP | prnAQ | prnAR | prnAS | prnAT | prnAU | prnAV | prnAW | prnAX | prnAY | prnAZ | prnBA | prnBB | prnBC | prnBD | prnBE | prnBF | prnBG | prnBH | prnBI | prnBJ | prnBK | prnBL | prnBM | prnBN | prnBO | prnBP | prnBQ | prnBR | prnBS | prnBT | prnBU | prnBV | prnBW | prnBX | prnBY | prnBZ | prnC | prnD | prnE | prnF | prnG | prnH | prnI | prnJ | prnK | prnL | prnM | prnN | prnO | prnP | prnQ | prnR | prnS | prnT | prnU | prnV | prnW | prnX | prnY | prnZ | prnAA | prnAB | prnAC | prnAD | prnAE | prnAF | prnAG | prnAH | prnAI | prnAJ | prnAK | prnAL | prnAM | prnAN | prnAO | prnAP | prnAQ | prnAR | prnAS | prnAT | prnAU | prnAV | prnAW | prnAX | prnAY | prnAZ | prnBA | prnBB | prnBC | prnBD | prnBE | prnBF | prnBG | prnBH | prnBI | prnBJ | prnBK | prnBL | prnBM | prnBN | prnBO | prnBP | prnBQ | prnBR | prnBS | prnBT | prnBU | prnBV | prnBW | prnBX | prnBY | prnBZ | prnC | prnD | prnE | prnF | prnG | prnH | prnI | prnJ | prnK | prnL | prnM | prnN | prnO | prnP | prnQ | prnR | prnS | prnT | prnU | prnV | prnW | prnX | prnY | prnZ | prnAA | prnAB | prnAC | prnAD | prnAE | prnAF | prnAG | prnAH | prnAI | prnAJ | prnAK | prnAL | prnAM | prnAN | prnAO | prnAP | prnAQ | prnAR | prnAS | prnAT | prnAU | prnAV | prnAW | prnAX | prnAY | prnAZ | prnBA | prnBB | prnBC | prnBD | prnBE | prnBF | prnBG | prnBH | prnBI | prnBJ | prnBK | prnBL | prnBM | prnBN | prnBO | prnBP | prnBQ | prnBR | prnBS | prnBT | prnBU | prnBV | prnBW | prnBX | prnBY | prnBZ | prnC | prnD | prnE | prnF | prnG | prnH | prnI | prnJ | prnK | prnL | prnM | prnN | prnO | prnP | prnQ | prnR | prnS | prnT | prnU | prnV | prnW | prnX | prnY | prnZ | prnAA | prnAB | prnAC | prnAD | prnAE | prnAF | prnAG | prnAH | prnAI | prnAJ | prnAK | prnAL | prnAM | prnAN | prnAO | prnAP | prnAQ | prnAR | prnAS | prnAT | prnAU | prnAV | prnAW | prnAX | prnAY | prnAZ | prnBA | prnBB | prnBC | prnBD | prnBE | prnBF | prnBG | prnBH | prnBI | prnBJ | prnBK | prnBL | prnBM | prnBN | prnBO | prnBP | prnBQ | prnBR | prnBS | prnBT | prnBU | prnBV | prnBW | prnBX | prnBY | prnBZ | prnC | prnD | prnE | prnF | prnG | prnH | prnI | prnJ | prnK | prnL | prnM | prnN | prnO | prnP | prnQ | prnR | prnS | prnT | prnU | prnV | prnW | prnX | prnY | prnZ | prnAA | prnAB | prnAC | prnAD | prnAE | prnAF | prnAG | prnAH | prnAI | prnAJ | prnAK | prnAL | prnAM | prnAN | prnAO | prnAP | prnAQ | prnAR | prnAS | prnAT | prnAU | prnAV | prnAW | prnAX | prnAY | prnAZ | prnBA | prnBB | prnBC | prnBD | prnBE | prnBF | prnBG | prnBH | prnBI | prnBJ | prnBK | prnBL | prnBM | prnBN | prnBO | prnBP | prnBQ | prnBR | prnBS | prnBT | prnBU | prnBV | prnBW | prnBX | prnBY | prnBZ | prnC | prnD | prnE | prnF | prnG | prnH | prnI | prnJ | prnK | prnL | prnM | prnN | prnO | prnP | prnQ | prnR | prnS | prnT | prnU | prnV | prnW | prnX | prnY | prnZ | prnAA | prnAB | prnAC | prnAD | prnAE | prnAF | prnAG | prnAH | prnAI | prnAJ | prnAK | prnAL | prnAM | prnAN | prnAO | prnAP | prnAQ | prnAR | prnAS | prnAT | prnAU | prnAV | prnAW | prnAX | prnAY | prnAZ | prnBA | prnBB | prnBC | prnBD | prnBE | prnBF | prnBG | prnBH | prnBI | prnBJ | prnBK | prnBL | prnBM | prnBN | prnBO | prnBP | prnBQ | prnBR | prnBS | prnBT | prnBU | prnBV | prnBW | prnBX | prnBY | prnBZ | prnC | prnD | prnE | prnF | prnG | prnH | prnI | prnJ | prnK | prnL | prnM | prnN | prnO | prnP | prnQ | prnR | prnS | prnT | prnU | prnV | prnW | prnX | prnY | prnZ | prnAA | prnAB | prnAC | prnAD | prnAE | prnAF | prnAG | prnAH | prnAI | prnAJ | prnAK | prnAL | prnAM | prnAN | prnAO | prnAP | prnAQ | prnAR | prnAS | prnAT | prnAU | prnAV | prnAW | prnAX | prnAY | prnAZ | prnBA | prnBB | prnBC | prnBD | prnBE | prnBF | prnBG | prnBH | prnBI | prnBJ | prnBK | prnBL | prnBM | prnBN | prnBO | prnBP | prnBQ | prnBR | prnBS | prnBT | prnBU | prnBV | prnBW | prnBX | prnBY | prnBZ | prnC | prnD | prnE | prnF | prnG | prnH | prnI | prnJ | prnK | prnL | prnM | prnN | prnO | prnP | prnQ | prnR | prnS | prnT | prnU | prnV | prnW | prnX | prnY | prnZ | prnAA | prnAB | prnAC | prnAD | prnAE | prnAF | prnAG | prnAH | prnAI | prnAJ | prnAK | prnAL | prnAM | prnAN | prnAO | prnAP | prnAQ | prnAR | prnAS | prnAT | prnAU | prnAV | prnAW | prnAX | prnAY | prnAZ | prnBA | prnBB | prnBC | prnBD | prnBE | prnBF | prnBG | prnBH | prnBI | prnBJ | prnBK | prnBL | prnBM | prnBN | prnBO | prnBP | prnBQ | prnBR | prnBS | prnBT | prnBU | prnBV | prnBW | prnBX | prnBY | prnBZ | prnC | prnD | prnE | prnF | prnG | prnH | prnI | prnJ | prnK | prnL | prnM | prnN | prnO | prnP | prnQ | prnR | prnS | prnT | prnU | prnV | prnW | prnX | prnY | prnZ | prnAA | prnAB | prnAC | prnAD | prnAE | prnAF | prnAG | prnAH | prnAI | prnAJ | prnAK | prnAL | prnAM | prnAN | prnAO | prnAP | prnAQ | prnAR | prnAS | prnAT | prnAU | prnAV | prnAW | prnAX | prnAY | prnAZ | prnBA | prnBB | prnBC | prnBD | prnBE | prnBF | prnBG | prnBH | prnBI | prnBJ | prnBK | prnBL | prnBM | prnBN | prnBO | prnBP | prnBQ | prnBR | prnBS | prnBT | prnBU | prnBV | prnBW | prnBX | prnBY | prnBZ | prnC | prnD | prnE | prnF | prnG | prnH | prnI | prnJ | prnK | prnL | prnM | prnN | prnO | prnP | prnQ | prnR | prnS | prnT | prnU | prnV | prnW | prnX | prnY | prnZ | prnAA | prnAB | prnAC | prnAD | prnAE | prnAF | prnAG | prnAH | prnAI | prnAJ | prnAK | prnAL | prnAM | prnAN | prnAO | prnAP | prnAQ | prnAR | prnAS | prnAT | prnAU | prnAV | prnAW | prnAX | prnAY | prnAZ | prnBA | prnBB | prnBC | prnBD | prnBE | prnBF | prnBG | prnBH | prnBI | prnBJ | prnBK | prnBL | prnBM | prnBN | prnBO | prnBP | prnBQ | prnBR | prnBS | prnBT | prnBU | prnBV | prnBW | prnBX | prnBY | prnBZ | prnC | prnD | prnE | prnF | prnG | prnH | prnI | prnJ | prnK | prnL | prnM | prnN | prnO | prnP | prnQ | prnR | prnS | prnT | prnU | prnV | prnW | prnX | prnY | prnZ | prnAA | prnAB | prnAC | prnAD | prnAE | prnAF | prnAG | prnAH | prnAI | prnAJ | prnAK | prnAL | prnAM | prnAN | prnAO | prnAP | prnAQ | prnAR | prnAS | prnAT | prnAU | prnAV | prnAW | prnAX | prnAY | prnAZ | prnBA | prnBB | prnBC | prnBD | prnBE | prnBF | prnBG | prnBH | prnBI | prnBJ | prnBK | prnBL | prnBM | prnBN | prnBO | prnBP | prnBQ | prnBR | prnBS | prnBT | prnBU | prnBV | prnBW | prnBX | prnBY | prnBZ | prnC | prnD | prnE | prnF | prnG | prnH | prnI | prnJ | prnK | prnL | prnM | prnN | prnO | prnP |  |
|----------|-------------------------|--------------|---------------|------------------|------|------|------|---------|-----------|--------|------|------|------|------|------|------|------|------|------|------|------|------|------|------|------|------|------|------|------|------|------|------|------|------|------|------|-------|-------|-------|-------|-------|-------|-------|-------|-------|-------|-------|-------|-------|-------|-------|-------|-------|-------|-------|-------|-------|-------|-------|-------|-------|-------|-------|-------|-------|-------|-------|-------|-------|-------|-------|-------|-------|-------|-------|-------|-------|-------|-------|-------|-------|-------|-------|-------|-------|-------|-------|-------|------|------|------|------|------|------|------|------|------|------|------|------|------|------|------|------|------|------|------|------|------|------|------|------|-------|-------|-------|-------|-------|-------|-------|-------|-------|-------|-------|-------|-------|-------|-------|-------|-------|-------|-------|-------|-------|-------|-------|-------|-------|-------|-------|-------|-------|-------|-------|-------|-------|-------|-------|-------|-------|-------|-------|-------|-------|-------|-------|-------|-------|-------|-------|-------|-------|-------|-------|-------|------|------|------|------|------|------|------|------|------|------|------|------|------|------|------|------|------|------|------|------|------|------|------|------|-------|-------|-------|-------|-------|-------|-------|-------|-------|-------|-------|-------|-------|-------|-------|-------|-------|-------|-------|-------|-------|-------|-------|-------|-------|-------|-------|-------|-------|-------|-------|-------|-------|-------|-------|-------|-------|-------|-------|-------|-------|-------|-------|-------|-------|-------|-------|-------|-------|-------|-------|-------|------|------|------|------|------|------|------|------|------|------|------|------|------|------|------|------|------|------|------|------|------|------|------|------|-------|-------|-------|-------|-------|-------|-------|-------|-------|-------|-------|-------|-------|-------|-------|-------|-------|-------|-------|-------|-------|-------|-------|-------|-------|-------|-------|-------|-------|-------|-------|-------|-------|-------|-------|-------|-------|-------|-------|-------|-------|-------|-------|-------|-------|-------|-------|-------|-------|-------|-------|-------|------|------|------|------|------|------|------|------|------|------|------|------|------|------|------|------|------|------|------|------|------|------|------|------|-------|-------|-------|-------|-------|-------|-------|-------|-------|-------|-------|-------|-------|-------|-------|-------|-------|-------|-------|-------|-------|-------|-------|-------|-------|-------|-------|-------|-------|-------|-------|-------|-------|-------|-------|-------|-------|-------|-------|-------|-------|-------|-------|-------|-------|-------|-------|-------|-------|-------|-------|-------|------|------|------|------|------|------|------|------|------|------|------|------|------|------|------|------|------|------|------|------|------|------|------|------|-------|-------|-------|-------|-------|-------|-------|-------|-------|-------|-------|-------|-------|-------|-------|-------|-------|-------|-------|-------|-------|-------|-------|-------|-------|-------|-------|-------|-------|-------|-------|-------|-------|-------|-------|-------|-------|-------|-------|-------|-------|-------|-------|-------|-------|-------|-------|-------|-------|-------|-------|-------|------|------|------|------|------|------|------|------|------|------|------|------|------|------|------|------|------|------|------|------|------|------|------|------|-------|-------|-------|-------|-------|-------|-------|-------|-------|-------|-------|-------|-------|-------|-------|-------|-------|-------|-------|-------|-------|-------|-------|-------|-------|-------|-------|-------|-------|-------|-------|-------|-------|-------|-------|-------|-------|-------|-------|-------|-------|-------|-------|-------|-------|-------|-------|-------|-------|-------|-------|-------|------|------|------|------|------|------|------|------|------|------|------|------|------|------|------|------|------|------|------|------|------|------|------|------|-------|-------|-------|-------|-------|-------|-------|-------|-------|-------|-------|-------|-------|-------|-------|-------|-------|-------|-------|-------|-------|-------|-------|-------|-------|-------|-------|-------|-------|-------|-------|-------|-------|-------|-------|-------|-------|-------|-------|-------|-------|-------|-------|-------|-------|-------|-------|-------|-------|-------|-------|-------|------|------|------|------|------|------|------|------|------|------|------|------|------|------|------|------|------|------|------|------|------|------|------|------|-------|-------|-------|-------|-------|-------|-------|-------|-------|-------|-------|-------|-------|-------|-------|-------|-------|-------|-------|-------|-------|-------|-------|-------|-------|-------|-------|-------|-------|-------|-------|-------|-------|-------|-------|-------|-------|-------|-------|-------|-------|-------|-------|-------|-------|-------|-------|-------|-------|-------|-------|-------|------|------|------|------|------|------|------|------|------|------|------|------|------|------|------|------|------|------|------|------|------|------|------|------|-------|-------|-------|-------|-------|-------|-------|-------|-------|-------|-------|-------|-------|-------|-------|-------|-------|-------|-------|-------|-------|-------|-------|-------|-------|-------|-------|-------|-------|-------|-------|-------|-------|-------|-------|-------|-------|-------|-------|-------|-------|-------|-------|-------|-------|-------|-------|-------|-------|-------|-------|-------|------|------|------|------|------|------|------|------|------|------|------|------|------|------|------|------|------|------|------|------|------|------|------|------|-------|-------|-------|-------|-------|-------|-------|-------|-------|-------|-------|-------|-------|-------|-------|-------|-------|-------|-------|-------|-------|-------|-------|-------|-------|-------|-------|-------|-------|-------|-------|-------|-------|-------|-------|-------|-------|-------|-------|-------|-------|-------|-------|-------|-------|-------|-------|-------|-------|-------|-------|-------|------|------|------|------|------|------|------|------|------|------|------|------|------|------|------|------|------|------|------|------|------|------|------|------|-------|-------|-------|-------|-------|-------|-------|-------|-------|-------|-------|-------|-------|-------|-------|-------|-------|-------|-------|-------|-------|-------|-------|-------|-------|-------|-------|-------|-------|-------|-------|-------|-------|-------|-------|-------|-------|-------|-------|-------|-------|-------|-------|-------|-------|-------|-------|-------|-------|-------|-------|-------|------|------|------|------|------|------|------|------|------|------|------|------|------|------|------|------|------|------|------|------|------|------|------|------|-------|-------|-------|-------|-------|-------|-------|-------|-------|-------|-------|-------|-------|-------|-------|-------|-------|-------|-------|-------|-------|-------|-------|-------|-------|-------|-------|-------|-------|-------|-------|-------|-------|-------|-------|-------|-------|-------|-------|-------|-------|-------|-------|-------|-------|-------|-------|-------|-------|-------|-------|-------|------|------|------|------|------|------|------|------|------|------|------|------|------|------|------|------|------|------|------|------|------|------|------|------|-------|-------|-------|-------|-------|-------|-------|-------|-------|-------|-------|-------|-------|-------|-------|-------|-------|-------|-------|-------|-------|-------|-------|-------|-------|-------|-------|-------|-------|-------|-------|-------|-------|-------|-------|-------|-------|-------|-------|-------|-------|-------|-------|-------|-------|-------|-------|-------|-------|-------|-------|-------|------|------|------|------|------|------|------|------|------|------|------|------|------|------|------|------|------|------|------|------|------|------|------|------|-------|-------|-------|-------|-------|-------|-------|-------|-------|-------|-------|-------|-------|-------|-------|-------|-------|-------|-------|-------|-------|-------|-------|-------|-------|-------|-------|-------|-------|-------|-------|-------|-------|-------|-------|-------|-------|-------|-------|-------|-------|-------|-------|-------|-------|-------|-------|-------|-------|-------|-------|-------|------|------|------|------|------|------|------|------|------|------|------|------|------|------|------|------|------|------|------|------|------|------|------|------|-------|-------|-------|-------|-------|-------|-------|-------|-------|-------|-------|-------|-------|-------|-------|-------|-------|-------|-------|-------|-------|-------|-------|-------|-------|-------|-------|-------|-------|-------|-------|-------|-------|-------|-------|-------|-------|-------|-------|-------|-------|-------|-------|-------|-------|-------|-------|-------|-------|-------|-------|-------|------|------|------|------|------|------|------|------|------|------|------|------|------|------|------|------|------|------|------|------|------|------|------|------|-------|-------|-------|-------|-------|-------|-------|-------|-------|-------|-------|-------|-------|-------|-------|-------|-------|-------|-------|-------|-------|-------|-------|-------|-------|-------|-------|-------|-------|-------|-------|-------|-------|-------|-------|-------|-------|-------|-------|-------|-------|-------|-------|-------|-------|-------|-------|-------|-------|-------|-------|-------|------|------|------|------|------|------|------|------|------|------|------|------|------|------|------|------|------|------|------|------|------|------|------|------|-------|-------|-------|-------|-------|-------|-------|-------|-------|-------|-------|-------|-------|-------|-------|-------|-------|-------|-------|-------|-------|-------|-------|-------|-------|-------|-------|-------|-------|-------|-------|-------|-------|-------|-------|-------|-------|-------|-------|-------|-------|-------|-------|-------|-------|-------|-------|-------|-------|-------|-------|-------|------|------|------|------|------|------|------|------|------|------|------|------|------|------|------|------|------|------|------|------|------|------|------|------|-------|-------|-------|-------|-------|-------|-------|-------|-------|-------|-------|-------|-------|-------|-------|-------|-------|-------|-------|-------|-------|-------|-------|-------|-------|-------|-------|-------|-------|-------|-------|-------|-------|-------|-------|-------|-------|-------|-------|-------|-------|-------|-------|-------|-------|-------|-------|-------|-------|-------|-------|-------|------|------|------|------|------|------|------|------|------|------|------|------|------|------|------|------|------|------|------|------|------|------|------|------|-------|-------|-------|-------|-------|-------|-------|-------|-------|-------|-------|-------|-------|-------|-------|-------|-------|-------|-------|-------|-------|-------|-------|-------|-------|-------|-------|-------|-------|-------|-------|-------|-------|-------|-------|-------|-------|-------|-------|-------|-------|-------|-------|-------|-------|-------|-------|-------|-------|-------|-------|-------|------|------|------|------|------|------|------|------|------|------|------|------|------|------|--|
|----------|-------------------------|--------------|---------------|------------------|------|------|------|---------|-----------|--------|------|------|------|------|------|------|------|------|------|------|------|------|------|------|------|------|------|------|------|------|------|------|------|------|------|------|-------|-------|-------|-------|-------|-------|-------|-------|-------|-------|-------|-------|-------|-------|-------|-------|-------|-------|-------|-------|-------|-------|-------|-------|-------|-------|-------|-------|-------|-------|-------|-------|-------|-------|-------|-------|-------|-------|-------|-------|-------|-------|-------|-------|-------|-------|-------|-------|-------|-------|-------|-------|------|------|------|------|------|------|------|------|------|------|------|------|------|------|------|------|------|------|------|------|------|------|------|------|-------|-------|-------|-------|-------|-------|-------|-------|-------|-------|-------|-------|-------|-------|-------|-------|-------|-------|-------|-------|-------|-------|-------|-------|-------|-------|-------|-------|-------|-------|-------|-------|-------|-------|-------|-------|-------|-------|-------|-------|-------|-------|-------|-------|-------|-------|-------|-------|-------|-------|-------|-------|------|------|------|------|------|------|------|------|------|------|------|------|------|------|------|------|------|------|------|------|------|------|------|------|-------|-------|-------|-------|-------|-------|-------|-------|-------|-------|-------|-------|-------|-------|-------|-------|-------|-------|-------|-------|-------|-------|-------|-------|-------|-------|-------|-------|-------|-------|-------|-------|-------|-------|-------|-------|-------|-------|-------|-------|-------|-------|-------|-------|-------|-------|-------|-------|-------|-------|-------|-------|------|------|------|------|------|------|------|------|------|------|------|------|------|------|------|------|------|------|------|------|------|------|------|------|-------|-------|-------|-------|-------|-------|-------|-------|-------|-------|-------|-------|-------|-------|-------|-------|-------|-------|-------|-------|-------|-------|-------|-------|-------|-------|-------|-------|-------|-------|-------|-------|-------|-------|-------|-------|-------|-------|-------|-------|-------|-------|-------|-------|-------|-------|-------|-------|-------|-------|-------|-------|------|------|------|------|------|------|------|------|------|------|------|------|------|------|------|------|------|------|------|------|------|------|------|------|-------|-------|-------|-------|-------|-------|-------|-------|-------|-------|-------|-------|-------|-------|-------|-------|-------|-------|-------|-------|-------|-------|-------|-------|-------|-------|-------|-------|-------|-------|-------|-------|-------|-------|-------|-------|-------|-------|-------|-------|-------|-------|-------|-------|-------|-------|-------|-------|-------|-------|-------|-------|------|------|------|------|------|------|------|------|------|------|------|------|------|------|------|------|------|------|------|------|------|------|------|------|-------|-------|-------|-------|-------|-------|-------|-------|-------|-------|-------|-------|-------|-------|-------|-------|-------|-------|-------|-------|-------|-------|-------|-------|-------|-------|-------|-------|-------|-------|-------|-------|-------|-------|-------|-------|-------|-------|-------|-------|-------|-------|-------|-------|-------|-------|-------|-------|-------|-------|-------|-------|------|------|------|------|------|------|------|------|------|------|------|------|------|------|------|------|------|------|------|------|------|------|------|------|-------|-------|-------|-------|-------|-------|-------|-------|-------|-------|-------|-------|-------|-------|-------|-------|-------|-------|-------|-------|-------|-------|-------|-------|-------|-------|-------|-------|-------|-------|-------|-------|-------|-------|-------|-------|-------|-------|-------|-------|-------|-------|-------|-------|-------|-------|-------|-------|-------|-------|-------|-------|------|------|------|------|------|------|------|------|------|------|------|------|------|------|------|------|------|------|------|------|------|------|------|------|-------|-------|-------|-------|-------|-------|-------|-------|-------|-------|-------|-------|-------|-------|-------|-------|-------|-------|-------|-------|-------|-------|-------|-------|-------|-------|-------|-------|-------|-------|-------|-------|-------|-------|-------|-------|-------|-------|-------|-------|-------|-------|-------|-------|-------|-------|-------|-------|-------|-------|-------|-------|------|------|------|------|------|------|------|------|------|------|------|------|------|------|------|------|------|------|------|------|------|------|------|------|-------|-------|-------|-------|-------|-------|-------|-------|-------|-------|-------|-------|-------|-------|-------|-------|-------|-------|-------|-------|-------|-------|-------|-------|-------|-------|-------|-------|-------|-------|-------|-------|-------|-------|-------|-------|-------|-------|-------|-------|-------|-------|-------|-------|-------|-------|-------|-------|-------|-------|-------|-------|------|------|------|------|------|------|------|------|------|------|------|------|------|------|------|------|------|------|------|------|------|------|------|------|-------|-------|-------|-------|-------|-------|-------|-------|-------|-------|-------|-------|-------|-------|-------|-------|-------|-------|-------|-------|-------|-------|-------|-------|-------|-------|-------|-------|-------|-------|-------|-------|-------|-------|-------|-------|-------|-------|-------|-------|-------|-------|-------|-------|-------|-------|-------|-------|-------|-------|-------|-------|------|------|------|------|------|------|------|------|------|------|------|------|------|------|------|------|------|------|------|------|------|------|------|------|-------|-------|-------|-------|-------|-------|-------|-------|-------|-------|-------|-------|-------|-------|-------|-------|-------|-------|-------|-------|-------|-------|-------|-------|-------|-------|-------|-------|-------|-------|-------|-------|-------|-------|-------|-------|-------|-------|-------|-------|-------|-------|-------|-------|-------|-------|-------|-------|-------|-------|-------|-------|------|------|------|------|------|------|------|------|------|------|------|------|------|------|------|------|------|------|------|------|------|------|------|------|-------|-------|-------|-------|-------|-------|-------|-------|-------|-------|-------|-------|-------|-------|-------|-------|-------|-------|-------|-------|-------|-------|-------|-------|-------|-------|-------|-------|-------|-------|-------|-------|-------|-------|-------|-------|-------|-------|-------|-------|-------|-------|-------|-------|-------|-------|-------|-------|-------|-------|-------|-------|------|------|------|------|------|------|------|------|------|------|------|------|------|------|------|------|------|------|------|------|------|------|------|------|-------|-------|-------|-------|-------|-------|-------|-------|-------|-------|-------|-------|-------|-------|-------|-------|-------|-------|-------|-------|-------|-------|-------|-------|-------|-------|-------|-------|-------|-------|-------|-------|-------|-------|-------|-------|-------|-------|-------|-------|-------|-------|-------|-------|-------|-------|-------|-------|-------|-------|-------|-------|------|------|------|------|------|------|------|------|------|------|------|------|------|------|------|------|------|------|------|------|------|------|------|------|-------|-------|-------|-------|-------|-------|-------|-------|-------|-------|-------|-------|-------|-------|-------|-------|-------|-------|-------|-------|-------|-------|-------|-------|-------|-------|-------|-------|-------|-------|-------|-------|-------|-------|-------|-------|-------|-------|-------|-------|-------|-------|-------|-------|-------|-------|-------|-------|-------|-------|-------|-------|------|------|------|------|------|------|------|------|------|------|------|------|------|------|------|------|------|------|------|------|------|------|------|------|-------|-------|-------|-------|-------|-------|-------|-------|-------|-------|-------|-------|-------|-------|-------|-------|-------|-------|-------|-------|-------|-------|-------|-------|-------|-------|-------|-------|-------|-------|-------|-------|-------|-------|-------|-------|-------|-------|-------|-------|-------|-------|-------|-------|-------|-------|-------|-------|-------|-------|-------|-------|------|------|------|------|------|------|------|------|------|------|------|------|------|------|------|------|------|------|------|------|------|------|------|------|-------|-------|-------|-------|-------|-------|-------|-------|-------|-------|-------|-------|-------|-------|-------|-------|-------|-------|-------|-------|-------|-------|-------|-------|-------|-------|-------|-------|-------|-------|-------|-------|-------|-------|-------|-------|-------|-------|-------|-------|-------|-------|-------|-------|-------|-------|-------|-------|-------|-------|-------|-------|------|------|------|------|------|------|------|------|------|------|------|------|------|------|------|------|------|------|------|------|------|------|------|------|-------|-------|-------|-------|-------|-------|-------|-------|-------|-------|-------|-------|-------|-------|-------|-------|-------|-------|-------|-------|-------|-------|-------|-------|-------|-------|-------|-------|-------|-------|-------|-------|-------|-------|-------|-------|-------|-------|-------|-------|-------|-------|-------|-------|-------|-------|-------|-------|-------|-------|-------|-------|------|------|------|------|------|------|------|------|------|------|------|------|------|------|------|------|------|------|------|------|------|------|------|------|-------|-------|-------|-------|-------|-------|-------|-------|-------|-------|-------|-------|-------|-------|-------|-------|-------|-------|-------|-------|-------|-------|-------|-------|-------|-------|-------|-------|-------|-------|-------|-------|-------|-------|-------|-------|-------|-------|-------|-------|-------|-------|-------|-------|-------|-------|-------|-------|-------|-------|-------|-------|------|------|------|------|------|------|------|------|------|------|------|------|------|------|------|------|------|------|------|------|------|------|------|------|-------|-------|-------|-------|-------|-------|-------|-------|-------|-------|-------|-------|-------|-------|-------|-------|-------|-------|-------|-------|-------|-------|-------|-------|-------|-------|-------|-------|-------|-------|-------|-------|-------|-------|-------|-------|-------|-------|-------|-------|-------|-------|-------|-------|-------|-------|-------|-------|-------|-------|-------|-------|------|------|------|------|------|------|------|------|------|------|------|------|------|------|------|------|------|------|------|------|------|------|------|------|-------|-------|-------|-------|-------|-------|-------|-------|-------|-------|-------|-------|-------|-------|-------|-------|-------|-------|-------|-------|-------|-------|-------|-------|-------|-------|-------|-------|-------|-------|-------|-------|-------|-------|-------|-------|-------|-------|-------|-------|-------|-------|-------|-------|-------|-------|-------|-------|-------|-------|-------|-------|------|------|------|------|------|------|------|------|------|------|------|------|------|------|--|





[illegible]

ASH Average Nucleotide Identity (ANI)



**Table S22.** Major operational taxonomic units (OTUs) of bacterial and archaeal genera found in seawater (SW), oil contaminated seawater (SWO), and biostimulated oil contaminated seawater (SWOB) after four and eight months of incubation according to amplicon-based sequencing. Multiple hits within the same genera are indicated in brackets after the genera name.

| Treat-ment type | Phylum         | Class                    | Order                 | Family                       | Genus                             | 4 months | 8 months |
|-----------------|----------------|--------------------------|-----------------------|------------------------------|-----------------------------------|----------|----------|
| SW              | Bacteroidetes  | Bacteroidia              | Flavobacteriales      | Crocinitomicaceae            | Unclassified Crocinitomicaceae    | +        | -        |
|                 |                |                          |                       | Flavobacteriaceae            | Doktonia                          | +        | +        |
|                 |                |                          |                       |                              | Ulvibacter                        | +        | -        |
|                 |                |                          |                       |                              | Unclassified Flavobacteriaceae    | +        | +        |
|                 |                |                          |                       | NS9 marine group             | NS9 marine group genus            | +        | -        |
|                 |                |                          | Sphingobacteriales    | NS11-12 marine group         | NS11-12 marine group genus        | +        | +        |
|                 | Firmicutes     | Clostridia               | Clostridiales         | Clostridiaceae               | Clostridium (sensu stricto)       | +        | -        |
|                 | Planctomycetes | OM190                    |                       |                              | OM190 genus                       | +        | +        |
|                 |                | Phycisphaerae            | Phycisphaerales       | Phycisphaeraceae             | SMIA02                            | +        | +        |
|                 | Proteobacteria | $\alpha$ -proteobacteria | Kordiimonadales       | Uncultured Kordiimonadales   |                                   | +        | -        |
|                 |                |                          | Rhizobiales           | Rhizobiaceae                 | Lentilitoribacter                 | +        | +        |
|                 |                |                          | Rhodobacterales       | Rhodobacteraceae             | Planktomarina                     | +        | -        |
|                 |                |                          |                       |                              | Pseudophaeobacter                 | +        | +        |
|                 |                |                          |                       |                              | Unclassified Rhodobacteraceae (2) | +        | +        |
|                 |                |                          |                       |                              | Sedimentitaleae                   | +        | +        |
|                 |                |                          | Rhodospirillales      | Magnetospiraceae             | Uncultured Magnetospiraceae       | +        | +        |
|                 |                |                          | SAR11 clade           | Clade III                    | Clade III genus                   | +        | +        |
|                 |                | $\gamma$ -proteobacteria | Betaproteobacteriales | Methylophilaceae             | OM43_clade                        | +        | +        |
|                 |                |                          | Cellvibrionales       | Porticoccaceae               | Porticoccus                       | +        | +        |
|                 |                |                          |                       | Spongiibacteraceae           | Zhongshania                       | +        | +        |
|                 |                |                          |                       | Unclassified Cellvibrionales |                                   | +        | +        |
|                 |                | $\delta$ -proteobacteria | Bdellovibrionales     | Bdellovibrionaceae           | OM27_clade                        | +        | -        |
|                 |                |                          | Myxococcales          | Sandaracinaceae              | Uncultured Sandaracinaceae        | +        | -        |
| SWO             | Bacteroidetes  | Bacteroidia              | Flavobacteriales      | Flavobacteriaceae            | Cellulophaga                      | +        | -        |
|                 |                |                          |                       |                              | Maribacter (2)                    | +        | +        |

| Treat-ment type                    | Phylum                   | Class                    | Order              | Family                      | Genus                              | 4 months         | 8 months          |               |
|------------------------------------|--------------------------|--------------------------|--------------------|-----------------------------|------------------------------------|------------------|-------------------|---------------|
|                                    | Proteobacteria           | $\alpha$ -proteobacteria | Parvibaculales     | Parvibaculaceae             | Ulvibacter                         | +                | -                 |               |
|                                    |                          |                          |                    |                             | Unclassified Flavobacteriaceae (2) | +                | +                 |               |
|                                    |                          |                          |                    |                             | Parvibaculum                       | +                | +                 |               |
|                                    |                          |                          |                    |                             | Pacificibacter                     | +                | +                 |               |
|                                    |                          |                          |                    |                             | Pelagibius                         | -                | +                 |               |
|                                    |                          |                          |                    |                             | Colwellia                          | -                | +                 |               |
|                                    |                          |                          |                    |                             | Pseudohongiella                    | +                | +                 |               |
|                                    |                          |                          |                    |                             | Ca. Nitrosopumilus                 | +                | -                 |               |
| Thaumarchaeota                     | Nitrososphaeria          | Nitrosopumilales         | Nitrosopumiliaceae |                             |                                    |                  |                   |               |
| SWOB                               | Bacteroidetes            | Bacteroidia              | Flavobacteriales   | Flavobacteriaceae           | Aequorivita                        | +                | +                 |               |
|                                    | Proteobacteria           | $\alpha$ -proteobacteria | Rhodobacterales    | Rhodobacteriaceae           | Unclassified Rhodobacteraceae      | +                | +                 |               |
|                                    |                          |                          | Sphingomonadales   | Sphingomonadaceae           | Unclassified Sphingomonadaceae     | +                | +                 |               |
|                                    |                          |                          | Alteromonadales    | Alteromonadaceae            | Paraglaciecola                     | +                | +                 |               |
|                                    |                          | $\gamma$ -proteobacteria | Moraxellaceae      | Paraperlucidibaca           | +                                  | +                |                   |               |
|                                    |                          |                          |                    | Pseudomonadaceae            | Pseudomonas (2)                    | +                | +                 |               |
|                                    |                          |                          | SW & SWO           | Bacteroidetes               | Bacteroidia                        | Flavobacteriales | Flavobacteriaceae | Tenacibaculum |
|                                    | Ulvibacter (2)           | +                        |                    |                             |                                    |                  |                   | +             |
| Unclassified Flavobacteriaceae (2) | +                        | +                        |                    |                             |                                    |                  |                   |               |
| Planctomycetes                     | OM190                    |                          |                    | OM190 genus                 | +                                  | +                |                   |               |
| Proteobacteria                     | $\alpha$ -proteobacteria | Caulobacterales          |                    | Hyphomonadaceae             | Algimonas                          | +                | +                 |               |
|                                    |                          |                          |                    |                             | Hyphomonas                         | +                | +                 |               |
|                                    |                          |                          |                    |                             | Maricaulis                         | +                | +                 |               |
|                                    |                          | Rhodobacterales          |                    | Rhodobacteriaceae           | Unclassified Rhodobacteraceae (2)  | +                | -                 |               |
|                                    |                          | Rhodospirillales         |                    | Terasakiellaceae            | Uncultured Terasakiellaceae        | +                | +                 |               |
|                                    |                          | SAR11 clade              |                    | Clade I                     | Clade Ia genus                     | +                | -                 |               |
|                                    |                          | $\gamma$ -proteobacteria |                    | Alteromonadales             | Alteromonadaceae                   | Paraglaciecola   | +                 | +             |
|                                    | Colwelliaceae            |                          |                    |                             | Colwellia                          | +                | +                 |               |
|                                    |                          |                          |                    | Uncultured Colwelliaceae    | -                                  | +                |                   |               |
|                                    | Nitrosococcales          | Methylophagaceae         |                    | Uncultured Methylophagaceae | +                                  | +                |                   |               |
| S W &                              | Acidobacteria            | Subgroup 6               |                    |                             | Subgroup 6 genus (2)               | +                | +                 |               |
|                                    | Bacteroidetes            | Bacteroidia              | Flavobacteriales   | Flavobacteriaceae           | Flavobacterium                     | +                | +                 |               |

| Treat-ment type | Phylum         | Class                    | Order                                 | Family               | Genus                              | 4 months     | 8 months |
|-----------------|----------------|--------------------------|---------------------------------------|----------------------|------------------------------------|--------------|----------|
| SWO & SWOB      | Proteobacteria | $\alpha$ -proteobacteria | Unclassified $\alpha$ -proteobacteria |                      |                                    | -            | +        |
|                 |                | $\gamma$ -proteobacteria | Methylococcales                       | Cycloclasticaceae    | Cycloclasticus                     | +            | +        |
|                 | Proteobacteria | $\alpha$ -proteobacteria | Sneathiellales                        | Sneathiellaceae      | Sneathiella                        | +            | +        |
|                 |                | $\gamma$ -proteobacteria | Oceanospirillales                     | Marinomonadaceae     | Marinomonas                        | +            | +        |
|                 |                |                          |                                       | Nitrincolaceae       | Amphritea                          | +            | +(SWOB)  |
| SW & SWO & SWOB | Bacteroidetes  | Bacteroidia              | Flavobacteriales                      | Flavobacteriaceae    | Aequorivita                        | +(SWO. SWOB) | +        |
|                 |                |                          |                                       |                      | Aurantivirga                       | +            | +        |
|                 |                |                          |                                       |                      | Jejudonia                          | +(SWO)       | +        |
|                 |                |                          |                                       |                      | Ulvibacter                         | +            | +        |
|                 |                |                          |                                       |                      | Unclassified Flavobacteriaceae (3) | +            | +        |
|                 | Planctomycetes | Phycisphaerae            | Phycisphaerales                       | Phycisphaeraceae     | SM1A02                             | +(SW. SWO)   | +        |
|                 | Proteobacteria | $\alpha$ -proteobacteria | Rhizobiales                           | Rhizobiaceae         | Hoeflea                            | +(SW. SWO)   | +        |
|                 |                |                          | Rhodobacterales                       | Rhodobacteraceae     | Pacificibacter                     | +            | +        |
|                 |                |                          |                                       |                      | Unclassified Rhodobacteraceae      | +            | +        |
|                 |                |                          | Sneathiellales                        | Sneathiellaceae      | Sneathiella                        | +            | +        |
|                 |                |                          | Sphingomonadales                      | Sphingomonadaceae    | Sphingorhabdus                     | +            | +        |
|                 |                | $\gamma$ -proteobacteria | Alteromonadales                       | Colwelliaceae        | Colwellia (2)                      | +            | +        |
|                 |                |                          | Enterobacteriales                     | Enterobacteraceae    | Unclassified Enterobacteraceae     | -            | +        |
|                 |                |                          | Methylococcales                       | Cycloclasticaceae    | Cycloclasticus                     | +            | +        |
|                 |                |                          | Oceanospirillales                     | Marinomonadaceae     | Marinomonas                        | +            | +        |
|                 |                |                          |                                       | Nitrincolaceae       | Uncultured Nitrincolaceae          | +            | +        |
|                 |                |                          |                                       | Saccharospirillaceae | Oleispira                          | +            | -        |
|                 |                |                          | Pseudomonadales                       | Moraxellaceae        | Paraperlucidibaca                  | +(SW. SWOB)  | +        |
|                 |                |                          | Unclassified Gammaproteobacteria      |                      |                                    | +            | +        |

## Supplementary figures

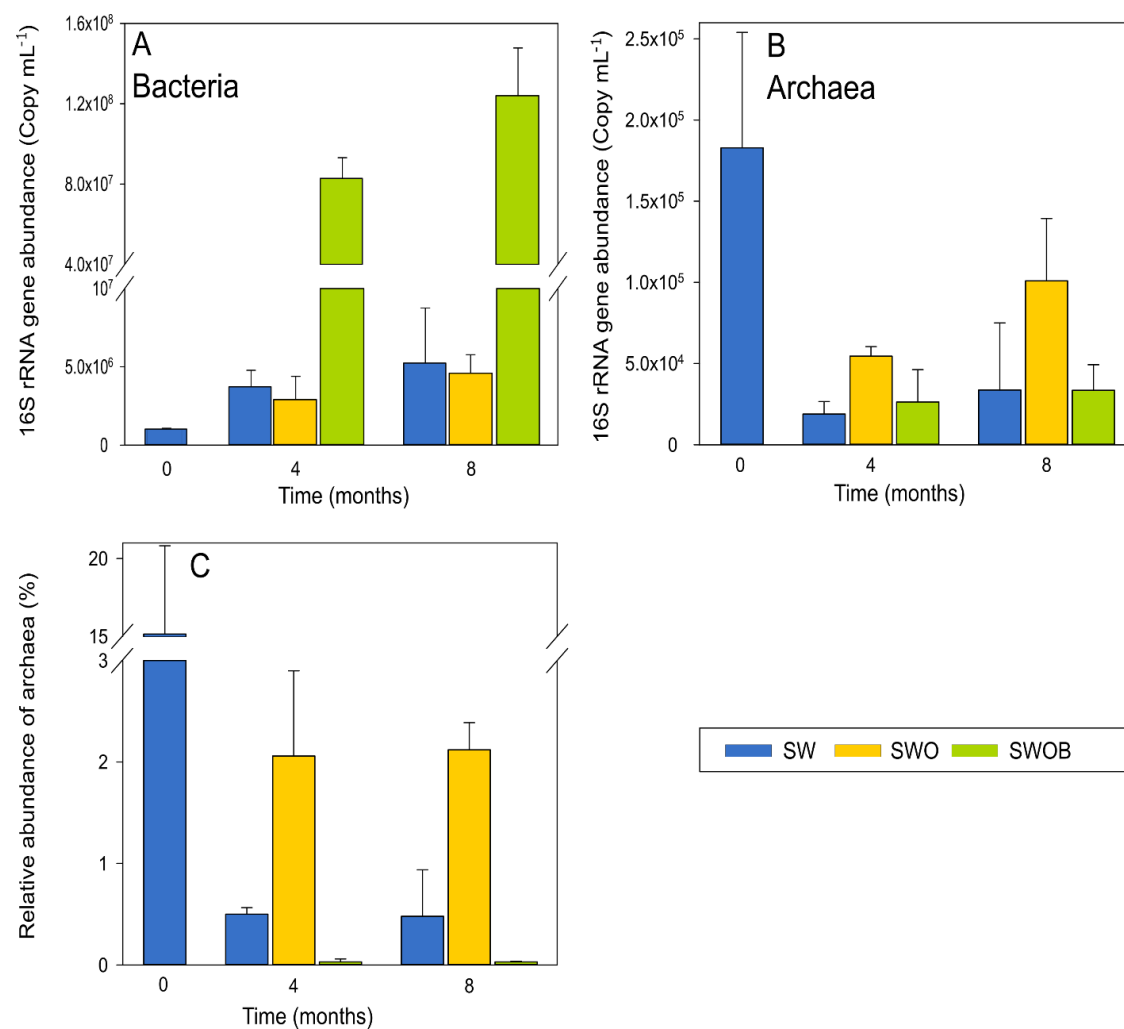

**Fig. S1.** The abundances of bacterial (A) and archaeal (B) communities, as well as the relative abundance of the archaeal community (C) in seawater (SW), oil contaminated seawater (SWO) and biostimulated oil contaminated seawater (SWOB),  $n = 2$ .

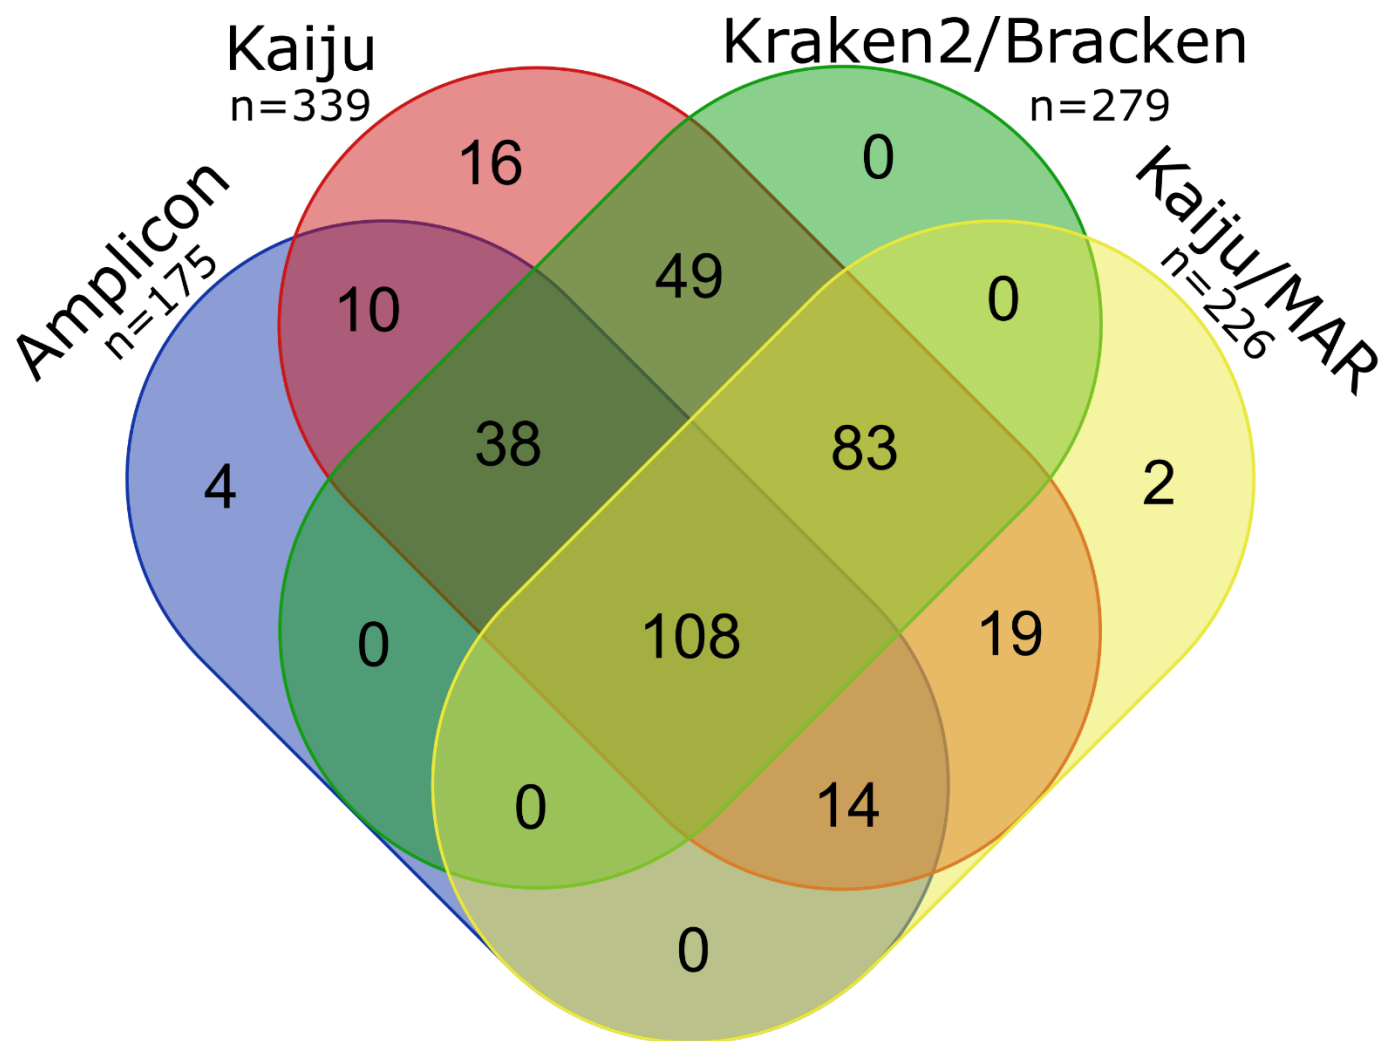

**Fig. S2.** Venn diagram showing the overlap of detected genera containing oil hydrocarbon degraders between different taxonomic classification methods (Kaiju with the NCBI-nr database, Kaiju with the MAR<sub>DB</sub> database, Kraken2 with the Standard Kraken 2 database, Bracken with the Standard Kraken 2 database, and amplicon-based sequencing with the SILVA database).

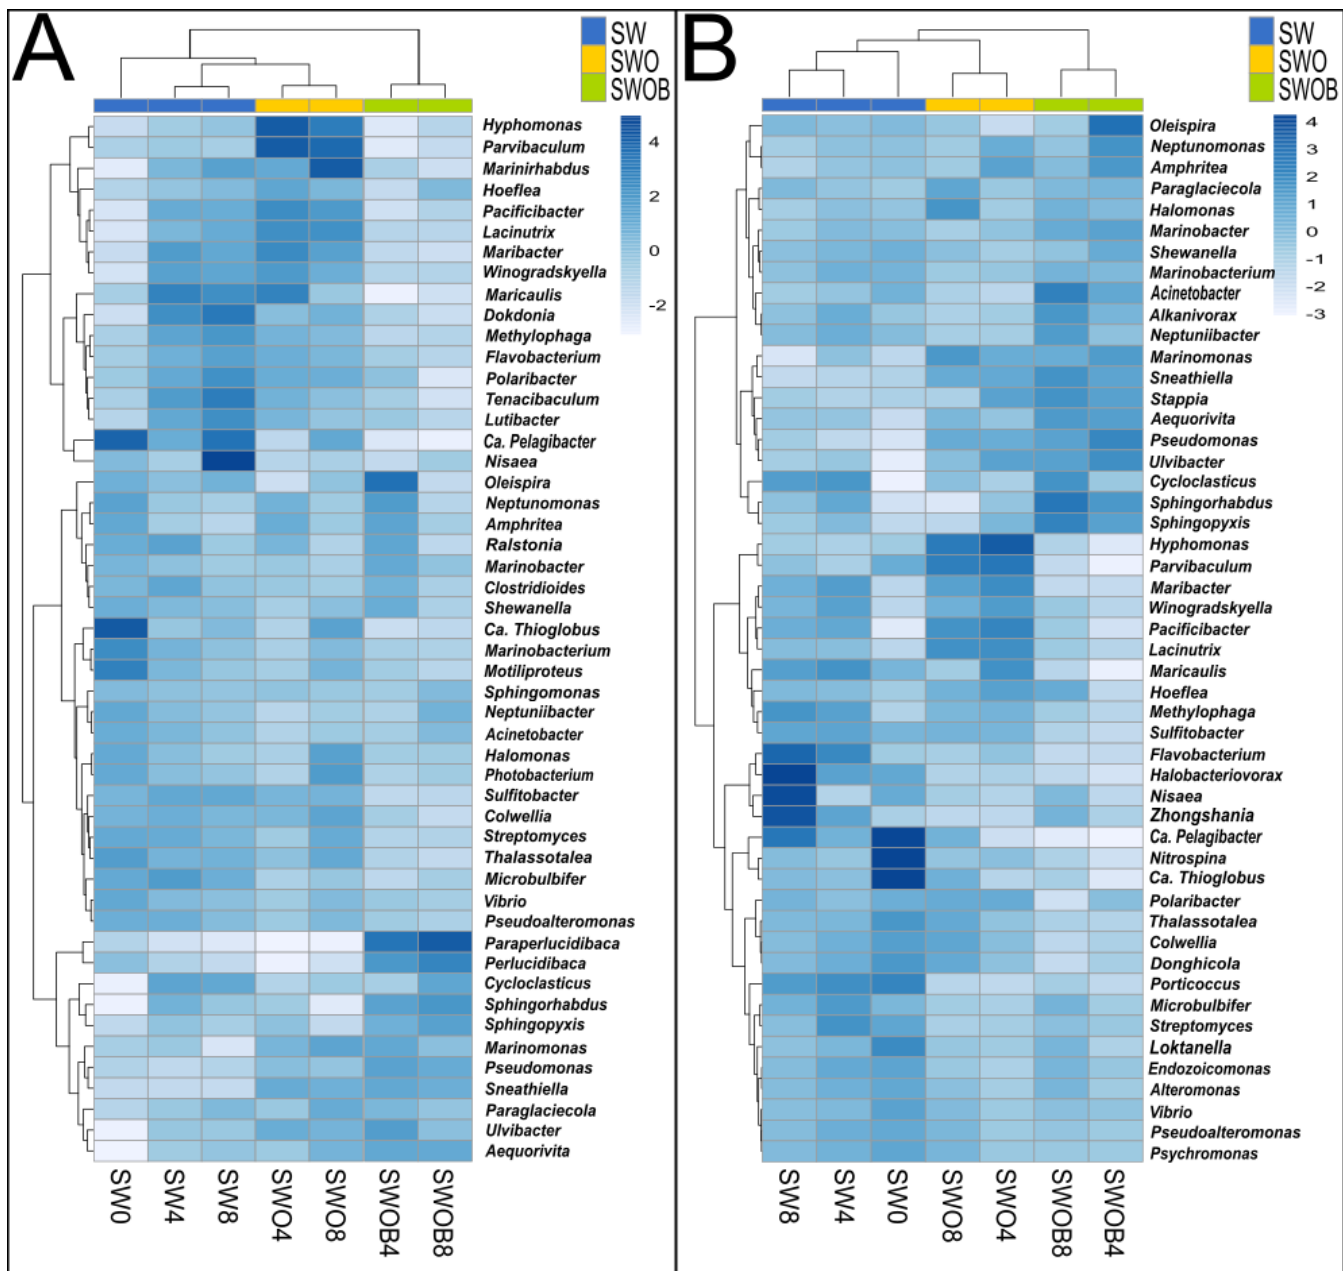

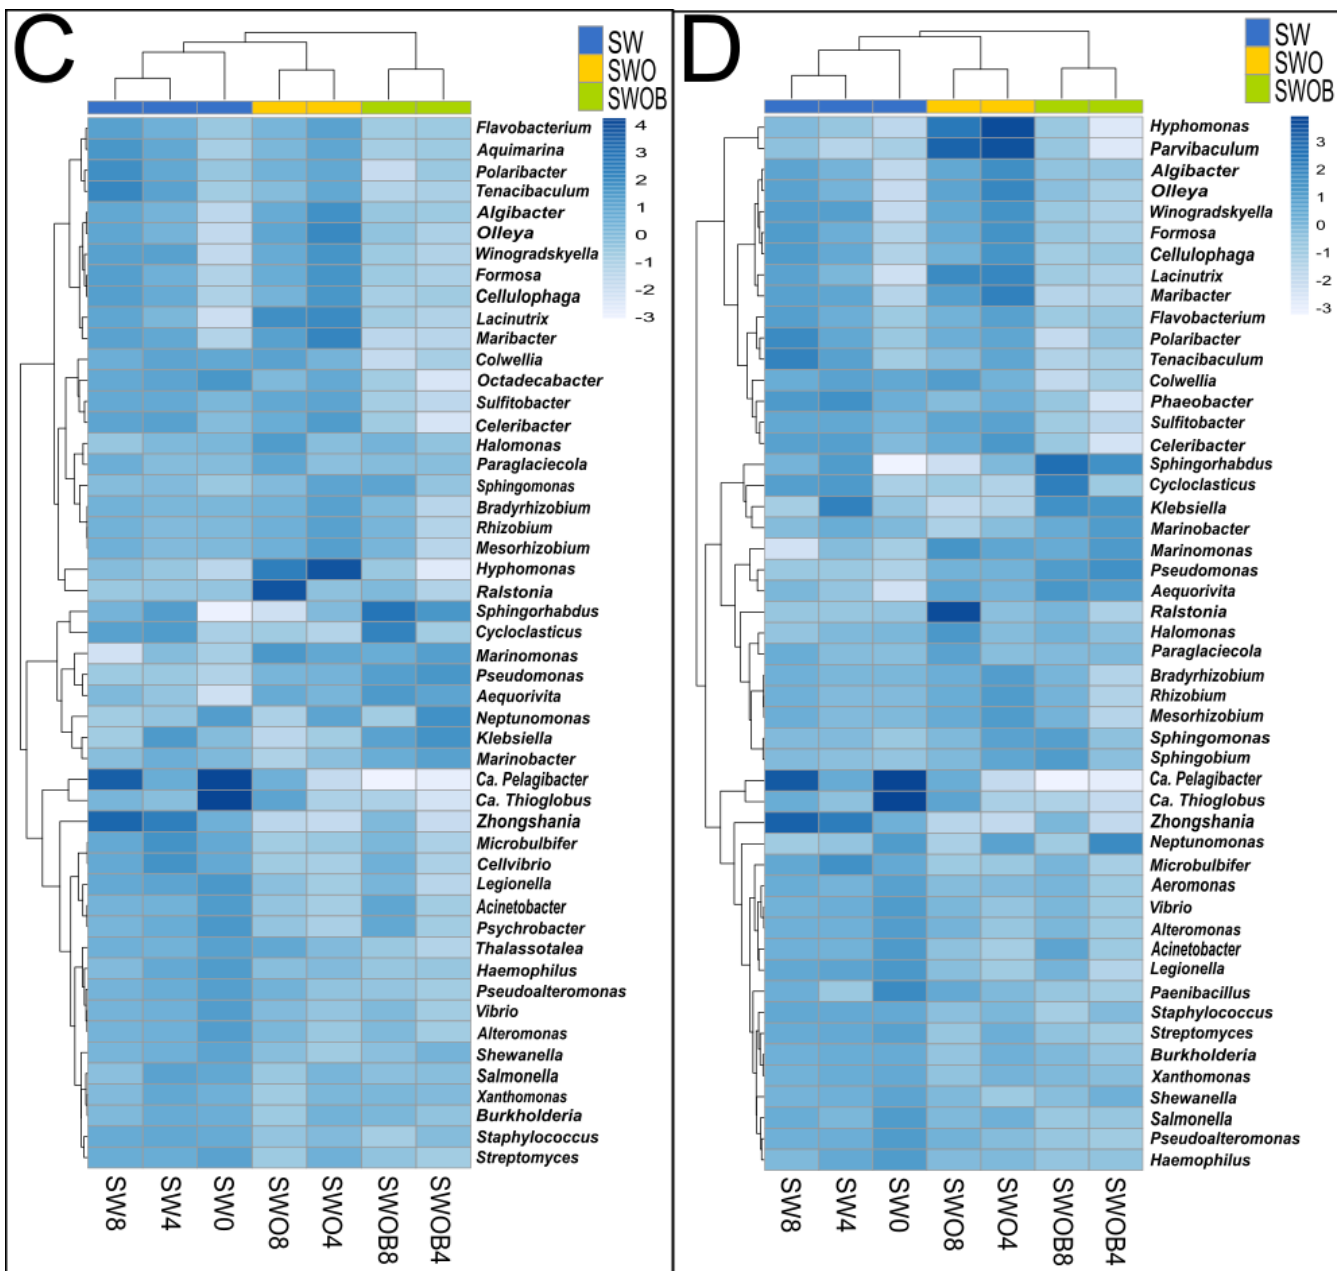

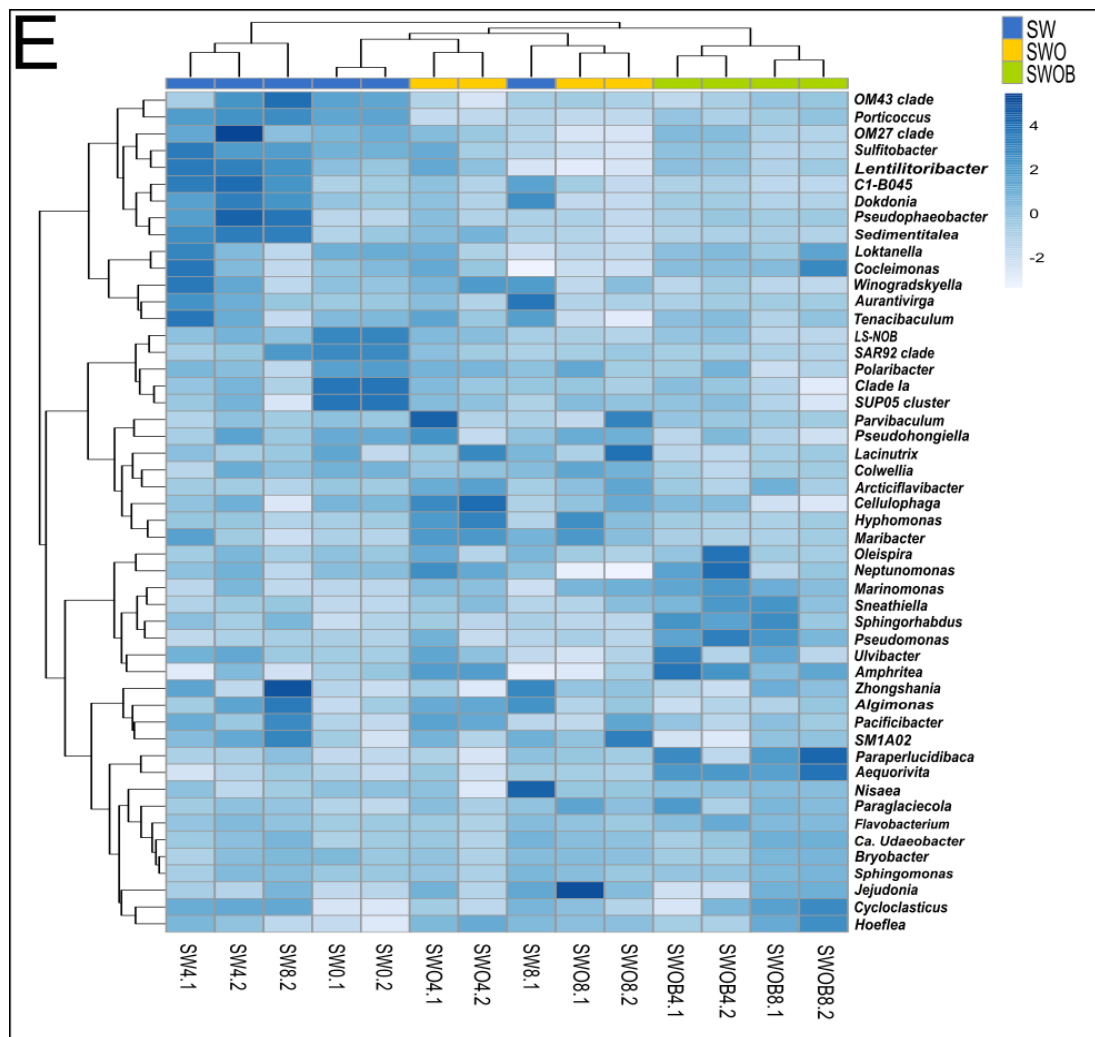

**Fig. S3.** The clustering of seawater (SW), oil contaminated seawater (SWO) and biostimulated oil contaminated seawater (SWOB) microcosms based on the crl-transformed proportions of the 50 predominant genera of Kaiju (A), Kaiju/MAR (B), Kraken2 (C), Bracken (D), and Amplicon (E) taxonomic classifications. The numbers in sample codes denote time in months, second number in sample code on subplot E denotes the treatment parallel number. The color intensity corresponds to crl-transformed proportion values with dark blue denoting genera with high proportion values in bacterial community.



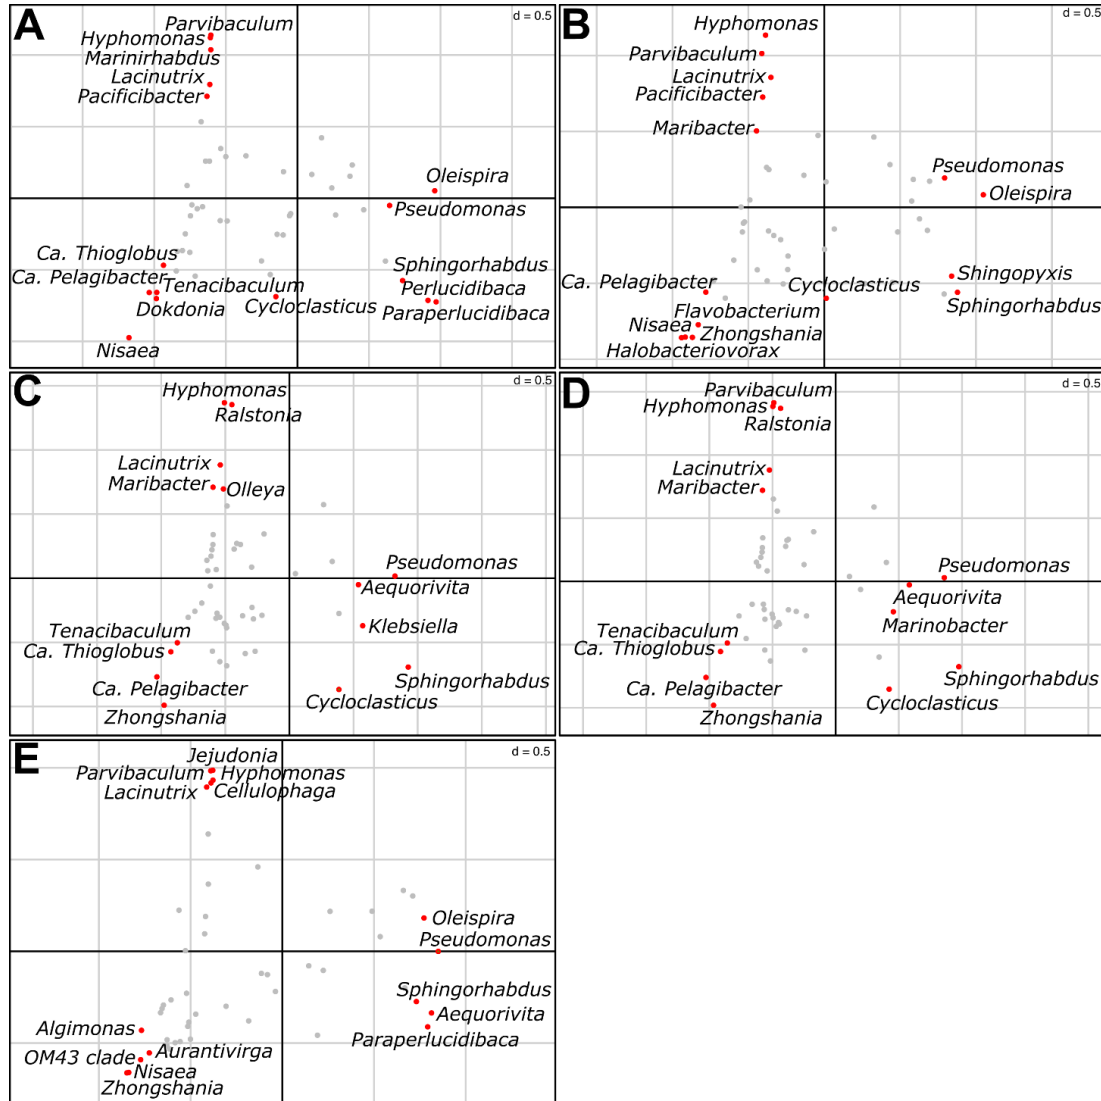

**Fig. S4.** Multiple co-inertia analysis results based on datasets of the top 50 bacterial genera proportions based on five taxonomic classification methods. Shown are variable spaces for each dataset (Kaiju with the NCBI-nr database (A), Kaiju with the MAR<sub>DB</sub> database (B), Kraken2 (C) and Bracken (D) with the Standard Kraken2 database, and Amplicon based sequencing with the SILVA database (E)).

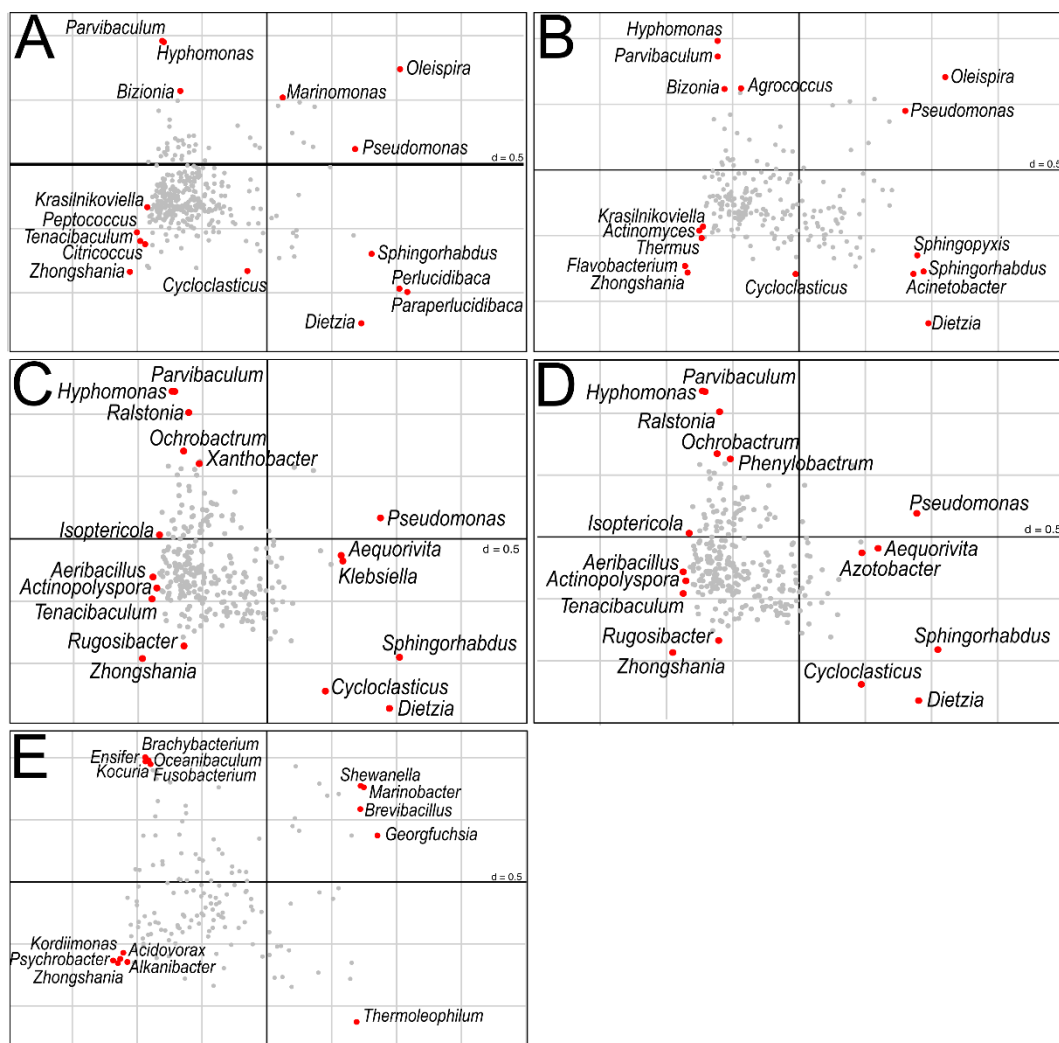

**Fig. S5.** Multiple co-inertia analysis results based on datasets of proportions of bacterial genera containing oil hydrocarbon degraders based on five taxonomic classification methods. Shown are variable spaces for each data set (Kaiju with the NCBI-nr database (A), Kaiju with the MAR<sub>DB</sub> database (B), Kraken2 (C) and Bracken (D) with the Standard Kraken2 database, and Amplicon based sequencing with the SILVA database (E)).

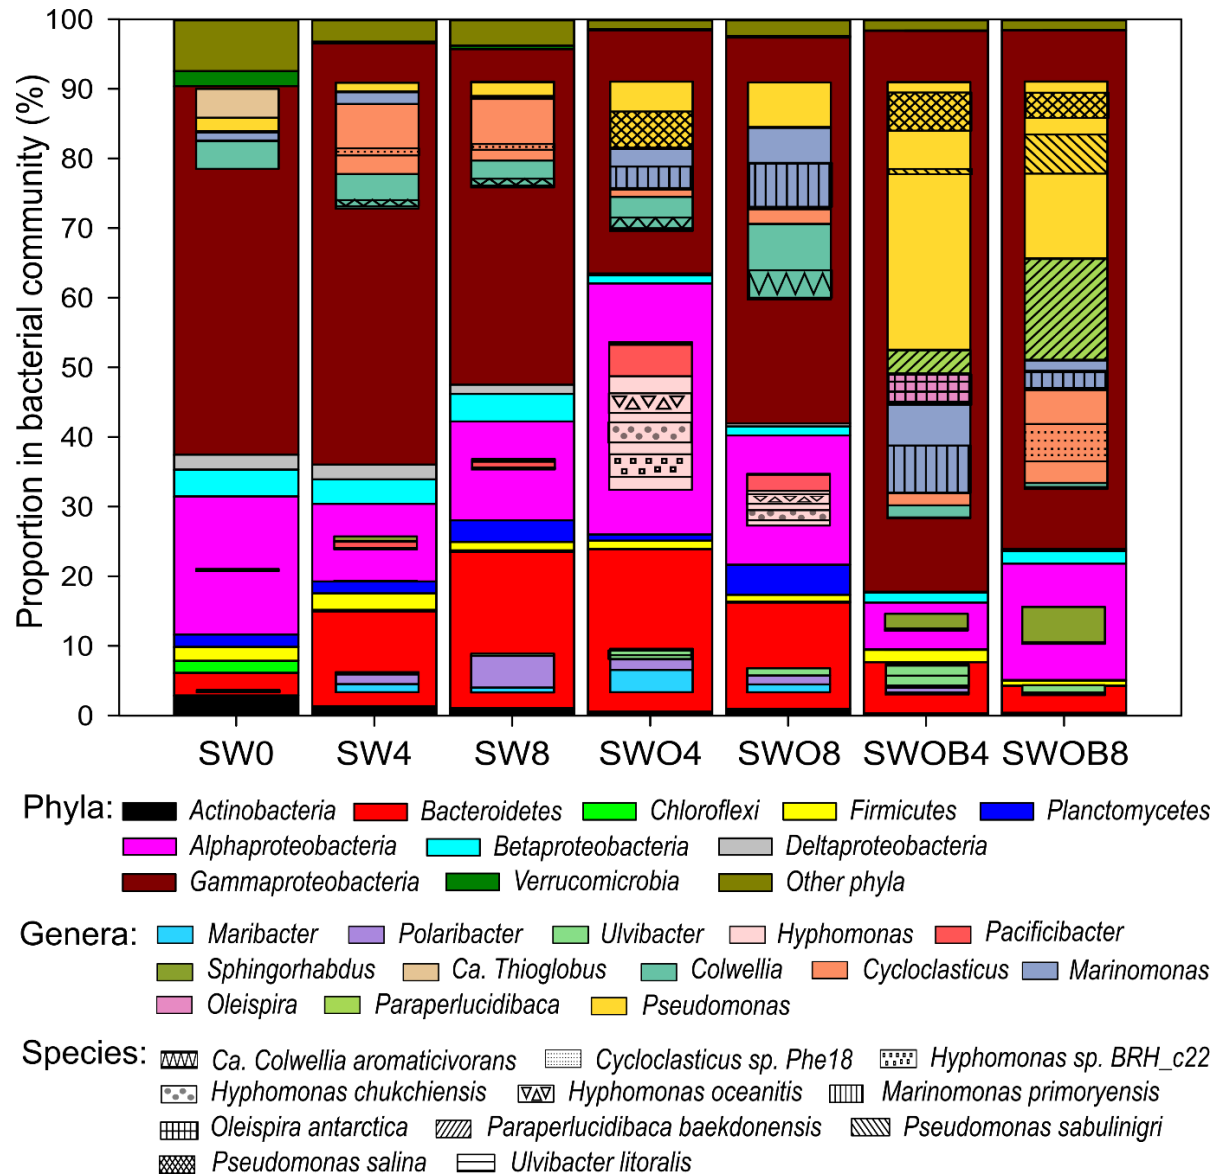

**Fig. S6.** The bacterial community structure at phylum, genus (>3%), and species (>3%) level in seawater (SW), oil-contaminated seawater (SWO), and biostimulated oil-contaminated seawater (SWOB). The numbers in sample codes denote time in months. Proteobacteria are presented at class level.

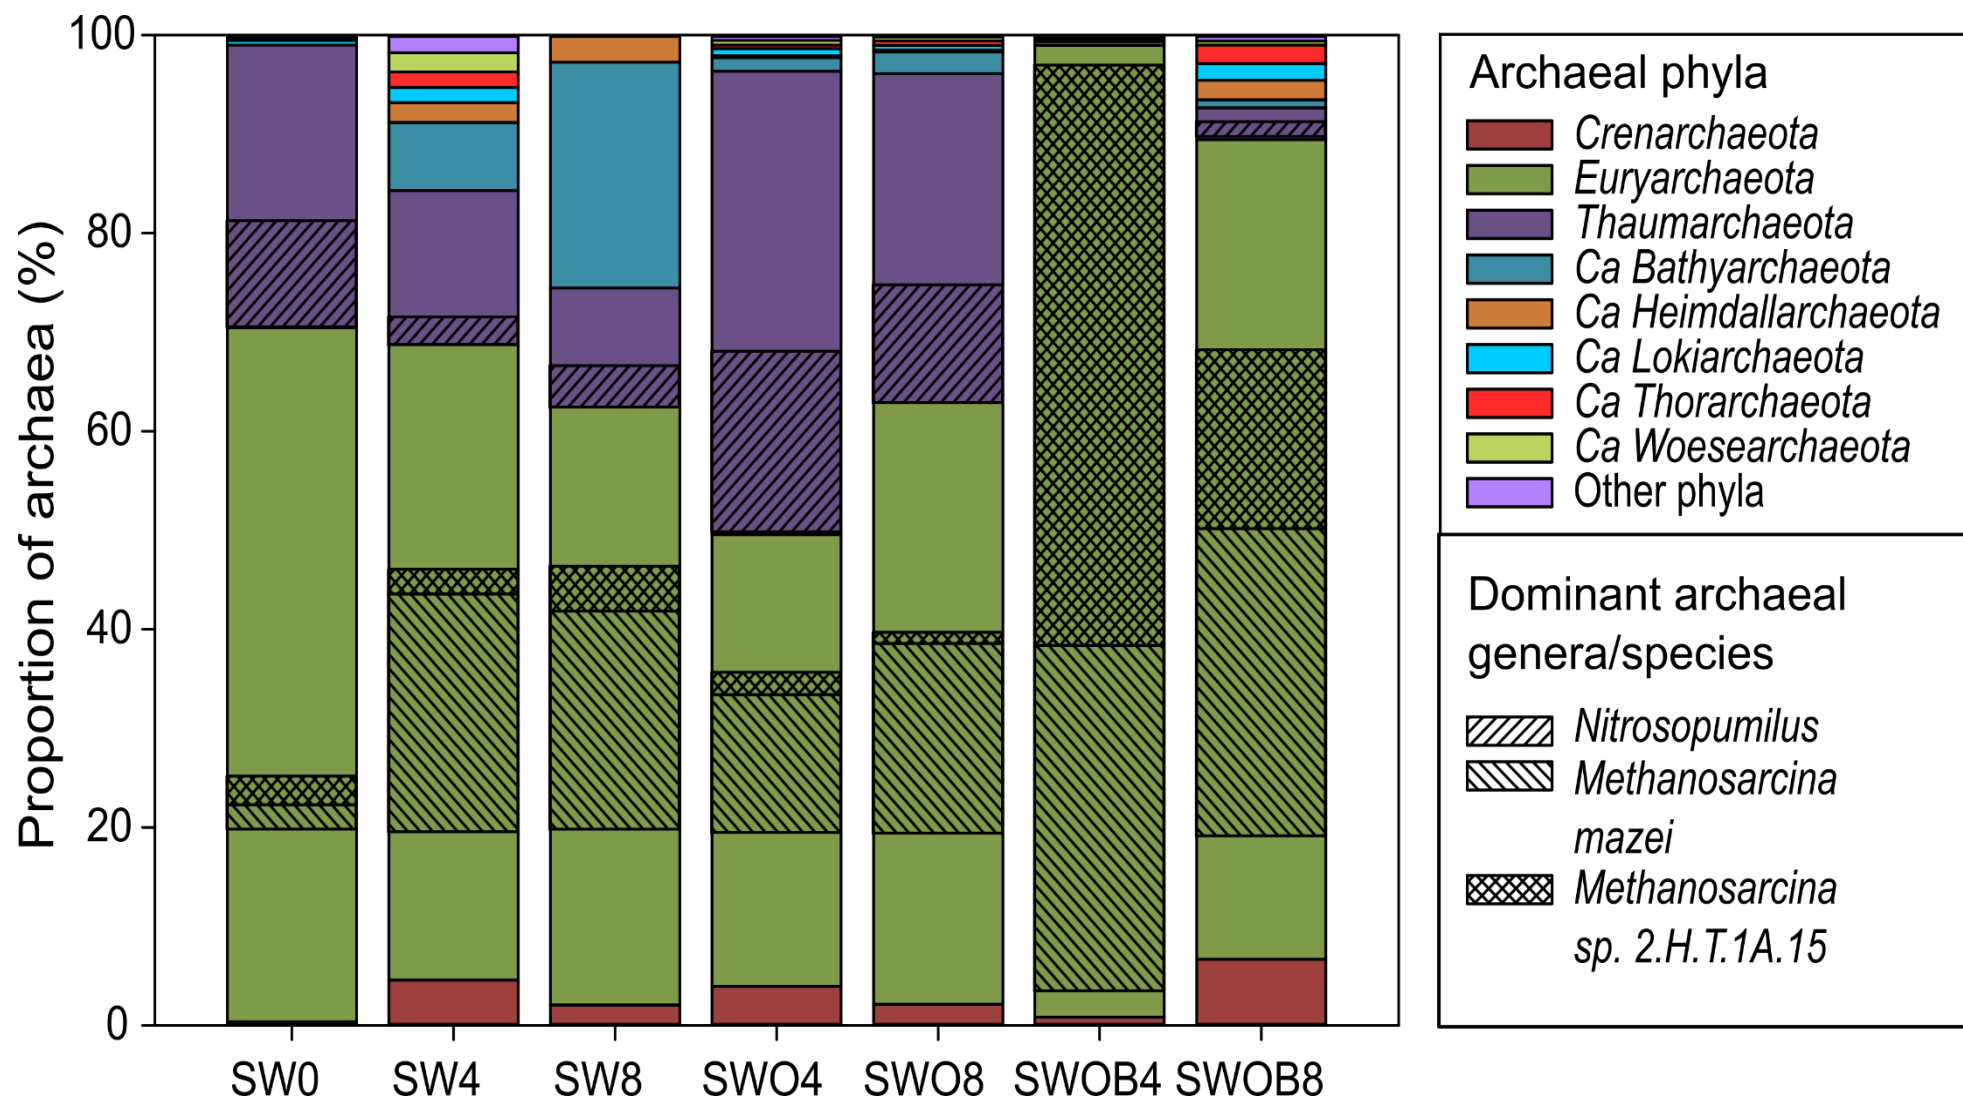

**Fig. S7.** The proportions of archaeal phyla as well as the most dominant archaeal genera and species in the archaeal community in seawater (SW), oil contaminated seawater (SWO) and biostimulated oil contaminated seawater (SWOB) according to taxonomic classification using Kaiju with the NCBI-nr database. The numbers in sample codes denote time in months.

## Section S1: Prokaryotic Community Structure in Different Treatments According to Kaiju

Since Kaiju with the NCBI-nr database generally resulted in the highest number of classified reads (Table S3), the closest rank estimate to the average of all methods on the phylum level (Figure 3), and the highest overlap with other methods when considering the list of 50 most abundant bacterial genera (Figure 4), the prokaryotic community structure in different treatments of the current study is described according to this method.

At the phylum level, the bacterial community in the initial seawater (SW0), used to set up the treatment microcosms, was dominated by Proteobacteria (especially Gamma- and Alphaproteobacteria), which accounted for 79% of the community (Figure S6). Gammaproteobacterial genera *Ca. Thioglobus* and *Colwellia* (4.1% and 4.0%, respectively) were the predominant genera in SW0. In SW, the Bacteroidetes proportion increased over time, from 3.2% in SW0 to 22.5% of the bacterial community in SW8; this increase was mostly at the expense of Alphaproteobacteria in the first half of the experiment and also Gammaproteobacteria during the second half. In this treatment, the proportion of *Colwellia* was quite stable (3.9–4.9%) throughout the experiment, while *Cycloclasticus* became the most predominant genus (8.8–10%) from the fourth month onward.

The addition of Troll B type crude oil markedly changed the seawater bacterial community structure. By the fourth month, the proportions of Gamma-, Beta-, and Deltaproteobacteria, as well as those of less abundant phyla Actinobacteria, Planctomycetes, Chloroflexi, and Verrucomicrobia, were markedly diminished. In SWO4, the proportion of Alphaproteobacteria was almost doubled, and the proportion of Bacteroidetes increased 7-fold compared to SW0. The Alphaproteobacterial genus *Hyphomonas* dominated in SWO4 (16.3%), with four predominant species (Table S18), followed by Gammaproteobacterial genera *Pseudomonas* (especially the species *P. salina*) and *Marinomonas* (9.6% and 5.8%, respectively). At the phylum level, the bacterial community structure in SWO8 became quite similar to that in SW8, but differences were evident at the genus level. In SWO8, *Marinomonas* (especially *M. primoryensis*) and *Colwellia* (especially *Ca. C. aromaticivorans*) replaced *Hyphomonas* in the dominant position (11.7%, 10.9%, and 5.0% of the bacterial community, respectively).

In the SWOB treatment, the proportion of Gammaproteobacteria was increased at the expense of all other phyla (except Bacteroidetes) and Proteobacterial classes compared to SW0. Gammaproteobacteria formed 75–81% of the bacterial community throughout the experiment. *Pseudomonas* strongly dominated in SWOB4 (38%), followed by *Marinomonas*, especially *M. primoryensis* (6.8%), and *Oleispira*, especially *O. antarctica* (4.4%) (Table S18). The proportion of the second most abundant taxon, Alphaproteobacteria, rose from 6.8% in SWOB4 to 17% in SWOB8, largely owing to the increase in the genus *Sphingorhabdus* (5.1%). Although still dominant, the proportions of *Pseudomonas* and *Marinomonas* (25.4% and 4.3%, respectively) decreased over time, and *Paraperlucidibaca* (especially *P. baekdonensis* (14.6%)) and *Cycloclasticus* (13.4%) emerged among community dominants in SWOB8.

Roughly 2/3 of the archaeal community in SW0 was formed by Euryarchaeota, while Thaumarchaeota accounted for 1/3 (Figure S7). In SW, the proportion of Thaumarchaeota decreased over time, and *Ca. Lokiarchaeota* emerged as the second most dominant phylum by the eighth month. In SWO, the proportion of Thaumarchaeota and especially its genus *Nitrosopumilus* initially increased at the expense of Euryarchaeota, while the community structure at the phylum level reverted to that in initial seawater (SW0) by the eighth month. In the SWOB treatment, on the other hand, two Euryarchaeotal *Methanosarcina* species (*M. mazei* and *M. sp. 2HT1A15*) became highly dominant, forming 90% and 45% of the archaeal community in SWOB4 and SWOB8, respectively.

## References

1. Liu, Z.; Lozupone, C.; Hamady, M.; Bushman, F.D.; Knight, R. Short pyrosequencing reads suffice for accurate microbial community analysis. *Nucleic Acids Res.* **2007**, *35*(18), e120, doi:10.1093/nar/gkm541.
2. Dethlefsen, L.; Huse, S.; Sogin, M.L.; Relman, D.A. The pervasive effects of an antibiotic on the human gut microbiota. as revealed by deep 16S rRNA sequencing. *PloS biol.* **2008**, *6*(11), 2383–2400, doi:10.1371/journal.pbio.0060280.
3. Espenberg, M.; Truu, M.; Truu, J.; Maddison, M.; Nõlvak, H.; Järveoja, J.; Mander, Ü. Impact of reed canary grass cultivation and mineral fertilisation on the microbial abundance and genetic potential for methane production in residual peat of an abandoned peat extraction area. *Plos ONE* **2016**, *11*(9), e0163864, doi:10.1371/journal.pone.0163864.
4. Krolicka, A.; Boccadoro, C.; Maeland, M.; Preston, C.M.; Birch, J.; Scholin, C.; Baussant, T. Detection of oil leaks by quantifying hydrocarbonoclastic bacteria in cold marine environments using the environmental sample processor. In *Proceedings of the 37th AMOP Technical Seminar on Environmental Contamination and Response*, Environment Canada, **2014**, pp. 791–807.
5. Gutierrez, T.; Biddle, J.F.; Teske, A.; Aitken, M.D. Cultivation dependent and cultivation independent characterization of hydrocarbon-degrading bacteria in Guaymas Basin sediments. *Front. Microbiol.* **2015**, *6*, 695, doi:10.3389/fmicb.2015.00695.
6. Widmer, F., Seidler, R.J., Gillevet, P.M., Watrud, L.S., Di Giovanni, G.D. (1998). A highly selective PCR protocol for detecting 16S rRNA genes of the genus *Pseudomonas* (sensu stricto) in environmental samples. *Appl. Environ. Microbiol.* **1998**, *64*(7), 2545-2553, doi:10.1128/aem.64.7.2545-2553.1998.
