# Supplementary material for: Microbial Community Dynamics during Biodegradation of Crude Oil and Its Response to Biostimulation in Svalbard Seawater at Low Temperature
Source: MDPI journal article supplement (doi:10.3390/microorganisms9122425), 2021-11-24
Supplement: s1 [file s1]

# Microbial Community Dynamics During Biodegradation of Crude Oil and Its Response to Biostimulation in Svalbard Seawater at Low Temperature

Hiie Nõlvak, Nga [Phuong Dang](#), Marika Truu, Angela Peeb, Kertu Tiirik, Megan O'Sadnick, and Jaak Truu

## Supplementary 1

The list of bacterial genera (A) and archaeal genera (B) containing oil hydrocarbon-degrading organisms (in alphabetical order) based on literature (at the date of 20.10.2021).

| Genus                               | Class               | Phylum         | Reference               |
|-------------------------------------|---------------------|----------------|-------------------------|
| <b>A</b>                            |                     |                |                         |
| Abyssivirga/Vallitalea <sup>1</sup> | Clostridia          | Firmicutes     | [1]                     |
| Achromobacter                       | Betaproteobacteria  | Proteobacteria | [2]                     |
| Acidocella                          | Alphaproteobacteria | Proteobacteria | [3]                     |
| Acidovorax                          | Betaproteobacteria  | Proteobacteria | [4]                     |
| Acinetobacter                       | Gammaproteobacteria | Proteobacteria | [5; 6; 7]               |
| Actinomyces                         | Actinomycetia       | Actinobacteria | [8]                     |
| Actinoplanes                        | Actinomycetia       | Actinobacteria | [8]                     |
| Actinopolyspora                     | Actinomycetia       | Actinobacteria | [9]                     |
| Advenella                           | Betaproteobacteria  | Proteobacteria | [10]                    |
| Aequorivita                         | Flavobacteriia      | Bacteroidetes  | [11]                    |
| Aeribacillus                        | Bacilli             | Firmicutes     | [2]                     |
| Aeromicrobium                       | Actinomycetia       | Actinobacteria | [7]                     |
| Aeromonas                           | Gammaproteobacteria | Proteobacteria | [12]                    |
| Aestuariibacter                     | Gammaproteobacteria | Proteobacteria | [13]                    |
| Aestuariicella                      | Gammaproteobacteria | Proteobacteria | [14]                    |
| Afipia                              | Alphaproteobacteria | Proteobacteria | [15]                    |
| Agrobacterium                       | Alphaproteobacteria | Proteobacteria | [16]                    |
| Agrococcus                          | Actinomycetia       | Actinobacteria | [7]                     |
| Alcaligenes                         | Betaproteobacteria  | Proteobacteria | [17]                    |
| Alcanivorax                         | Gammaproteobacteria | Proteobacteria | [2; 13; 18; 19; 20; 21] |
| Algiphilus                          | Gammaproteobacteria | Proteobacteria | [21]                    |
| Algoriphagus                        | Cytophagia          | Bacteroidetes  | [13]                    |
| Alicyclophilus                      | Betaproteobacteria  | Proteobacteria | [22]                    |
| Alicyclobacillus                    | Bacilli             | Firmicutes     | [23]                    |
| Aliiglaciecola                      | Gammaproteobacteria | Proteobacteria | [24]                    |
| Alkanibacter                        | Gammaproteobacteria | Proteobacteria | [25]                    |
| Alkanindiges                        | Gammaproteobacteria | Proteobacteria | [7]                     |
| Altererythrobacter                  | Alphaproteobacteria | Proteobacteria | [26]                    |
| Alteromonas                         | Gammaproteobacteria | Proteobacteria | [2]                     |
| Amphritea                           | Gammaproteobacteria | Proteobacteria | [27]                    |
| Amycolatopsis                       | Actinomycetia       | Actinobacteria | [28]                    |

| Genus                    | Class                 | Phylum         | Reference       |
|--------------------------|-----------------------|----------------|-----------------|
| Anabaena                 |                       | Cyanobacteria  | [29]            |
| Aneurinibacillus         | Bacilli               | Firmicutes     | [30]            |
| Anoxybacillus            | Bacilli               | Firmicutes     | [31]            |
| Aphanocapsa              |                       | Cyanobacteria  | [32]            |
| Aphanothece/Coccochloris |                       | Cyanobacteria  | [33]            |
| Aquamicrobium            | Alphaproteobacteria   | Proteobacteria | [34]            |
| Arenibacter              | Flavobacteriia        | Bacteroidetes  | [35]            |
| Aromatoleum              | Betaproteobacteria    | Proteobacteria | [36]            |
| Arthrobacter             | Actinomycetia         | Actinobacteria | [7; 37; 38]     |
| Azoarcus                 | Betaproteobacteria    | Proteobacteria | [36]            |
| Azospirillum             | Alphaproteobacteria   | Proteobacteria | [7]             |
| Azotobacter              | Gammaproteobacteria   | Proteobacteria | [39]            |
| Bacillus                 | Bacilli               | Firmicutes     | [2; 40; 41; 42] |
| Beijerinckia             | Alphaproteobacteria   | Proteobacteria | [43]            |
| Bergeyella               | Flavobacteriia        | Bacteroidetes  | [35]            |
| Bermanella               | Gammaproteobacteria   | Proteobacteria | [44; 45]        |
| Bizionia                 | Flavobacteriia        | Bacteroidetes  | [46]            |
| Blastochloris            | Alphaproteobacteria   | Proteobacteria | [47]            |
| Blastococcus             | Actinomycetia         | Actinobacteria | [7]             |
| Bordetella               | Betaproteobacteria    | Proteobacteria | [48]            |
| Bosea                    | Alphaproteobacteria   | Proteobacteria | [38]            |
| Brachybacterium          | Actinomycetia         | Actinobacteria | [49]            |
| Brachymonas              | Betaproteobacteria    | Proteobacteria | [50]            |
| Bradyrhizobium           | Alphaproteobacteria   | Proteobacteria | [38]            |
| Brevibacillus            | Bacilli               | Firmicutes     | [51]            |
| Brevibacterium           | Actinomycetia         | Actinobacteria | [52]            |
| Brevundimonas            | Alphaproteobacteria   | Proteobacteria | [53]            |
| Burkholderia             | Betaproteobacteria    | Proteobacteria | [6; 38]         |
| Campylobacter            | Epsilonproteobacteria | Proteobacteria | [42]            |
| Carboxylicivirga         | Bacteroidia           | Bacteroidetes  | [35]            |
| Castellaniella           | Betaproteobacteria    | Proteobacteria | [54]            |
| Caulobacter              | Alphaproteobacteria   | Proteobacteria | [23]            |
| Celeribacter             | Alphaproteobacteria   | Proteobacteria | [13]            |
| Cellulomonas             | Actinomycetia         | Actinobacteria | [7]             |
| Cellulosimicrobium       | Actinomycetia         | Actinobacteria | [16]            |
| Chelatococcus            | Alphaproteobacteria   | Proteobacteria | [55]            |
| Chromobacterium          | Betaproteobacteria    | Proteobacteria | [17]            |
| Chromohalobacter         | Gammaproteobacteria   | Proteobacteria | [56]            |
| Chryseobacterium         | Flavobacteriia        | Bacteroidetes  | [35; 57]        |
| Citricella               | Alphaproteobacteria   | Proteobacteria | [13]            |
| Citricoccus              | Actinomycetia         | Actinobacteria | [7]             |
| Citrobacter              | Gammaproteobacteria   | Proteobacteria | [2]             |
| Clavibacter              | Actinomycetia         | Actinobacteria | [3]             |

| Genus                             | Class               | Phylum         | Reference       |
|-----------------------------------|---------------------|----------------|-----------------|
| Cloacibacterium                   | Flavobacteriia      | Bacteroidetes  | [58]            |
| Cobetia                           | Gammaproteobacteria | Proteobacteria | [59]            |
| Colwellia                         | Gammaproteobacteria | Proteobacteria | [60]            |
| Comamonas                         | Betaproteobacteria  | Proteobacteria | [4]             |
| Confluentimicrobium               | Alphaproteobacteria | Proteobacteria | [61]            |
| Corynebacterium                   | Actinomycetia       | Actinobacteria | [6; 52]         |
| Croceibacter                      | Flavobacteriia      | Bacteroidetes  | [62]            |
| Croceicoccus                      | Alphaproteobacteria | Proteobacteria | [63]            |
| Cryobacterium                     | Actinomycetia       | Actinobacteria | [64]            |
| Cupriavidus                       | Betaproteobacteria  | Proteobacteria | [65]            |
| Cycloclasticus                    | Gammaproteobacteria | Proteobacteria | [2; 17; 21; 66] |
| Cytophaga                         | Cytophagia          | Bacteroidetes  | [67]            |
| Dactylococcopsis                  |                     | Cyanobacteria  | [33]            |
| Dechloromonas                     | Betaproteobacteria  | Proteobacteria | [68]            |
| Defluviimonas                     | Alphaproteobacteria | Proteobacteria | [69]            |
| Delftia                           | Betaproteobacteria  | Proteobacteria | [70]            |
| Desulfatibacillum/Desulfobacillum | Deltaproteobacteria | Proteobacteria | [36]            |
| Desulfatiferula                   | Deltaproteobacteria | Proteobacteria | [71]            |
| Desulfatitalea                    | Deltaproteobacteria | Proteobacteria | [72]            |
| Desulfitobacterium                | Clostridia          | Firmicutes     | [73]            |
| Desulfobacterium                  | Deltaproteobacteria | Proteobacteria | [36]            |
| Desulfobacula                     | Deltaproteobacteria | Proteobacteria | [36]            |
| Desulfococcus                     | Deltaproteobacteria | Proteobacteria | [17]            |
| Desulfoglaeba                     | Deltaproteobacteria | Proteobacteria | [36]            |
| Desulfosarcina                    | Deltaproteobacteria | Proteobacteria | [36]            |
| Desulfosporosinus                 | Clostridia          | Firmicutes     | [36]            |
| Desulfothermus                    | Deltaproteobacteria | Proteobacteria | [74]            |
| Desulfotignum                     | Deltaproteobacteria | Proteobacteria | [36]            |
| Desulfotomaculum                  | Clostridia          | Firmicutes     | [36]            |
| Desulfovibrio                     | Deltaproteobacteria | Proteobacteria | [75]            |
| Devosia                           | Alphaproteobacteria | Proteobacteria | [38]            |
| Diaphorobacter                    | Betaproteobacteria  | Proteobacteria | [76]            |
| Dietzia                           | Actinomycetia       | Actinobacteria | [2; 7; 8]       |
| Dokdonella                        | Gammaproteobacteria | Proteobacteria | [77]            |
| Dyadobacter                       | Cytophagia          | Bacteroidetes  | [42]            |
| Dyella                            | Gammaproteobacteria | Proteobacteria | [78]            |
| Echinicola                        | Cytophagia          | Bacteroidetes  | [35]            |
| Edwardsiella                      | Gammaproteobacteria | Proteobacteria | [79]            |
| Ensifer                           | Alphaproteobacteria | Proteobacteria | [80]            |
| Enterobacter                      | Gammaproteobacteria | Proteobacteria | [2; 37]         |
| Enterococcus                      | Bacilli             | Firmicutes     | [41; 81]        |
| Eremococcus                       | Bacilli             | Firmicutes     | [37]            |
| Erwinia                           | Gammaproteobacteria | Proteobacteria | [82]            |

| Genus                        | Class               | Phylum         | Reference |
|------------------------------|---------------------|----------------|-----------|
| Erythrobacter/Lutibacterium  | Alphaproteobacteria | Proteobacteria | [83]      |
| Escherichia                  | Gammaproteobacteria | Proteobacteria | [57]      |
| Exiguobacterium              | Bacilli             | Firmicutes     | [84]      |
| Fabibacter                   | Cytophagia          | Bacteroidetes  | [13]      |
| Fictibacillus                | Bacilli             | Firmicutes     | [85]      |
| Flavobacterium               | Flavobacteriia      | Bacteroidetes  | [41]      |
| Franconibacter               | Gammaproteobacteria | Proteobacteria | [86]      |
| Frankia                      | Actinomycetia       | Actinobacteria | [38]      |
| Fusobacterium                | Fusobacteriia       | Fusobacteria   | [87]      |
| Gallaecimonas                | Gammaproteobacteria | Proteobacteria | [88]      |
| Garciella                    | Clostridia          | Firmicutes     | [89]      |
| Gemmobacter/Catellibacterium | Alphaproteobacteria | Proteobacteria | [26]      |
| Geobacillus                  | Bacilli             | Firmicutes     | [2]       |
| Geobacter                    | Deltaproteobacteria | Proteobacteria | [68]      |
| Georgenia                    | Actinomycetia       | Actinobacteria | [7]       |
| Georgfuchsia                 | Betaproteobacteria  | Proteobacteria | [90]      |
| Gillisia                     | Flavobacteriia      | Bacteroidetes  | [46]      |
| Glaciecola                   | Gammaproteobacteria | Proteobacteria | [91]      |
| Gordonia                     | Actinomycetia       | Actinobacteria | [2; 7; 8] |
| Granulosicoccus              | Gammaproteobacteria | Proteobacteria | [66]      |
| Haemophilus                  | Gammaproteobacteria | Proteobacteria | [92]      |
| Halioxenophilus              | Gammaproteobacteria | Proteobacteria | [93]      |
| Halomonas                    | Gammaproteobacteria | Proteobacteria | [59]      |
| Halothece                    |                     | Cyanobacteria  | [33]      |
| Herbaspirillum               | Betaproteobacteria  | Proteobacteria | [94]      |
| Herbiconiux                  | Actinomycetia       | Actinobacteria | [95]      |
| Herminiimonas                | Betaproteobacteria  | Proteobacteria | [96]      |
| Hoeflea                      | Alphaproteobacteria | Proteobacteria | [97]      |
| Hoyosella/Amycolalicoccus    | Actinomycetia       | Actinobacteria | [98]      |
| Hydrocarboniphaga            | Gammaproteobacteria | Proteobacteria | [99]      |
| Hydrogenophaga               | Betaproteobacteria  | Proteobacteria | [100]     |
| Hyphomicrobium               | Alphaproteobacteria | Proteobacteria | [101]     |
| Hyphomonas                   | Alphaproteobacteria | Proteobacteria | [102]     |
| Idiomarina                   | Gammaproteobacteria | Proteobacteria | [103]     |
| Immundisolibacter            | Gammaproteobacteria | Proteobacteria | [104]     |
| Isoptericola                 | Actinomycetia       | Actinobacteria | [105]     |
| Janibacter                   | Actinomycetia       | Actinobacteria | [106]     |
| Jannaschia                   | Alphaproteobacteria | Proteobacteria | [26]      |
| Janthinobacterium            | Betaproteobacteria  | Proteobacteria | [15]      |
| Kaistia                      | Alphaproteobacteria | Proteobacteria | [107]     |
| Ketobacter                   | Gammaproteobacteria | Proteobacteria | [108]     |
| Klebsiella                   | Gammaproteobacteria | Proteobacteria | [12]      |
| Kocuria                      | Actinomycetia       | Actinobacteria | [7]       |

| Genus                   | Class               | Phylum         | Reference    |
|-------------------------|---------------------|----------------|--------------|
| Kordia                  | Flavobacteriia      | Bacteroidetes  | [109]        |
| Kordiimonas             | Alphaproteobacteria | Proteobacteria | [110]        |
| Krasilnikovella         | Actinomycetia       | Actinobacteria | [7]          |
| Kurthia                 | Bacilli             | Firmicutes     | [111]        |
| Kytococcus              | Actinomycetia       | Actinobacteria | [112]        |
| Labrenzia               | Alphaproteobacteria | Proteobacteria | [103]        |
| Lactobacillus           | Bacilli             | Firmicutes     | [113]        |
| Leclercia               | Gammaproteobacteria | Proteobacteria | [114]        |
| Legionella              | Gammaproteobacteria | Proteobacteria | [115]        |
| Leifsonia               | Actinomycetia       | Actinobacteria | [51]         |
| Leptothrix              | Betaproteobacteria  | Proteobacteria | [15]         |
| Leucothrix              | Gammaproteobacteria | Proteobacteria | [113]        |
| Loktanella              | Alphaproteobacteria | Proteobacteria | [26]         |
| Luteibacter             | Gammaproteobacteria | Proteobacteria | [116]        |
| Luteimonas              | Gammaproteobacteria | Proteobacteria | [117]        |
| Lysinibacillus          | Bacilli             | Firmicutes     | [2]          |
| Lysobacter              | Gammaproteobacteria | Proteobacteria | [118]        |
| Magnetospirillum        | Alphaproteobacteria | Proteobacteria | [36]         |
| Maribacter              | Flavobacteriia      | Bacteroidetes  | [62]         |
| Maribius                | Alphaproteobacteria | Proteobacteria | [46]         |
| Maricaulis              | Alphaproteobacteria | Proteobacteria | [119; 120]   |
| Marinobacter            | Gammaproteobacteria | Proteobacteria | [13; 21; 66] |
| Marinobacterium         | Gammaproteobacteria | Proteobacteria | [121]        |
| Marinomonas             | Gammaproteobacteria | Proteobacteria | [17]         |
| Marinosulfonomonas      | Alphaproteobacteria | Proteobacteria | [122]        |
| Maritimibacter          | Alphaproteobacteria | Proteobacteria | [123]        |
| Martella                | Alphaproteobacteria | Proteobacteria | [124]        |
| Massilia                | Betaproteobacteria  | Proteobacteria | [15]         |
| Merismopedia/Agmenellum |                     | Cyanobacteria  | [125]        |
| Mesoflavibacter         | Flavobacteriia      | Bacteroidetes  | [35]         |
| Mesorhizobium           | Alphaproteobacteria | Proteobacteria | [38]         |
| Methylibium             | Betaproteobacteria  | Proteobacteria | [126]        |
| Methylobacterium        | Alphaproteobacteria | Proteobacteria | [38]         |
| Methyloversatilis       | Betaproteobacteria  | Proteobacteria | [127]        |
| Microbacterium          | Actinomycetia       | Actinobacteria | [6; 7]       |
| Microbulbifer           | Gammaproteobacteria | Proteobacteria | [103]        |
| Micrococcus             | Actinomycetia       | Actinobacteria | [7; 40; 42]  |
| Microcoleus             |                     | Cyanobacteria  | [8]          |
| Micromonospora          | Actinomycetia       | Actinobacteria | [7; 8]       |
| Microvirga              | Alphaproteobacteria | Proteobacteria | [128]        |
| Moraxella               | Gammaproteobacteria | Proteobacteria | [129]        |
| Mycobacterium           | Actinomycetia       | Actinobacteria | [2; 17]      |
| Myroides                | Flavobacteriia      | Bacteroidetes  | [35]         |

| Genus             | Class               | Phylum         | Reference            |
|-------------------|---------------------|----------------|----------------------|
| N47               | Deltaproteobacteria | Proteobacteria | [130]                |
| Neptuniibacter    | Gammaproteobacteria | Proteobacteria | [131]                |
| Neptunomonas      | Gammaproteobacteria | Proteobacteria | [21]                 |
| Nesiotobacter     | Alphaproteobacteria | Proteobacteria | [16]                 |
| Nevskia           | Gammaproteobacteria | Proteobacteria | [132]                |
| Nitratireductor   | Alphaproteobacteria | Proteobacteria | [16]                 |
| Nitrobacter       | Alphaproteobacteria | Proteobacteria | [38]                 |
| Nocardia          | Actinomycetia       | Actinobacteria | [8]                  |
| Nocardioides      | Actinomycetia       | Actinobacteria | [7]                  |
| Nocardiopsis      | Actinomycetia       | Actinobacteria | [133]                |
| Nostoc            |                     | Cyanobacteria  | [134]                |
| Novosphingobium   | Alphaproteobacteria | Proteobacteria | [2; 13; 38]          |
| Oceanibaculum     | Alphaproteobacteria | Proteobacteria | [135]                |
| Oceanicola        | Alphaproteobacteria | Proteobacteria | [136; 137]           |
| Oceanisphaera     | Gammaproteobacteria | Proteobacteria | [138]                |
| Oceanobacillus    | Bacilli             | Firmicutes     | [105]                |
| Ochrobactrum      | Alphaproteobacteria | Proteobacteria | [2]                  |
| Oleigrimonas      | Gammaproteobacteria | Proteobacteria | [139]                |
| Oleibacter        | Gammaproteobacteria | Proteobacteria | [140]                |
| Oleiphilus        | Gammaproteobacteria | Proteobacteria | [21]                 |
| Oleispira         | Gammaproteobacteria | Proteobacteria | [2; 21; 46; 66; 141] |
| Oleomonas         | Alphaproteobacteria | Proteobacteria | [142]                |
| Oligotropha       | Alphaproteobacteria | Proteobacteria | [143]                |
| Olivibacter       | Sphingobacteriia    | Bacteroidetes  | [35]                 |
| Olleya            | Flavobacteriia      | Bacteroidetes  | [35]                 |
| Oscillatoria      |                     | Cyanobacteria  | [29]                 |
| Paenibacillus     | Bacilli             | Firmicutes     | [4]                  |
| Pandoraea         | Betaproteobacteria  | Proteobacteria | [2]                  |
| Pantoea           | Gammaproteobacteria | Proteobacteria | [144]                |
| Paraburkholderia  | Betaproteobacteria  | Proteobacteria | [145]                |
| Paracoccus        | Alphaproteobacteria | Proteobacteria | [146]                |
| Paraglaciicola    | Gammaproteobacteria | Proteobacteria | [147]                |
| Parapedobacter    | Sphingobacteriia    | Bacteroidetes  | [35]                 |
| Paraperlucidibaca | Gammaproteobacteria | Proteobacteria | [27]                 |
| Parvibaculum      | Alphaproteobacteria | Proteobacteria | [148]                |
| Pasteurella       | Gammaproteobacteria | Proteobacteria | [149]                |
| Pedobacter        | Sphingobacteriia    | Bacteroidetes  | [35; 150]            |
| Pelagibaca        | Alphaproteobacteria | Proteobacteria | [13]                 |
| Pelobacter        | Deltaproteobacteria | Proteobacteria | [151]                |
| Peptococcus       | Clostridia          | Firmicutes     | [113]                |
| Perlucidibaca     | Gammaproteobacteria | Proteobacteria | [152]                |
| Phenylobacterium  | Alphaproteobacteria | Proteobacteria | [38]                 |
| Phormidium        |                     | Cyanobacteria  | [153]                |

| Genus             | Class               | Phylum         | Reference          |
|-------------------|---------------------|----------------|--------------------|
| Planococcus       | Bacilli             | Firmicutes     | [154]              |
| Planomicrobium    | Bacilli             | Firmicutes     | [155]              |
| Plantibacter      | Actinomycetia       | Actinobacteria | [64]               |
| Plectonema        |                     | Cyanobacteria  | [32]               |
| Polaribacter      | Flavobacteriia      | Bacteroidetes  | [13]               |
| Polaromonas       | Betaproteobacteria  | Proteobacteria | [156]              |
| Polycyclovorans   | Gammaproteobacteria | Proteobacteria | [21]               |
| Polymorphum       | Alphaproteobacteria | Proteobacteria | [157]              |
| Porphyrobacter    | Alphaproteobacteria | Proteobacteria | [158]              |
| Porticoccus       | Gammaproteobacteria | Proteobacteria | [21]               |
| Prauserella       | Actinomycetia       | Actinobacteria | [159]              |
| Profundimonas     | Gammaproteobacteria | Proteobacteria | [160]              |
| Proteus           | Gammaproteobacteria | Proteobacteria | [12]               |
| Pseudidiomarina   | Gammaproteobacteria | Proteobacteria | [103]              |
| Pseudoalteromonas | Gammaproteobacteria | Proteobacteria | [13; 17; 59; 66]   |
| Pseudomonas       | Gammaproteobacteria | Proteobacteria | [2; 7; 37; 42; 66] |
| Pseudonocardia    | Actinomycetia       | Actinobacteria | [7; 38]            |
| Pseudoxanthomonas | Gammaproteobacteria | Proteobacteria | [161]              |
| Psychrobacter     | Gammaproteobacteria | Proteobacteria | [66; 162]          |
| Pusillimonas      | Betaproteobacteria  | Proteobacteria | [163]              |
| Rahnella          | Gammaproteobacteria | Proteobacteria | [164]              |
| Ralstonia         | Betaproteobacteria  | Proteobacteria | [165]              |
| Ramlibacter       | Betaproteobacteria  | Proteobacteria | [166]              |
| Rhizobium         | Alphaproteobacteria | Proteobacteria | [15]               |
| Rhodanobacter     | Gammaproteobacteria | Proteobacteria | [167]              |
| Rhodobacter       | Alphaproteobacteria | Proteobacteria | [168]              |
| Rhodococcus       | Actinomycetia       | Actinobacteria | [2; 8; 13; 66]     |
| Rhodoferax        | Betaproteobacteria  | Proteobacteria | [169]              |
| Rhodovulum        | Alphaproteobacteria | Proteobacteria | [170]              |
| Robiginitomaculum | Alphaproteobacteria | Proteobacteria | [46]               |
| Roseivirga        | Cytophagia          | Bacteroidetes  | [13]               |
| Roseivivax        | Alphaproteobacteria | Proteobacteria | [26]               |
| Roseobacter       | Alphaproteobacteria | Proteobacteria | [171]              |
| Roseomonas        | Alphaproteobacteria | Proteobacteria | [7]                |
| Roseovarius       | Alphaproteobacteria | Proteobacteria | [172]              |
| Ruegeria          | Alphaproteobacteria | Proteobacteria | [40]               |
| Rugosibacter      | Betaproteobacteria  | Proteobacteria | [173]              |
| Saccharothrix     | Actinomycetia       | Actinobacteria | [174]              |
| Salinicola        | Gammaproteobacteria | Proteobacteria | [175]              |
| Salinisphaera     | Gammaproteobacteria | Proteobacteria | [176]              |
| Salinivibrio      | Gammaproteobacteria | Proteobacteria | [56]               |
| Salipiger         | Alphaproteobacteria | Proteobacteria | [26]               |
| Sanguibacter      | Actinomycetia       | Actinobacteria | [64]               |

| Genus                    | Class               | Phylum                  | Reference   |
|--------------------------|---------------------|-------------------------|-------------|
| Sarcina                  | Clostridia          | Firmicutes              | [17]        |
| Serratia                 | Gammaproteobacteria | Proteobacteria          | [17]        |
| Shewanella               | Gammaproteobacteria | Proteobacteria          | [66]        |
| Shinella                 | Alphaproteobacteria | Proteobacteria          | [143]       |
| Sinorhizobium            | Alphaproteobacteria | Proteobacteria          | [15]        |
| Smaragdicoccus           | Actinomycetia       | Actinobacteria          | [177]       |
| Smithella                | Deltaproteobacteria | Proteobacteria          | [36]        |
| Sneathiella              | Alphaproteobacteria | Proteobacteria          | [91]        |
| Solimonas/Singularimonas | Gammaproteobacteria | Proteobacteria          | [176]       |
| Sphaerotilus             | Betaproteobacteria  | Proteobacteria          | [178]       |
| Sphingobacterium         | Sphingobacteriia    | Bacteroidetes           | [41]        |
| Sphingobium              | Alphaproteobacteria | Proteobacteria          | [2]         |
| Sphingomonas             | Alphaproteobacteria | Proteobacteria          | [2; 37; 38] |
| Sphingopyxis             | Alphaproteobacteria | Proteobacteria          | [179]       |
| Sphingorhabdus           | Alphaproteobacteria | Proteobacteria          | [180]       |
| Spirillum                | Betaproteobacteria  | Proteobacteria          | [67]        |
| Spongiibacter            | Gammaproteobacteria | Proteobacteria          | [46]        |
| Staphylococcus           | Bacilli             | Firmicutes              | [2]         |
| Stappia                  | Alphaproteobacteria | Proteobacteria          | [105]       |
| Stenotrophomonas         | Gammaproteobacteria | Proteobacteria          | [52]        |
| Streptobacillus          | Fusobacteriia       | Fusobacteria            | [2]         |
| Streptococcus            | Bacilli             | Firmicutes              | [40]        |
| Streptomonospora         | Actinomycetia       | Actinobacteria          | [181]       |
| Streptomyces             | Actinomycetia       | Actinobacteria          | [7; 8]      |
| Streptosporangium        | Actinomycetia       | Actinobacteria          | [8]         |
| Sulfitobacter            | Alphaproteobacteria | Proteobacteria          | [40]        |
| Tenacibaculum            | Flavobacteriia      | Bacteroidetes           | [13]        |
| Terrabacter              | Actinomycetia       | Actinobacteria          | [182]       |
| Terrimonas               | Chitinophagia       | Bacteroidetes           | [183]       |
| Thalassobius             | Alphaproteobacteria | Proteobacteria          | [184]       |
| Thalassolituus           | Gammaproteobacteria | Proteobacteria          | [21; 185]   |
| Thalassospira            | Alphaproteobacteria | Proteobacteria          | [21; 46]    |
| Thauera                  | Betaproteobacteria  | Proteobacteria          | [36]        |
| Thermoleophilum          | Thermoleuphilia     | Actinobacteria          | [186]       |
| Thermus                  | Deinococci          | Deinococcus-<br>Thermus | [187]       |
| Thiobacillus             | Betaproteobacteria  | Proteobacteria          | [15]        |
| Thioclava                | Alphaproteobacteria | Proteobacteria          | [13]        |
| Tistrella                | Alphaproteobacteria | Proteobacteria          | [176]       |
| Trabulsiella             | Gammaproteobacteria | Proteobacteria          | [188]       |
| Tranquillimonas          | Alphaproteobacteria | Proteobacteria          | [83]        |
| Tropicibacter            | Alphaproteobacteria | Proteobacteria          | [17]        |
| Tropicimonas             | Alphaproteobacteria | Proteobacteria          | [189]       |
| Tsukamurella             | Actinomycetia       | Actinobacteria          | [190]       |



| Genus            | Class               | Phylum         | Reference |
|------------------|---------------------|----------------|-----------|
| Ulviabacter      | Flavobacteriia      | Bacteroidetes  | [191]     |
| Vallitalea       | Clostridia          | Firmicutes     | [36]      |
| Variovorax       | Betaproteobacteria  | Proteobacteria | [192]     |
| Vibrio           | Gammaproteobacteria | Proteobacteria | [193]     |
| Weeksella        | Flavobacteriia      | Bacteroidetes  | [194]     |
| Williamsia       | Actinomycetia       | Actinobacteria | [7]       |
| Winogradskyella  | Flavobacteriia      | Bacteroidetes  | [13]      |
| Xanthobacter     | Alphaproteobacteria | Proteobacteria | [195]     |
| Xanthomonas      | Gammaproteobacteria | Proteobacteria | [17]      |
| Xylanimicrobium  | Actinomycetia       | Actinobacteria | [7]       |
| Xylella          | Gammaproteobacteria | Proteobacteria | [194]     |
| Yeosuana         | Flavobacteriia      | Bacteroidetes  | [35]      |
| Zavarzinia       | Alphaproteobacteria | Proteobacteria | [196]     |
| Zhongshania      | Gammaproteobacteria | Proteobacteria | [197]     |
| Zobellella       | Gammaproteobacteria | Proteobacteria | [198]     |
| Zobellia         | Flavobacteriia      | Bacteroidetes  | [13]      |
| Zoogloea         | Betaproteobacteria  | Proteobacteria | [199]     |
| Zunongwangia     | Flavobacteriia      | Bacteroidetes  | [200]     |
| <b>B</b>         |                     |                |           |
| Archaeoglobus    | Archaeoglobi        | Euryarchaeota  | [36]      |
| Geoglobus        | Archaeoglobi        | Euryarchaeota  | [36]      |
| Haloarcula       | Halobacteria        | Euryarchaeota  | [201]     |
| Halobacterium    | Halobacteria        | Euryarchaeota  | [201]     |
| Halococcus       | Halobacteria        | Euryarchaeota  | [201]     |
| Haloferax        | Halobacteria        | Euryarchaeota  | [201]     |
| Halorientalis    | Halobacteria        | Euryarchaeota  | [202]     |
| Halorubrum       | Halobacteria        | Euryarchaeota  | [201]     |
| Haloterrigena    | Halobacteria        | Euryarchaeota  | [201]     |
| Halovivax        | Halobacteria        | Euryarchaeota  | [203]     |
| Natrialba        | Halobacteria        | Euryarchaeota  | [201]     |
| Natronococcus    | Halobacteria        | Euryarchaeota  | [204]     |
| Natronolimnobius | Halobacteria        | Euryarchaeota  | [204]     |
| Natronomonas     | Halobacteria        | Euryarchaeota  | [204]     |

<sup>1</sup> According to Postec *et al* (2017) the genus *Abyssivirga* should be reassigned to the genus *Vallitalea* [205].

- Schouw, A.; Eide, T.L.; Stokke, R.; Pedersen, R.B.; Steen, I.H.; Bødtker, G. *Abyssivirga alkaniphila* gen. nov.; sp. nov.; an alkane-degrading, anaerobic bacterium from a deep-sea hydrothermal vent system, and emended descriptions of *Natranaerovirga pectinivora* and *Natranaerovirga hydrolytica*. *Int. J. Syst. Evol. Microbiol.* **2016**, *66*(4), 1724–1734, doi:10.1099/ijsem.0.000934.
- Xu, X.; Liu, W.; Tian, S.; Wang, W.; Qi, Q.; Jiang, P.; Gao, X.; Li, F.; Li, H.; Yu, H. Petroleum Hydrocarbon-Degrading Bacteria for the Remediation of Oil Pollution Under Aerobic Conditions: A Perspective Analysis. *Front. Microbiol.* **2018**, *9*, doi:10.3389/fmicb.2018.02885.

3. Dore, S.Y.; Clancy, Q.E.; Rylee, S.M.; Kulpa, C.F. Naphthalene-utilizing and mercury-resistant bacteria isolated from an acidic environment. *Appl. Microbiol. Biotechnol.* **2003**, *63*(2), 194–199, doi:10.1007/s00253-003-1378-4.
4. Meyer, S.; Moser, R.; Neef, A.; Stahl, U.; Kämpfer, P. Differential detection of key enzymes of polyaromatic-hydrocarbon-degrading bacteria using PCR and gene probes. *Microbiology*, **1999**, *145*(7), 1731–1741, doi:10.1099/13500872-145-7-1731.
5. Fatajeva, E.; Gailiūtė, I.; Paliulis, D.; Grigiškis, S. The use of *Acinetobacter* sp. for oil hydrocarbon degradation in saline waters. *Biologija*, **2014**, *60*(3), doi:10.6001/biologija.v60i3.2971.
6. Muthukamalam, S.; Sivagangavathi, S.; Dhreshya, D.; Sudha Rani, S. Characterization of dioxygenases and biosurfactants produced by crude oil degrading soil bacteria. *Braz. J. Microbiol.* **2017**, *48*(4), 637–647, doi:10.1016/j.bjm.2017.02.007.
7. Ali, N.; Dashti, N.; Khanafer, M.; Al-Awadhi, H.; Radwan, S. Bioremediation of soils saturated with spilled crude oil. *Sci. Rep.* **2020**, *10*(1), doi:10.1038/s41598-019-57224-x.
8. Shakya, M.; Verma, P.; Kumar, S.; Sandhu, S.S. Microbes: A Novel Source of Bioremediation for Degradation of Hydrocarbons. In *Microbial Rejuvenation of Polluted Environment*. Springer, Singapore, **2021**, pp. 247–261, doi:10.1007/978-981-15-7447-4\_10.
9. Hamedi, J.; Mohammadipanah, F.; Ventosa, A. Systematic and biotechnological aspects of halophilic and halotolerant actinomycetes. *Extremophiles*. **2013**, *17*, 1–13, doi:10.1007/s00792-012-0493-5.
10. Wang, X.; Jin, D.; Zhou, L.; Wu, L.; An, W.; Zhao, L. Draft Genome Sequence of *Advenella kashmirensis* Strain W13003, a Polycyclic Aromatic Hydrocarbon-Degrading Bacterium. *Genome Announc.* **2014**, *2*(1), doi:10.1128/genomea.00003-14.
11. Perez Calderon, L.J.; Gontikaki, E.; Potts, L.D.; Shaw, S.; Gallego, A.; Anderson, J.A.; Witte, U. Pressure and temperature effects on deep-sea hydrocarbon-degrading microbial communities in subarctic sediments. *MicrobiologyOpen*, **2019**, *8*(6), doi:10.1002/mbo3.768.
12. Odokuma, L.O.; Dickson, A.A. Bioremediation of a crude oil polluted tropical rain forest soil. *Glob. J. Environ. Sci.* **2004**, *2*(1), 29–40, doi:10.4314/gjes.v2i1.2403.
13. Wang, W.; Zhong, R.; Shan, D.; Shao, Z. Indigenous oil-degrading bacteria in crude oil-contaminated seawater of the Yellow sea, China. *Appl. Microbiol. Biotechnol.* **2014**, *98*(16), 7253–7269, doi:10.1007/s00253-014-5817-1.
14. Lo, N.; Kim, K.H.; Baek, K.; Jia, B.; Jeon, C.O. *Aestuariicella hydrocarbonica* gen. nov.; sp. Nov.; an aliphatic hydrocarbon-degrading bacterium isolated from a sea tidal flat. *Int. J. Syst. Evol. Microbiol.* **2015**, *65*(6), 1935–1940, doi:10.1099/ijs.0.000199.
15. Bodour, A.A.; Wang, J.M.; Brusseau, M.L.; Maier, R.M. Temporal change in culturable phenanthrene degraders in response to long-term exposure to phenanthrene in a soil column system. *Environ. Microbiol.* **2003**, *5*(10), 888–895, doi:10.1046/j.1462-2920.2003.00481.x.
16. Dashti, N.; Ali, N.; Eliyas, M.; Khanafer, M.; Sorkhoh, N.A.; Radwan, S.S. Most hydrocarbonoclastic bacteria in the total environment are diazotrophic, which highlights their value in the bioremediation of hydrocarbon contaminants. *Microbes Environ.* **2015**, *30*(1), 70–75, doi:10.1264/jsme2.ME14090.
17. Xue, J.; Yu, Y.; Bai, Y.; Wang, L.; Wu, Y. Marine Oil-Degrading Microorganisms and Biodegradation Process of Petroleum Hydrocarbon in Marine Environments: A Review. *Curr. Microbiol.* **2015**, *71*(2), 220–228, doi:10.1007/s00284-015-0825-7.
18. Yakimov, M.M.; Golyshin, P.N.; Lang, S.; Moore, E.R.B.; Abraham, W.R.; Lünsdorf, H.; Timmis, K. N. *Alcanivorax borkumensis* gen. nov.; sp. nov.; a new, hydrocarbon-

- degrading and surfactant-producing marine bacterium. *Int. J. Syst. Bacteriol.* **1998**, 48(2), 339–348, doi:10.1099/00207713-48-2-339.
19. Hara, A.; Syutsubo, K.; Harayama, S. Alcanivorax which prevails in oil-contaminated seawater exhibits broad substrate specificity for alkane degradation. *Environ. Microbiol.* **2003**, 5(9), 746–753, doi:10.1046/j.1468-2920.2003.00468.x.
  20. Hara, A.; Baik, S.H.; Syutsubo, K.; Misawa, N.; Smits, T.H.M.; Van Beilen, J.B.; Harayama, S. Cloning and functional analysis of alkB genes in Alcanivorax borkumensis SK2. *Environ. Microbiol.* **2004**, 6(3), 191–197, doi:10.1046/j.1462-2920.2003.00550.x.
  21. Berry, D.; Gutierrez, T. Evaluating the detection of hydrocarbon-degrading bacteria in 16S rRNA gene sequencing surveys. *Front. Microbiol.* **2017**, 8, 896, doi:10.3389/fmicb.2017.00896.
  22. Weelink, S.A.B.; Tan, N.C.G.; Ten Broeke, H.; Van Den Kieboom, C.; Van Doesburg, W.; Langenhoff, A.A.M.; Gerritse, J.; Junca, H.; Stams, A.J.M. Isolation and characterization of Alicyclophilus denitrificans strain BC, which grows on benzene with chlorate as the electron acceptor. *Appl. Environ. Microbiol.* **2008**, 74, 6672–6681, doi:10.1128/AEM.00835-08.
  23. Yang, S.; Wen, X.; Zhao, L.; Shi, Y.; Jin, H. Crude oil treatment leads to shift of bacterial communities in soils from the deep active layer and upper permafrost along the China-Russia Crude Oil Pipeline route. *PLoS ONE*, **2014**, 9(5), doi:10.1371/journal.pone.0096552.
  24. Jin, H. M.; Jeong, H.I.; Jeon, C.O. Aliiglaciecola aliphaticivorans sp. nov.; an aliphatic hydrocarbon-degrading bacterium, isolated from a sea-tidal flat and emended description of the genus Aliiglaciecola Jean et al. 2013. *Int. J. Syst. Evol. Microbiol.* **2015**, 65(5), 1550–1555, doi:10.1099/ij.s.0.000133.
  25. Friedrich, M.M.; Lipski, A. Alkanibacter difficilis gen. nov.; sp. nov. and Singularimonas variicoloris gen. nov.; sp. nov.; hexane-degrading bacteria isolated from a hexane-treated biofilter. *Int. J. Syst. Evol. Microbiol.* **2008**, 58(10), 2324–2329, doi:10.1099/ij.s.0.65517-0.
  26. Harwati, T.U.; Kasai, Y.; Kodama, Y.; Susilaningih, D.; Watanabe, K. Characterization of Diverse Hydrocarbon-Degrading Bacteria Isolated from Indonesian Seawater. *Microbes Environ.* **2007**, 22(4), 412–415, doi:10.1264/jsme2.22.412.
  27. Murphy, S.M.C.; Bautista, M.A.; Cramm, M.A.; Hubert, C.R.J. Biodegradation of diesel and crude oil by Labrador Sea cold adapted microbial communities. *Appl. Environ. Microbiol.* **2021**, 87(20), doi:10.1128/aem.00800-21.
  28. Bourguignon, N.; Isaac, P.; Alvarez, H.; Amoroso, M.J.; Ferrero, M.A. Enhanced polyaromatic hydrocarbon degradation by adapted cultures of actinomycete strains. *J. Basic Microbiol.* **2014**, 54(12), 1288–1294, doi:10.1002/jobm.201400262.
  29. Gamila, H.A.; Ibrahim, M.B.M.; Abd El-Ghafar, H.H. The role of cyanobacterial isolated strains in the biodegradation of crude oil. *Int. J. Environ. Stud.* **2003**, 60(5), 435–444, doi:10.1080/0020723032000050367.
  30. Godheja, J.; Shekhar, S.K.; Satyanarayan, G.N.V.; Modi, D.R. Antibiotic and Heavy Metal Tolerance of Some Indigenous Bacteria Isolated From Petroleum Contaminated Soil Sediments with A Study of Their Aromatic Hydrocarbon Degradation Potential. *Int. J. Curr. Microbiol. Appl. Sci.* **2017**, 6(3), 194–211, doi:10.20546/ijcmas.2017.603.021.
  31. Yusoff, D.F.; Rahman, R.N.Z.R.A.; Masomian, M.; Ali, M.S.M.; Leow, T.C. Newly isolated alkane hydroxylase and lipase producing geobacillus and anoxybacillus species involved in crude oil degradation. *Catalysts*, **2020**, 10(8), doi:10.3390/catal10080851.
  32. Raghukumar, C.; Vipparthy, V.; David, J.J.; Chandramohan, D. Degradation of crude oil by marine cyanobacteria. *Appl. Microbiol. Biotechnol.* **2001**, 57(3), 433–436, doi:10.1007/s002530100784.

33. Abed, R.M.M.; Köster, J. The direct role of aerobic heterotrophic bacteria associated with cyanobacteria in the degradation of oil compounds. *Int. Biodeterior. Biodegradation*, **2005**, *55*(1), 29–37, doi:10.1016/j.ibiod.2004.07.001.
34. Tzintzun-Camacho, O.; Loera, O.; Ramírez-Saad, H.C.; Gutiérrez-Rojas, M. Comparison of mechanisms of hexadecane uptake among pure and mixed cultures derived from a bacterial consortium. *Int. Biodeterior. Biodegradation*, **2012**, *70*, 1–7, doi:10.1016/j.ibiod.2012.01.009.
35. Kwon, K.; Kwon, Y.M.; Kim, S.-J. Aerobic Hydrocarbon-Degrading Bacteroidetes. In *Taxonomy, Genomics and Ecophysiology of Hydrocarbon-Degrading Microbes*. Springer International Publishing, **2019**, pp. 1–19, doi:10.1007/978-3-319-60053-6\_7-1.
36. Zhang, C.; Meckenstock, R.U.; Weng, S.; Wei, G.; Hubert, C.R.J.; Wang, J.H.; Dong, X. Marine sediments harbor diverse archaea and bacteria with the potential for anaerobic hydrocarbon degradation via fumarate addition. *FEMS Microbiol. Ecol.* **2021**, *97*(5), doi:10.1093/femsec/fiab045.
37. Bučková, M.; Puškarová, A.; Chovanová, K.; Kraková, L.; Ferianc, P.; Pangallo, D. A simple strategy for investigating the diversity and hydrocarbon degradation abilities of cultivable bacteria from contaminated soil. *World J. Microbiol. Biotechnol.* **2013**, *29*(6), 1085–1098, doi:10.1007/s11274-013-1277-5.
38. Yang, S.; Wen, X.; Shi, Y.; Liebner, S.; Jin, H.; Perfumo, A. Hydrocarbon degraders establish at the costs of microbial richness, abundance and keystone taxa after crude oil contamination in permafrost environments. *Sci. Rep.* **2016**, *6*, 37473, doi:10.1038/srep37473.
39. Gradova, N.B.; Gornova, I.B.; Eddaudi, R.; Salina, R.N. Use of Bacteria of the Genus *Azotobacter* for Bioremediation of Oil-Contaminated Soils. *Appl. Biochem. Microbiol.* **2003**, *39*(3), 279–281, doi:10.1023/A:1023579628148.
40. Ganesh Kumar, A.; Vijayakumar, L.; Joshi, G.; Magesh Peter, D.; Dharani, G.; Kirubakaran, R. Biodegradation of complex hydrocarbons in spent engine oil by novel bacterial consortium isolated from deep sea sediment. *Bioresour. Technol.* **2014**, *170*, 556–564, doi:10.1016/j.biortech.2014.08.008.
41. Albokari, M.; Mashhour, I.; Alshehri, M.; Boothman, C.; Al-Enezi, M. Characterization of microbial communities in heavy crude oil from Saudi Arabia. *Ann. Microbiol.* **2015**, *65*(1), 95–104, doi:10.1007/s13213-014-0840-0.
42. Olowomofe, T.O.; Oluyeye, J.O.; Aderiye, B.I.; Oluwole, O.A. Research article degradation of poly aromatic fractions of crude oil and detection of catabolic genes in hydrocarbon-degrading bacteria isolated from agbabu bitumen sediments in Ondo State. *AIMS Microbiol.* **2019**, *5*(4), 308–323, doi:10.3934/microbiol.2019.4.308.
43. Surovtseva, E.G.; Ivoilov, V.S.; Beliaev, S.S. [Physiologo-biochemical properties of a strain of *Beijerinckia mobilis* 1phi Phn+--a degrader of polycyclic aromatic hydrocarbons]. *Mikrobiologiya*, **1999**, *68*(6), 845–84550.
44. Ribicic, D.; Netzer, R.; Hazen, T.C.; Techtman, S.M.; Drabløs, F.; Brakstad, O.G. Microbial community and metagenome dynamics during biodegradation of dispersed oil reveals potential key-players in cold Norwegian seawater. *Mar. Pollut. Bull.* **2018**, *129*(1), 370–378, doi:10.1016/j.marpolbul.2018.02.034.
45. Hu, P.; Dubinsky, E.A.; Probst, A.J.; Wang, J.; Sieber, C.M.K.; Tom, L.M.; Gardinali, P.R.; Banfield, J.F.; Atlas, R.M.; Andersen, G.L. Simulation of Deepwater Horizon oil plume reveals substrate specialization within a complex community of hydrocarbon degraders. *Proc. Natl. Acad. Sci. U.S.A.* **2017**, *114*, 7432–7437, doi:10.1073/pnas.1703424114.
46. Guibert, L.M.; Loviso, C.L.; Marcos, M.S.; Commendatore, M.G.; Dionisi, H.M.; Lozada, M. Alkane Biodegradation Genes from Chronically Polluted Subantarctic Coastal

- Sediments and Their Shifts in Response to Oil Exposure. *Microb. Ecol.* **2012**, 64(3), 605–616, doi:10.1007/s00248-012-0051-9.
47. Zengler, K.; Heider, J.; Rosselló-Mora, R.; Widdel, F. Phototrophic utilization of toluene under anoxic conditions by a new strain of *Blastochloris sulfovirdis*. *Arch. Microbiol.* **1999**, 172(4), 204–212, doi:10.1007/s002030050761.
  48. Pinyakong, O.; Tiangda, K.; Iwata, K.; Omori, T. Isolation of novel phenanthrene-degrading bacteria from seawater and the influence of its physical factors on the degradation of phenanthrene. *ScienceAsia*, **2012**, 38(1), 36–43, doi:10.2306/scienceasia1513-1874.2012.38.036.
  49. Wang, Y.N.; Cai, H.; Chi, C.Q.; Lu, A.H.; Lin, X.G.; Jiang, Z.F.; Wu, X.L. *Halomonas shengliensis* sp. nov.; a moderately halophilic, denitrifying, crude-oil-utilizing bacterium. *Int. J. Syst. Evol. Microbiol.* **2007**, 57(6), 1222–1226, doi:10.1099/ijs.0.64973-0.
  50. Brzostowicz, P.C.; Walters, D.M.; Jackson, R.E.; Halsey, K.H.; Ni, H.; Rouvière, P.E. Proposed involvement of a soluble methane monooxygenase homologue in the cyclohexane-dependent growth of a new *Brachymonas* species. *Environ. Microbiol.* **2005**, 7(2), 179–190, doi:10.1111/j.1462-2920.2004.00681.x.
  51. Dashti, N.; Khanafer, M.; El-Nemr, I.; Sorkhoh, N.; Ali, N.; Radwan, S. The potential of oil-utilizing bacterial consortia associated with legume root nodules for cleaning oily soils. *Chemosphere*, **2009**, 74(10), 1354–1359, doi:10.1016/j.chemosphere.2008.11.028.
  52. Linda, A.; Bouziane, A. Petroleum-Oil biodegradation by *Corynebacterium aquaticum* and *Pseudomonas aeruginosa* strains isolated from the industrial rejection of the refinery of ARZEW-Algeria. *World Appl. Sci. J.* **2012**, 18(8), 1119–1123, doi:10.5829/idosi.wasj.2012.18.08.73.
  53. Chaîneau, C.H.; Morel, J.; Dupont, J.; Bury, E.; Oudot, J. Comparison of the fuel oil biodegradation potential of hydrocarbon-assimilating microorganisms isolated from a temperate agricultural soil. *Sci. Total Environ.* **1999**, 227(2–3), 237–247, doi:10.1016/S0048-9697(99)00033-9.
  54. Kämpfer, P.; Denger, K.; Cook, A.M.; Lee, S.T.; Jäckel, U.; Denner, E.B.M.; Busse, H.J. *Castellaniella* gen. nov.; to accommodate the phylogenetic lineage of *Alcaligenes defragrans*, and proposal of *Castellaniella defragrans* gen. nov.; comb. nov. and *Castellaniella denitrificans* sp. nov. *Int. J. Syst. Evol. Microbiol.* **2006**, 56(4), 815–819, doi:10.1099/ijs.0.63989-0.
  55. Salamanca, D.; Engesser, K.H. Isolation and characterization of two novel strains capable of using cyclohexane as carbon source. *Environ. Sci. Pollut. Res.* **2014**, 21(22), 12757–12766, doi:10.1007/s11356-014-3206-z.
  56. Al-Mailem, D.M.; Eliyas, M.; Radwan, S. Enhanced bioremediation of oil-polluted, hypersaline, coastal areas in Kuwait via vitamin-fertilization. *Environ. Sci. Pollut. Res.* **2014**, 21(5), 3386–3394, doi:10.1007/s11356-013-2293-6.
  57. Abbas, S.Z.; Whui, T.C.; Hossain, K.; Ahmad, A.; Rafatullah, M. Isolation and characterization of oil-degrading bacteria from marine sediment environment. *Desalin. Water Treat.* **2018**, 136, 282–289, doi:10.5004/dwt.2018.23110.
  58. Jurelevicius, D.; Alvarez, V.M.; Marques, J.M.; Lima, L.R.F. de S.; Dias, F. de A.; Seldin, L. Bacterial community response to petroleum hydrocarbon amendments in freshwater, marine, and hypersaline water-containing microcosms. *Appl. Environ. Microbiol.* **2013**, 79(19), 5927–5935, doi:10.1128/AEM.02251-13.
  59. Ferguson, R.M.W.; Gontikaki, E.; Anderson, J.A.; Witte, U. The variable influence of dispersant on degradation of oil hydrocarbons in subarctic deep-sea sediments at low temperatures (0–5 °C). *Sci. Rep.* **2017**, 7(1), doi:10.1038/s41598-017-02475-9.
  60. Bælum, J.; Borglin, S.; Chakraborty, R.; Fortney, J.L.; Lamendella, R.; Mason, O.U.; Auer, M.; Zemla, M.; Bill, M.; Conrad, M.E.; et al. Deep-sea bacteria enriched by oil and

- dispersant from the Deepwater Horizon spill. *Environ. Microbiol.* **2012**, *14*(9), 2405–2416, doi:10.1111/j.1462-2920.2012.02780.x.
61. Jeong, H.I.; Jin, H.M.; Jeon, C.O. Confluentimicrobium naphthalenivorans sp. Nov.; A naphthalene-degrading bacterium isolated from sea-tidal-flat sediment, and emended description of the genus Confluentimicrobium Park et al. 2015. *Int. J. Syst. Evol. Microbiol.* **2015**, *65*(11), 4191–4195, doi:10.1099/ijsem.0.000561.
  62. Catania, V.; Santisi, S.; Signa, G.; Vizzini, S.; Mazzola, A.; Cappello, S.; Yakimov, M.M.; Quatrini, P. Intrinsic bioremediation potential of a chronically polluted marine coastal area. *Mar. Pollut. Bull.* **2015**, *99*, 138–149, doi:10.1016/j.marpolbul.2015.07.042.
  63. Huang, Y.; Zeng, Y.; Feng, H.; Wu, Y.; Xu, X. Croceicoccus naphthovorans sp. nov.; a polycyclic aromatic hydrocarbons-degrading and acylhomoserine-lactone-producing bacterium isolated from marine biofilm, and emended description of the genus croceicoccus. *Int. J. Syst. Evol. Microbiol.* **2015**, *65*(5), 1531–1536, doi:10.1099/ijse.0.000132.
  64. Lo Giudice, A.; Casella, P.; Caruso, C.; Mangano, S.; Bruni, V.; de Domenico, M.; Michaud, L. Occurrence and characterization of psychrotolerant hydrocarbon-oxidizing bacteria from surface seawater along the Victoria Land coast (Antarctica). *Polar Biol.* **2010**, *33*(7), 929–943, doi:10.1007/s00300-010-0770-7.
  65. Wittich, R.M.; Wolff, P. Growth of the genetically engineered strain Cupriavidus necator RW112 with chlorobenzoates and technical chlorobiphenyls. *Microbiology*, **2007**, *153*(1), 186–195, doi:10.1099/mic.0.29096-0.
  66. Rizzo, C.; Malavenda, R.; Gerçe, B.; Papale, M.; Sylđatk, C.; Hausmann, R.; Bruni, V.; Michaud, L.; Giudice, A.L.; and Amalfitano, S. Effects of a simulated acute oil spillage on bacterial communities from arctic and antarctic marine sediments. *Microorganisms*, **2019**, *7*(12), 632, doi:10.3390/microorganisms7120632.
  67. Bossert, I.; Bartha, R. The fate of petroleum in soil ecosystems. In *Petroleum microbiology*. Macmillan, New York, **1984**, pp 435–473.
  68. Coates, J.B.; Chakraborty, R.; Lack, J.G.; O'Connor, S.M.; Cole, K.A.; Bender, K.S.; Achenbach, L.A. Anaerobic benzene oxidation coupled to nitrate reduction in pure culture by two strains of Dechloromonas. *Nature*, **2001**, *411*(6841), 1039–1043, doi:10.1038/35082545.
  69. Zhang, S.; Sun, C.; Xie, J.; Wei, H.; Hu, Z.; Wang, H. Defluviimonas pyrenivorans sp. nov.; a novel bacterium capable of degrading polycyclic aromatic hydrocarbons. *Int. J. Syst. Evol. Microbiol.* **2018**, *68*(3), 957–961, doi:10.1099/ijsem.0.002629.
  70. Shetty, A.R.; de Gannes, V.; Obi, C.C.; Lucas, S.; Lapidus, A.; Cheng, J.F.; Goodwin, L.A.; Pitluck, S.; Peters, L.; Mikhailova, N.; et al. Complete genome sequence of the phenanthrene-degrading soil bacterium Delftia acidovorans Cs1-4. *Stand. Genomic Sci.* **2015**, *10*, 55, doi:10.1186/s40793-015-0041-x.
  71. Cravo-Laureau, C.; Labat, C.; Joulain, C.; Matheron, R.; Hirschler-Réa, A. Desulfatiferula olefinivorans gen. nov.; sp. nov.; a long-chain n-alkene-degrading, sulfate-reducing bacterium. *Int. J. Syst. Evol. Microbiol.* **2007**, *57*(11), 2699–2702, doi:10.1099/ijse.0.65240-0.
  72. Higashioka, Y.; Kojima, H.; Watanabe, M.; Fukui, M. Desulfatitalea tepidiphila gen. nov.; sp. nov.; a sulfate-reducing bacterium isolated from tidal flat sediment. *Int. J. Syst. Evol. Microbiol.* **2013**, *63*, 761–765, doi:10.1099/ijse.0.043356-0.
  73. Kunapuli, U.; Jahn, M.K.; Lueders, T.; Geyer, R.; Heipieper, H.J.; Meckenstock, R.U. Desulfitobacterium aromaticivorans sp. nov. and Geobacter toluenoxydans sp. nov.; iron-reducing bacteria capable of anaerobic degradation of monoaromatic hydrocarbons. *Int. J. Syst. Evol. Microbiol.* **2010**, *60*(3), 686–695, doi:10.1099/ijse.0.003525-0.

74. Kuever, J.; Rainey, F.A.; Widdel, F. Class IV. Deltaproteobacteria class nov. In *Bergey's manual of systematic bacteriology*. Springer, Boston, **2005**, pp 948–955, doi:10.1007/0-387-29298-5\_3.
75. Davis, J.B.; Yarbrough, H.F. Anaerobic oxidation of hydrocarbons by *Desulfovibrio desulfuricans*. *Chem. Geol.* **1966**, *1*, 137–144, doi:10.1016/0009-2541(66)90012-X.
76. Klankeo, P.; Nopcharoenkul, W.; Pinyakong, O. Two novel pyrene-degrading *Diaphorobacter* sp. and *Pseudoxanthomonas* sp. isolated from soil. *J. Biosci. Bioeng.* **2009**, *108*(6), 488–495, doi:10.1016/j.jbiosc.2009.05.016.
77. Bacosa, H.P.; Inoue, C. Polycyclic aromatic hydrocarbons (PAHs) biodegradation potential and diversity of microbial consortia enriched from tsunami sediments in Miyagi, Japan. *J. Hazard. Mater.* **2015**, *283*, 689–697, doi:10.1016/j.jhazmat.2014.09.068.
78. Li, A.; Qu, Y.; Zhou, J.; Gou, M. Isolation and characteristics of a novel biphenyl-degrading bacterial strain, *Dyella ginsengisoli* LA-4. *J. Environ. Sci.* **2009**, *21*(2), 211–217, doi:10.1016/S1001-0742(08)62253-6.
79. Okpokwasili, G.C.; Okorie, B.B. Biodeterioration potentials of microorganisms isolated from car engine lubricating oil. *Tribol. Int.* **1988**, *21*(4), 215–220, doi:10.1016/0301-679X(88)90020-5.
80. Muratova, A.; Pozdnyakova, N.; Makarov, O.; Baboshin, M.; Baskunov, B.; Myasoedova, N.; Golovleva, L.; Turkovskaya, O. Degradation of phenanthrene by the rhizobacterium *Ensifer meliloti*. *Biodegradation*, **2014**, *25*, 787–795, doi:10.1007/s10532-014-9699-9.
81. Boontawan, A.; Boontawan, P. Isolation and characterization of *Jatropha* oildegradation by *Enterococcus faecalis* and *Burkholderia cenocepacia* W-1 under anaerobic condition. *Afr. J. Biotechnol.* **2011**, *10*(63), 13841–13851, doi:10.5897/ajb10.1720.
82. Saadoun, I.; Al-Akhras, M.A.; Abu-Ashour, J. Bacterial degradation of hydrocarbons as evidenced by respirometric analysis. *Microbios.* **1999**, *100*, 19–25.
83. Harwati, T.U.; Kasai, Y.; Kodama, Y.; Susilaningsih, D.; Watanabe, K. *Tranquillimonas alkanivorans* gen. nov.; sp. nov.; an alkane-degrading bacterium isolated from Semarang Port in Indonesia. *Int. J. Syst. Evol. Microbiol.* **2008**, *58*(9), 2118–2121, doi:10.1099/ijs.0.65817-0.
84. Mohanty, G.; Mukherji, S. Biodegradation rate of diesel range n-alkanes by bacterial cultures *Exiguobacterium aurantiacum* and *Burkholderia cepacia*. *Int. Biodeterior. Biodegradation*, **2008**, *61*(3), 240–250, doi:10.1016/j.ibiod.2007.06.011.
85. Pandey, R.; Sharma, P.; Rathee, S.; Singh, H.P.; Batish, D.R.; Krishnamurthy, B.; Kohli, R.K. Isolation and characterization of a novel hydrocarbonoclastic and biosurfactant producing bacterial strain: *Fictibacillus phosphorivorans* RP3. *3 Biotech*, **2021**, *11*(2), doi:10.1007/s13205-021-02655-5.
86. Pal, S.; Kundu, A.; Banerjee, T.D.; Mohapatra, B.; Roy, A.; Manna, R.; Sar, P.; Kazy, S.K. Genome analysis of crude oil degrading *Franconibacter pulveris* strain DJ34 revealed its genetic basis for hydrocarbon degradation and survival in oil contaminated environment. *Genomics*, **2017**, *109*, 374–382, doi:10.1016/j.ygeno.2017.06.002.
87. Brooijmans, R.J.W.; Pastink, M.I.; Siezen, R.J. Hydrocarbon-degrading bacteria: The oil-spill clean-up crew. *Microb. Biotechnol.* **2009**, *2*(6), 587–594, doi:10.1111/j.1751-7915.2009.00151.x.
88. Rodríguez-Blanco, A.; Vetion, G.; Escande, M.L.; Delille, D.; Ghiglione, J.F. *Gallaecimonas pentaromativorans* gen. nov.; sp. nov.; a bacterium carrying 16S rRNA gene heterogeneity and able to degrade high-molecular-mass polycyclic aromatic hydrocarbons. *Int. J. Syst. Evol. Microbiol.* **2010**, *60*(3), 504–509, doi:10.1099/ijs.0.013532-0.

89. Lavania, M.; Cheema, S.; Sarma, P.M.; Mandal, A.K.; Lal, B. Biodegradation of asphalt by *Garciaella petrolearia* TERIG02 for viscosity reduction of heavy oil. *Biodegradation*, **2012**, 23(1), 15–24, doi:10.1007/s10532-011-9482-0.
90. Weelink, S.A.B.; Van Doesburg, W.; Saia, F.T.; Rijpstra, W.I.C.; Röling, W.F.M.; Smidt, H.; Stams, A.J.M. A strictly anaerobic betaproteobacterium *Georgfuchsia toluolica* gen. nov.; sp. nov. degrades aromatic compounds with Fe(III), Mn(IV) or nitrate as an electron acceptor. *FEMS Microbiol. Ecol.* **2009**, 70(3), 575–585, doi:10.1111/j.1574-6941.2009.00778.x.
91. Sauret, C.; Séverin, T.; Vétion, G.; Guigue, C.; Goutx, M.; Pujo-Pay, M.; Conan, P.; Fagervold, S.K.; Ghiglione, J.F. “Rare biosphere” bacteria as key phenanthrene degraders in coastal seawaters. *Environ. Pollut.* **2014**, 194, 246–253, doi:10.1016/j.envpol.2014.07.024.
92. Tyagi, M.; da Fonseca, M.M.R.; de Carvalho, C.C.C.R. Bioaugmentation and biostimulation strategies to improve the effectiveness of bioremediation processes. *Biodegradation*, **2011**, 22, 231–241, doi:10.1007/s10532-010-9394-4.
93. Iwaki, H.; Yamamoto, T.; Hasegawa, Y. Isolation of marine xylene-utilizing bacteria and characterization of *Halioxenophilus aromaticivorans* gen. nov.; sp. nov. and its xylene degradation gene cluster. *FEMS Microbiol. Lett.* **2018**, 365(7), fny042, doi:10.1093/femsle/fny042.
94. Xu, H.X.; Wu, H.Y.; Qiu, Y.P.; Shi, X.Q.; He, G.H.; Zhang, J.F.; Wu, J.C. Degradation of fluoranthene by a newly isolated strain of *Herbaspirillum chlorophenicum* from activated sludge. *Biodegradation*, **2011**, 22(2), 335–345, doi:10.1007/s10532-010-9403-7.
95. Okai, M.; Kihara, I.; Yokoyama, Y.; Ishida, M.; Urano, N. Isolation and characterization of benzo[a]pyrene-degrading bacteria from the Tokyo Bay area and Tama River in Japan. *FEMS Microbiol. Lett.* **2015**, 362(18), fmv143 doi:10.1093/femsle/fmv143.
96. Kim, S.J.; Park, S.J.; Jung, M.Y.; Kim, J.G.; Madsen, E.L.; Rhee, S.K. An uncultivated nitrate-reducing member of the genus *herminiimonas* degrades toluene. *Appl. Environ. Microbiol.* **2014**, 80(10), 3233–3243, doi:10.1128/AEM.03975-13.
97. Rahul, K.; Azmatunnisa, M.; Sasikala, C.H.; Ramana, C.V. *Hoeflea olei* sp. Nov.; a diesel-oil-degrading, anoxygenic, phototrophic bacterium isolated from backwaters and emended description of the genus *Hoeflea*. *Int. J. Syst. Evol. Microbiol.* **2015**, 65(8), 2403–2409, doi:10.1099/ijs.0.000277.
98. Nie, Y.; Fang, H.; Li, Y.; Chi, C.Q.; Tang, Y.Q.; Wu, X.L. The Genome of the Moderate Halophile *Amycolicoccus subflavus* DQS3-9A1T Reveals Four Alkane Hydroxylation Systems and Provides Some Clues on the Genetic Basis for Its Adaptation to a Petroleum Environment. *PLoS ONE*, **2013**, 8(8), e70986, doi:10.1371/journal.pone.0070986.
99. Palleroni, N.J.; Port, A.M.; Chang, H.K.; Zylstra, G.J. *Hydrocarboniphaga effusa* gen. nov.; sp. nov.; a novel member of the  $\gamma$ -Proteobacteria active in alkane and aromatic hydrocarbon degradation. *Int. J. Syst. Evol. Microbiol.* **2004**, 54(4), 1203–1207, doi:10.1099/ijs.0.03016-0.
100. Fahy, A.; Ball, A.S.; Lethbridge, G.; Timmis, K.N.; McGinity, T.J. Isolation of alkali-tolerant benzene-degrading bacteria from a contaminated aquifer. *Lett. Appl. Microbiol.* **2008**, 47(1), 60–66, doi:10.1111/j.1472-765X.2008.02386.x
101. Ozaki, S.; Kishimoto, N.; Fujita, T. Isolation and Phylogenetic Characterization of Microbial Consortia able to Degrade Aromatic Hydrocarbons at High Rates. *Microbes Environ.* **2006**, 21(1), 44–52, doi:10.1264/jsme2.21.44.
102. Song, W.F.; Wang, J.W.; Yan, Y.C.; An, L.Y.; Zhang, F.; Wang, L.; Xu, Y.; Tian, M.Z.; Nie, Y.; Wu, X.L. Shifts of the indigenous microbial communities from reservoir



- production water in crude oil- and asphaltene-degrading microcosms. *Int. Biodeterior. Biodegradation*, **2018**, 132, 18–29, doi:10.1016/j.ibiod.2018.04.015.
103. Kostka, J.E.; Prakash, O.; Overholt, W.A.; Green, S.J.; Freyer, G.; Canion, A.; Delgadino, J.; Norton, N.; Hazen, T.C.; Huettel, M. Hydrocarbon-degrading bacteria and the bacterial community response in Gulf of Mexico beach sands impacted by the deepwater horizon oil spill. *Appl. Environ. Microbiol.* **2011**, 77(22), 7962–7974, doi:10.1128/AEM.05402-11.
  104. Corteselli, E.M.; Aitken, M.D.; Singleton, D.R. Description of *Immundisolibacter cernigliae* gen. Nov.; sp. nov.; a high-molecular-weight polycyclic aromatic hydrocarbon-degrading bacterium within the class Gammaproteobacteria, and proposal of *Immundisolibacterales* ord. nov. and *Immundisolibacteraceae* fam. nov. *Int. J. Syst. Evol. Microbiol.* **2017**, 67, 925–931, doi:10.1099/ijsem.0.001714.
  105. Al-Awadhi, H.; Sulaiman, R.H.D.; Mahmoud, H.M.; Radwan, S.S. Alkaliphilic and halophilic hydrocarbon-utilizing bacteria from Kuwaiti coasts of the Arabian Gulf. *Appl. Microbiol. Biotechnol.* **2007**, 77(1), 183–186, doi:10.1007/s00253-007-1127-1.
  106. Yamazoe, A.; Yagi, O.; Oyaizu, H. Degradation of polycyclic aromatic hydrocarbons by a newly isolated dibenzofuran-utilizing *Janibacter* sp. strain YY-1. *Appl. Microbiol. Biotechnol.* **2004**, 65(2), 211–218, doi:10.1007/s00253-003-1541-y
  107. Al-Mailem, D.M.; Kansour, M.K.; Radwan, S.S. Hydrocarbonoclastic biofilms based on sewage microorganisms and their application in hydrocarbon removal in liquid wastes. *Can. J. Microbiol.* **2014**, 60(7), 477–486, doi:10.1139/cjm-2014-0214.
  108. Kim, S.H.; Kim, J.G.; Jung, M.Y.; Kim, S.J.; Gwak, J.H.; Yu, W.J.; Roh, S.W.; Kim, Y.H.; Rhee, S.K. *Ketobacter alkanivorans* gen. Nov.; sp. nov.; an n-alkane-degrading bacterium isolated from seawater. *Int. J. Syst. Evol. Microbiol.* **2018**, 68(7), 2258–2264, doi:10.1099/ijsem.0.002823.
  109. Peña-Montenegro, T.D.; Kleindienst, S.; Allen, A.E.; Eren, A.M.; McCrow, J.P.; Sánchez-Calderón, J.D.; Arnold, J.; Joye, S.B. *Colwellia* and *Marinobacter* metapangenomes reveal species-specific responses to oil and dispersant exposure in deepsea microbial communities. *BioRxiv*, **2020**, doi:10.1101/2020.09.28.317438.
  110. Kwon, K.K.; Lee, H.S.; Yang, S.H.; Kim, S.J. *Kordiimonas gwangyangensis* gen. nov.; sp. nov.; a marine bacterium isolated from marine sediments that forms a distinct lineage (*Kordiimonadales* ord. nov.) in the “Alphaproteobacteria.” *Int. J. Syst. Evol. Microbiol.* **2005**, 55(5), 2033–2037, doi:10.1099/ijms.0.63684-0.
  111. Bisht, S.; Pandey, P.; Sood, A.; Sharma, S.; Bisht, N.S. Biodegradation of naphthalene and anthracene by chemo-tactically active rhizobacteria of *Populus deltoides*. *Braz. J. Microbiol.* **2010**, 41(4), 922–930, doi:10.1590/S1517-83822010000400011.
  112. Al-Saleh, E.; Drobia, H.; Obuekwe, C. Predominant culturable crude oil-degrading bacteria in the coast of Kuwait. *Int. Biodeterior. Biodegradation*, **2009**, 63(4), 400–406, doi:10.1016/j.ibiod.2008.11.004.
  113. Floodgate, G.D. The fate of petroleum in marine ecosystems. In *Petroleum microbiology*. Macmillan, New York, **1984**, pp 355–397.
  114. Sarma, P.M.; Bhattacharya, D.; Krishnan, S.; Lal, B. Degradation of polycyclic aromatic hydrocarbons by a newly discovered enteric bacterium, *Leclercia adecarboxylata*. *Appl. Environ. Microbiol.* **2004**, 70(5), 3163–3166, doi:10.1128/AEM.70.5.3163-3166.2004.
  115. Zhang, S.; Wang, Q.; Xie, S. Stable isotope probing identifies anthracene degraders under methanogenic conditions. *Biodegradation*, **2012**, 23(2), 221–230, doi:10.1007/s10532-011-9501-1.
  116. Muangchinda, C.; Pansri, R.; Wongwongsee, W.; Pinyakong, O. Assessment of polycyclic aromatic hydrocarbon biodegradation potential in mangrove sediment from Don Hoi Lot,

- Samut Songkram Province, Thailand. *J. Appl. Microbiol.* **2013**, *114*(5), 1311–1324, doi:10.1111/jam.12128.
117. Ke, C.Y.; Sun, W.J.; Li, Y.B.; Lu, G.M.; Zhang, Q.Z.; Zhang, X.L. Microbial enhanced oil recovery in Baolige Oilfield using an indigenous facultative anaerobic strain *Luteimonas huabeiensis* sp. nov. *J. Pet. Sci. Eng.* **2018**, *167*, 160–167, doi:10.1016/j.petrol.2018.04.015.
  118. Maeda, R.; Nagashima, H.; Zulkharnain, A.B.; Iwata, K.; Omori, T. Isolation and characterization of a car gene cluster from the naphthalene, phenanthrene, and carbazole-degrading marine isolate *Lysobacter* sp. strain OC7. *Curr. Microbiol.* **2009**, *59*(2), 154–159, doi:10.1007/s00284-009-9414-y.
  119. Yuan, J.; Lai, Q.; Sun, F.; Zheng, T.; Shao, Z. The diversity of PAH-degrading bacteria in a deep-sea water column above the southwest Indian ridge. *Front. Microbiol.* **2015**, *6*, doi:10.3389/fmicb.2015.00853.
  120. Seth-Smith, H. “Slick” operation. *Nat. Rev. Microbiol.* **2010**, *8*, 538, doi:10.1038/nrmicro2407.
  121. Pham, V.D.; Hnatow, L.L.; Zhang, S.; Fallon, R.D.; Jackson, S.C.; Tomb, J.F.; DeLong, E.F.; Keeler, S.J. Characterizing microbial diversity in production water from an Alaskan mesothermic petroleum reservoir with two independent molecular methods. *Environ. Microbiol.* **2009**, *11*(1), 176–187, doi:10.1111/j.1462-2920.2008.01751.x.
  122. Schreiber, L.; Fortin, N.; Tremblay, J.; Wasserscheid, J.; Sanschagrin, S.; Mason, J.; Wright, C.A.; Spear, D.; Johannessen, S.C.; Robinson, B.; et al. In situ microcosms deployed at the coast of British Columbia (Canada) to study dilbit weathering and associated microbial communities under marine conditions. *FEMS Microbiol. Ecol.* **2021**, *97*(7), doi:10.1093/femsec/fiab082.
  123. Green, D.H.; Echavarri-Bravo, V.; Brennan, D.; Hart, M.C. Bacterial diversity associated with the coccolithophorid algae *emiliana huxleyi* and *coccolithus pelagicus* f. *braarudii*. *BioMed Res. Int.* **2015**, *2015*, 194540, doi:10.1155/2015/194540.
  124. Feng, T.C.; Cui, C.Z.; Dong, F.; Feng, Y.Y.; Liu, Y.D.; Yang, X.M. Phenanthrene biodegradation by halophilic *Marteella* sp. AD-3. *J. Appl. Microbiol.* **2012**, *113*(4), 779–789, doi:10.1111/j.1365-2672.2012.05386.x.
  125. Narro, M.L.; Cerniglia, C.E.; Van Baalen, C.; Gibson, D.T. Metabolism of phenanthrene by the marine cyanobacterium *Agmenellum quadruplicatum* PR-6. *Appl. Environ. Microbiol.* **1992**, *58*(4), 1351–1359, doi:10.1128/aem.58.4.1351-1359.1992.
  126. Nakatsu, C.H.; Hristova, K.; Hanada, S.; Meng, X.Y.; Hanson, J.R.; Scow, K.M.; Kamagata, Y. *Methylobium petroleiphilum* gen. nov.; sp. nov.; a novel methyl tert-butyl ether-degrading methylotroph of the Betaproteobacteria. *Int. J. Syst. Evol. Microbiol.* **2006**, *56*(5), 983–989, doi:10.1099/ijs.0.63524-0.
  127. Kalyuzhnaya, M.G.; De Marco, P.; Bowerman, S.; Pacheco, C.C.; Lara, J.C.; Lidstrom, M.E.; Chistoserdova, L. *Methyloversatilis universalis* gen. nov.; sp. nov.; a novel taxon within the Betaproteobacteria represented by three methylotrophic isolates. *Int. J. Syst. Evol. Microbiol.* **2006**, *56*(11), 2517–2522, doi:10.1099/ijs.0.64422-0.
  128. Simarro, R.; González, N.; Bautista, L.F.; Molina, M.C. Assessment of the efficiency of in situ bioremediation techniques in a creosote polluted soil: Change in bacterial community. *J. Hazard. Mater.* **2013**, *262*, 158–167, doi:10.1016/j.jhazmat.2013.08.025.
  129. Stucki, G.; Alexander, M. Role of dissolution rate and solubility in biodegradation of aromatic compounds. *Appl. Environ. Microbiol.* **1987**, *53*(2), 292–297, doi:10.1128/aem.53.2.292-297.1987.
  130. Bergmann, F.; Selesi, D.; Weinmaier, T.; Tischler, P.; Rattei, T.; Meckenstock, R.U. Genomic insights into the metabolic potential of the polycyclic aromatic hydrocarbon

- degrading sulfate-reducing Deltaproteobacterium N47. *Environ. Microbiol.* **2011**, 13(5), 1125–1137, doi:10.1111/j.1462-2920.2010.02391.x.
131. Nagashima, H.; Zulkharnain, A.B.; Maeda, R.; Fuse, H.; Iwata, K.; Omori, T. Cloning and Nucleotide Sequences of Carbazole Degradation Genes from Marine Bacterium *Neptuniibacter* sp. Strain CAR-SF. *Curr. Microbiol.* **2010**, 61(1), 50–56, doi:10.1007/s00284-009-9575-8.
  132. Juteau, P.; Larocque, R.; Rho, D.; LeDuy, A. Analysis of the relative abundance of different types of bacteria capable of toluene degradation in a compost biofilter. *Appl. Microbiol. Biotechnol.* **1999**, 52(6), 863–868, doi:10.1007/s002530051604.
  133. Dixit, V.S.; Pant, A. Hydrocarbon degradation and protease production by *Nocardiopsis* sp. NCIM 5124. *Lett. Appl. Microbiol.* **2000**, 30(1), 67–69, doi:10.1046/j.1472-765x.2000.00665.x.
  134. Cerniglia, C.E. Biodegradation of polycyclic aromatic hydrocarbons. *Biodegradation*, **1992**, 3(2–3), 351–368, doi:10.1007/BF00129093.
  135. Lai, Q.; Yuan, J.; Wu, C.; Shao, Z. *Oceanibaculum indicum* gen. nov.; sp. nov.; isolated from deep seawater of the Indian Ocean. *Int. J. Syst. Evol. Microbiol.* **2009**, 59(7), 1733–1737, doi:10.1099/ijs.0.004341-0.
  136. Hassanshahian, M.; Boroujeni, N.A. Enrichment and identification of naphthalene-degrading bacteria from the Persian Gulf. *Mar. Pollut. Bull.* **2016**, 107(1), 59–65, doi:10.1016/j.marpolbul.2016.04.020.
  137. Gao, X.; Gao, W.; Cui, Z.; Han, B.; Yang, P.; Sun, C.; Zheng, L. Biodiversity and degradation potential of oil-degrading bacteria isolated from deep-sea sediments of South Mid-Atlantic Ridge. *Mar. Pollut. Bull.* **2015**, 97(1–2), 373–380, doi:10.1016/j.marpolbul.2015.05.065.
  138. Buzoleva, L.S.; Bogatyrenko, E.A.; Repina, M.A.; Belkova, N.L. Oil-oxidizing activity of bacteria isolated from south Sakhalin coastal waters. *Microbiology (Russian Federation)*, **2017**, 86(3), 338–345, doi:10.1134/S0026261717030043.
  139. Fang, T.; Wang, H.; Huang, Y.; Zhou, H.; Dong, P. *Oleiagrimonas soli* gen. nov.; sp. nov.; a genome-sequenced gammaproteobacterium isolated from an oilfield. *Int. J. Syst. Evol. Microbiol.* **2015**, 65(5), 1666–1671, doi:10.1099/ijs.0.000158.
  140. Teramoto, M.; Ohuchi, M.; Hatmanti, A.; Darmayati, Y.; Widyastuti, Y.; Harayama, S.; Fukunaga, Y. *Oleibacter marinus* gen. nov.; sp. nov.; a bacterium that degrades petroleum aliphatic hydrocarbons in a tropical marine environment. *Int. J. Syst. Evol. Microbiol.* **2011**, 61(2), 375–380, doi:10.1099/ijs.0.018671-0.
  141. Yakimov, M.M.; Giuliano, L.; Gentile, G.; Crisafi, E.; Chernikova, T.N.; Abraham, W.R.; Lünsdorf, H.; Timmis, K.N.; Golyshin, P.N. *Oleispira antarctica* gen. nov.; sp. nov.; a novel hydrocarbonoclastic marine bacterium isolated from Antarctic coastal sea water. *Int. J. Syst. Evol. Microbiol.* **2003**, 53(3), 779–785, doi:10.1099/ijs.0.02366-0.
  142. Kanamori, T.; Rashid, N.; Morikawa, M.; Atomi, H.; Imanaka, T. *Oleomonas sagaranensis* gen. nov.; sp. nov.; represents a novel genus in the  $\alpha$ -Proteobacteria. *FEMS Microbiol. Lett.* **2002**, 217(2), 255–261, doi:10.1016/S0378-1097(02)01089-3.
  143. Ntougias, S.; Melidis, P.; Navrozidou, E.; Tzegkas, F. Diversity and efficiency of anthracene-degrading bacteria isolated from a denitrifying activated sludge system treating municipal wastewater. *Int. Biodeterior. Biodegradation*, **2015**, 97, 151–158, doi:10.1016/j.ibiod.2014.11.009.
  144. Obuekwe, C.O.; Al-Jadi, Z.K.; Al-Saleh, E.S. Hydrocarbon degradation in relation to cell-surface hydrophobicity among bacterial hydrocarbon degraders from petroleum-contaminated Kuwait desert environment. *Int. Biodeterior. Biodegradation*, **2009**, 63(3), 273–279, doi:10.1016/j.ibiod.2008.10.004.

145. Lee, Y.; Jeon, C.O. *Paraburkholderia aromaticivorans* sp. nov.; an aromatic hydrocarbon-degrading bacterium, isolated from gasoline-contaminated soil. *Int. J. Syst. Evol. Microbiol.* **2018**, *68*(4), 1251–1257, doi:10.1099/ijsem.0.002661.
146. Teng, Y.; Luo, Y.; Sun, M.; Liu, Z.; Li, Z.; Christie, P. Effect of bioaugmentation by *Paracoccus* sp. strain HPD-2 on the soil microbial community and removal of polycyclic aromatic hydrocarbons from an aged contaminated soil. *Bioresour. Technol.* **2010**, *101*(10), 3437–3443, doi:10.1016/j.biortech.2009.12.088.
147. Wang, C.; Huang, Y.; Zhang, Z.; Hao, H.; Wang, H. Absence of the nahG-like gene caused the syntrophic interaction between *Marinobacter* and other microbes in PAH-degrading process. *J. Hazard. Mater.* **2020**, *384*, doi:10.1016/j.jhazmat.2019.121387.
148. Schleheck, D.; Tindall, B.J.; Rosselló-Mora, R.; Cook, A.M. *Parvibaculum lavamentivorans* gen. nov.; sp. nov.; a novel heterotroph that initiates catabolism of linear alkylbenzenesulfonate. *Int. J. Syst. Evol. Microbiol.* **2004**, *54*(5), 1489–1497, doi:10.1099/ijse.0.03020-0.
149. Šepie, E.; Briceľj, M.; Leskovšek, H. Biodegradation studies of polyaromatic hydrocarbons in aqueous media. *J. Appl. Microbiol.* **1997**, *83*(5), 561–568, doi:10.1046/j.1365-2672.1997.00261.x.
150. Cai, P.; Cai, P.; Cai, P.; Ning, Z.; Ning, Z.; Liu, Y.; He, Z.; He, Z.; Shi, J.; Niu, M. Diagnosing bioremediation of crude oil-contaminated soil and related geochemical processes at the field scale through microbial community and functional genes. *Ann. Microbiol.* **2020**, *70*(1), doi:10.1186/s13213-020-01580-x.
151. Schink, B. Fermentation of acetylene by an obligate anaerobe, *Pelobacter acetylenicus* sp. nov. *Arch. Microbiol.* **1985**, *142*(3), 295–301, doi:10.1007/BF00693407.
152. Viggø, S.; Jøesaar, M.; Vedler, E.; Kiiker, R.; Pärnpuu, L.; Heinaru, A. Occurrence of diverse alkane hydroxylase alkB genes in indigenous oil-degrading bacteria of Baltic Sea surface water. *Mar. Pollut. Bull.* **2015**, *101*(2), 507–516, doi:10.1016/j.marpolbul.2015.10.064.
153. Al-Hasan, R.H.; Al-Bader, D.A.; Sorkhoh, N.A.; Radwan, S.S. Evidence for n-alkane consumption and oxidation by filamentous cyanobacteria from oil-contaminated coasts of the Arabian Gulf. *Mar. Biol.* **1998**, *130*(3), 521–527, doi:10.1007/s002270050272.
154. Li, H.; Liu, Y.H.; Luo, N.; Zhang, X.Y.; Luan, T.G.; Hu, J.M.; Wang, Z.Y.; Wu, P.C.; Chen, M.J.; Lu, J.Q. Biodegradation of benzene and its derivatives by a psychrotolerant and moderately haloalkaliphilic *Planococcus* sp. strain ZD22. *Res. Microbiol.* **2006**, *157*(7), 629–636, doi:10.1016/j.resmic.2006.01.002.
155. Radwan, S.S.; Khanafer, M.M.; Al-Awadhi, H.A. Ability of the so-called obligate hydrocarbonoclastic bacteria to utilize nonhydrocarbon substrates thus enhancing their activities despite their misleading name. *BMC Microbiol.* **2019**, *19*(1), doi:10.1186/s12866-019-1406-x.
156. Jeon, C.O.; Park, W.; Ghiorse, W.C.; Madsen, E.L. *Polaromonas naphthalenivorans* sp. nov.; a naphthalene-degrading bacterium from naphthalene-contaminated sediment. *Int. J. Syst. Evol. Microbiol.* **2004**, *54*(1), 93–97, doi:10.1099/ijse.0.02636-0.
157. Nie, Y.; Tang, Y.Q.; Li, Y.; Chi, C.Q.; Cai, M.; Wu, X.L. The genome sequence of *polymorphum gilvum* SL003B-26A1 T reveals its genetic basis for crude oil degradation and adaptation to the saline soil. *PLoS ONE*, **2012**, *7*(2), e31261, doi:10.1371/journal.pone.0031261.
158. Gauthier, E.; Déziel, E.; Villemur, R.; Juteau, P.; Lépine, F.; Beaudet, R. Initial characterization of new bacteria degrading high-molecular weight polycyclic aromatic hydrocarbons isolated from a 2-year enrichment in a two-liquid-phase culture system. *J. Appl. Microbiol.* **2003**, *94*(2), 301–311, doi:10.1046/j.1365-2672.2003.01835.x.

159. Almutairi, A. *Prauserella soli* sp. nov.; isolated from crude oil-contaminated soil. *Int. J. Syst. Evol. Microbiol.* **2015**, 65(9), 3060–3065, doi:10.1099/ijs.0.000378.
160. Cao, Y.; Chastain, R.A.; Elo, E.A.; Nogi, Y.; Kato, C.; Bartletta, D.H. Novel psychropiezophilic oceanospirillales species *profundimonas piezophila* gen. nov.; sp. nov.; isolated from the deep-sea environment of the puerto rico trench. *Appl. Environ. Microbiol.* **2014**, 80(1), 54–60, doi:10.1128/AEM.02288-13.
161. Kim, J.M.; Le, N.T.; Chung, B.S.; Park, J.H.; Bae, J.W.; Madsen, E.L.; Jeon, C.O. Influence of soil components on the biodegradation of benzene, toluene, ethylbenzene, and o-, m-, and p-xylenes by the newly isolated bacterium *Pseudoxanthomonas spadix* BD-a59. *Appl. Environ. Microbiol.* **2008**, 74(23), 7313–7320, doi:10.1128/AEM.01695-08.
162. Pham, V.H.T.; Jeong, S.W.; Kim, J. *Psychrobacillus soli* sp. nov.; capable of degrading oil, isolated from oil-contaminated soil. *Int. J. Syst. Evol. Microbiol.* **2015**, 65(9), 3046–3052, doi:10.1099/ijs.0.000375.
163. Cao, B.; Ma, T.; Ren, Y.; Ren, Y.; Li, G.; Li, P.; Guo, X.; Ding, P.; Feng, L. Complete genome sequence of *Pusillimonas* sp. T7-7, a cold-tolerant diesel oil-degrading bacterium isolated from the Bohai sea in China. *J. Bacteriol.* **2011**, 193(15), 4021–4022, doi:10.1128/JB.05242-11.
164. Ma, Y.; Wang, L.; Shao, Z. *Pseudomonas*, the dominant polycyclic aromatic hydrocarbon-degrading bacteria isolated from Antarctic soils and the role of large plasmids in horizontal gene transfer. *Environ. Microbiol.* **2006**, 8(3), 455–465, doi:10.1111/j.1462-2920.2005.00911.x.
165. Parales, R.E.; Ditty, J.L.; Harwood, C.S. Toluene-degrading bacteria are chemotactic towards the environmental pollutants benzene, toluene, and trichloroethylene. *Appl. Environ. Microbiol.* **2000**, 66(9), 4098–4104, doi:10.1128/AEM.66.9.4098-4104.2000.
166. Xie, S.; Sun, W.; Luo, C.; Cupples, A.M. Stable isotope probing identifies novel m-xylene degraders in soil microcosms from contaminated and uncontaminated sites. *Water, Air, Soil Pollut.* **2010**, 212(1–4), 113–122, doi:10.1007/s11270-010-0326-z.
167. Kanaly, R.A.; Harayama, S.; Watanabe, K. *Rhodanobacter* sp. strain BPC1 in a benzo[a]pyrene-mineralizing bacterial consortium. *Appl. Environ. Microbiol.* **2002**, 68(12), 5826–5833, doi:10.1128/AEM.68.12.5826-5833.2002.
168. Crisafi, F.; Giuliano, L.; Yakimov, M.M.; Azzaro, M.; Denaro, R. Isolation and degradation potential of a cold-adapted oil/PAH-degrading marine bacterial consortium from Kongsfjorden (Arctic region). *Rend. Lincei.* **2016**, 27, 261–270, doi:10.1007/s12210-016-0550-6.
169. Eriksson, S.; Ankner, T.; Abrahamsson, K.; Hallbeck, L. Propylphenols are metabolites in the anaerobic biodegradation of propylbenzene under iron-reducing conditions. *Biodegradation*, **2005**, 16(3), 253–263, doi:10.1007/s10532-004-1278-z.
170. Ruiz, O.N.; Brown, L.M.; Striebich, R.C.; Smart, C.E.; Bowen, L.L.; Lee, J.S.; Little, B.J.; Mueller, S.S.; Gunasekera, T.S. Effect of Conventional and Alternative Fuels on a Marine Bacterial Community and the Significance to Bioremediation. *Energy Fuels*, **2016**, 30, 434–444, doi:10.1021/acs.energyfuels.5b02439.
171. Buchan, A.; González, J.M.; Chua, M.J. Aerobic Hydrocarbon-Degrading Alphaproteobacteria: Rhodobacteraceae (Roseobacter). In *Taxonomy, Genomics and Ecophysiology of Hydrocarbon-Degrading Microbes*. Springer International Publishing, **2019**, pp. 1–13, doi:10.1007/978-3-319-60053-6\_8-1.
172. Chronopoulou, P. M.; Sanni, G. O.; Silas-Olu, D. I.; van der Meer, J. R.; Timmis, K. N.; Brussaard, C. P. D.; McGenety, T. J. Generalist hydrocarbon-degrading bacterial communities in the oil-polluted water column of the North Sea. *Microb. Biotechnol.* **2015**, 8(3), 434–447, doi:10.1111/1751-7915.12176.

173. Corteselli, E.M.; Aitken, M.D.; Singleton, D.R. *Rugosibacter aromaticivorans* gen. Nov.; sp. nov.; a bacterium within the family Rhodocyclaceae, isolated from contaminated soil, capable of degrading aromatic compounds. *Int. J. Syst. Evol. Microbiol.* **2017**, *67*(2), 311–318, doi:10.1099/ijsem.0.001622.
174. Hu, Y.T.; Zou, P.J.; Zhou, Y.G.; Liu, Z.H.; Liu, S.J. *Saccharothrix xinjiangensis* sp. nov.; a pyrene-degrading actinomycete isolated from Tianchi Lake, Xinjiang, China. *Int. J. Syst. Evol. Microbiol.* **2004**, *54*(6), 2091–2094, doi:10.1099/ijms.0.63143-0.
175. Anan'ina, L.N.; Plotnikova, E.G.; Gavrish, E.Y.; Demakov, V.A.; Evtushenko, L.I. *Salinicola socius* gen. nov.; sp. nov.; a moderately halophilic bacterium from a naphthalene-utilizing microbial association. *Microbiology*, **2007**, *76*(3), 324–330, doi:10.1134/S0026261707030095.
176. Wang, L.; Wang, W.; Lai, Q.; Shao, Z. Gene diversity of CYP153A and AlkB alkane hydroxylases in oil-degrading bacteria isolated from the Atlantic Ocean. *Environ. Microbiol.* **2010**, *12*(5), 1230–1242, doi:10.1111/j.1462-2920.2010.02165.x.
177. Adachi, K.; Katsuta, A.; Matsuda, S.; Peng, X.; Misawa, N.; Shizuri, Y.; Kroppenstedt, R.M.; Yokota, A.; Kasai, H. *Smaragdicooccus niigatensis* gen. nov.; sp. nov.; a novel member of the suborder Corynebacterineae. *Int. J. Syst. Evol. Microbiol.* **2007**, *57*(2), 297–301, doi:10.1099/ijms.0.64254-0.
178. Austin, B.; Calomiris, J.J.; Walker, J.D.; Colwell, R.R. Numerical taxonomy and ecology of petroleum degrading bacteria. *Appl. Environ. Microbiol.* **1977**, *34*(1), 60–68, doi:10.1128/aem.34.1.60-68.1977.
179. Laroe, S.L.; Wang, B.; Han, J.I. Isolation and characterization of a novel polycyclic aromatic hydrocarbon-degrading bacterium, *sphingopyxis* sp. strain M2R2, capable of passive spreading motility through soil. *Environ. Eng. Sci.* **2010**, *27*(6), 505–512, doi:10.1089/ees.2010.0054.
180. Jeong, H.I.; Jin, H.M.; Jeon, C.O. Complete genome sequence of *Sphingorhabdus* sp. M41, a versatile hydrocarbon degrader, isolated from crude oil-contaminated coastal sediment. *J. Biotechnol.* **2016**, *227*, 41–42, doi:10.1016/j.jbiotec.2016.04.016.
181. Rathore, D.S.; Sheikh, M.; Singh, S.P. Marine Actinobacteria: New Horizons in Bioremediation. In *Recent Developments in Microbial Technologies*. Springer Nature Singapore, **2021**, pp. 425–449, doi:10.1007/978-981-15-4439-2\_20.
182. Iida, T.; Mukouzaka, Y.; Nakamura, K.; Kudo, T. Plasmid-borne genes code for an angular dioxygenase involved in dibenzofuran degradation by *Terrabacter* sp. Strain YK3. *Appl. Environ. Microbiol.* **2002**, *68*(8), 3716–3723, doi:10.1128/AEM.68.8.3716-3723.2002.
183. Song, M.; Luo, C.; Jiang, L.; Zhang, D.; Wang, Y.; Zhang, G. Identification of Benzo[a]pyrene-metabolizing bacteria in forest soils by using DNA-based stable-isotope probing. *Appl. Environ. Microbiol.* **2015**, *81*(21), 7368–7376, doi:10.1128/AEM.01983-15.
184. Rodrigo-Torres, L.; Pujalte, M.J.; Arahal, D.R. Draft genome sequence of *Thalassobius gelatinovorus* CECT 4357T, a roseobacter with the potential ability to degrade polycyclic aromatic hydrocarbons. *Gene Rep.* **2017**, *9*, 32–36, doi:10.1016/j.genrep.2017.08.005.
185. Yakimov, M.M.; Giuliano, L.; Denaro, R.; Crisafi, E.; Chernikova, T.N.; Abraham, W.R.; Luensdorf, H.; Timmis, K.N.; Golyshin, P.N. *Thalassolituus oleivorans* gen. nov.; sp. nov.; a novel marine bacterium that obligately utilizes hydrocarbons. *Int. J. Syst. Evol. Microbiol.* **2004**, *54*, 141–148, doi:10.1099/ijms.0.02424-0.
186. Zarilla, K.A.; Perry, J.J. *Thermoleophilum album* gen. nov. and sp. nov.; a bacterium obligate for thermophily and n-alkane substrates. *Arch. Microbiol.* **1984**, *137*(4), 286–290, doi:10.1007/BF00410723.

187. Feitkenhauer, H.; Müller, R.; Märkl, H. Degradation of polycyclic aromatic hydrocarbons and long chain alkanes at 60–70 °C by *Thermus* and *Bacillus* spp. *Biodegradation*, **2003**, *14*(6), 367–372, doi:10.1023/A:1027357615649.
188. Kuppusamy, S.; Thavamani, P.; Megharaj, M.; Lee, Y.B.; Naidu, R. Kinetics of PAH degradation by a new acid-metal-tolerant *Trabulsella* isolated from the MGP site soil and identification of its potential to fix nitrogen and solubilize phosphorous. *J. Hazard. Mater.* **2016**, *307*, 99–107, doi:10.1016/j.jhazmat.2015.12.068.
189. Harwati, T.U.; Kasai, Y.; Kodama, Y.; Susilaningih, D.; Watanabe, K. *Tropicimonas* isoalkanivorans gen. nov.; sp. nov.; a branched-alkane-degrading bacterium isolated from Semarang Port in Indonesia. *Int. J. Syst. Evol. Microbiol.* **2009**, *59*(2), 388–391, doi:10.1099/ijs.0.65822-0.
190. Hassanshahian, M.; Ahmadinejad, M.; Tebyanian, H.; Kariminik, A. Isolation and characterization of alkane degrading bacteria from petroleum reservoir waste water in Iran (Kerman and Tehran provenances). *Mar. Pollut. Bull.* **2013**, *73*(1), 300–305, doi:10.1016/j.marpolbul.2013.05.002.
191. Campeão, M.E.; Swings, J.; Silva, B.S.; Otsuki, K.; Thompson, F.L.; Thompson, C.C. “*Candidatus Colwellia aromaticivorans*” sp. nov.; “*Candidatus Halocytiibacter alkanivorans*” sp. nov.; and “*Candidatus Ulvibacter alkanivorans*” sp. nov. Genome Sequences. *Microbiol. Resour. Announc.* **2019**, *8*(15), doi:10.1128/mra.00086-19.
192. Posman, K.M.; DeRito, C.M.; Madsen, E.L. Benzene degradation by a *Variovorax* species within a coal tar-contaminated groundwater microbial community. *Appl. Environ. Microbiol.* **2017**, *83*(4), e02658–e02616, doi:10.1128/AEM.02658-16.
193. Hedlund, B.P.; Staley, J.T. *Vibrio cyclotrophicus* sp. nov.; a polycyclic aromatic hydrocarbon (PAH)-degrading marine bacterium. *Int. J. Syst. Evol. Microbiol.* **2001**, *51*(1), 61–66, doi:10.1099/00207713-51-1-61.
194. Yuste, L.; Corbella, M.E.; Turiégano, M.J.; Karlson, U.; Puyet, A.; Rojo, F. Characterization of bacterial strains able to grow on high molecular mass residues from crude oil processing. *FEMS Microbiol. Ecol.* **2000**, *32*(1), 69–75, doi:10.1016/S0168-6496(00)00015-5.
195. Padden, A.N.; Rainey, F.A.; Kelly, D.P.; Wood, A.P. *Xanthobacter tagetidis* sp. nov.; an organism associated with *Tagetes* species and able to grow on substituted thiophenes. *Int. J. Syst. Bacteriol.* **1997**, *47*(2), 394–401, doi:10.1099/00207713-47-2-394.
196. Rochman, F.F.; Sheremet, A.; Tamas, I.; Saidi-Mehrabad, A.; Kim, J.J.; Dong, X.; Sensen, C.W.; Gieg, L.M.; Dunfield, P.F. Benzene and naphthalene degrading bacterial communities in an oil sands tailings pond. *Front. Microbiol.* **2017**, *8*, 1845, doi:10.3389/fmicb.2017.01845.
197. Naysim, L.O.; Kang, H.J.; Jeon, C.O. *Zhongshania aliphaticivorans* sp. nov.; an aliphatic hydrocarbon-degrading bacterium isolated from marine sediment, And transfer of *Spongiibacter borealis* Jang et al. 2011 to the genus *Zhongshania* as *Zhongshania borealis* comb. nov. *Int. J. Syst. Evol. Microbiol.* **2014**, *64*, 3768–3774, doi:10.1099/ijs.0.068593-0.
198. Lee, D.W.; Lee, H.; Kwon, B.O.; Khim, J.S.; Yim, U.H.; Park, H.; Park, B.; Choi, I.G.; Kim, B.S.; Kim, J.J. *Zobellella maritima* sp. Nov.; a polycyclic aromatic hydrocarbon-degrading bacterium, isolated from beach sediment. *Int. J. Syst. Evol. Microbiol.* **2018**, *68*(7), 2279–2284, doi:10.1099/ijsem.0.002825.
199. Farkas, M.; Táncsics, A.; Kriszt, B.; Benedek, T.; Tóth, E.M.; Kéki, Z.; Veres, P.G.; Szoboszlai, S. *Zoogloea oleivorans* sp. nov.; a floc-forming, petroleum hydrocarbon-degrading bacterium isolated from biofilm. *Int. J. Syst. Evol. Microbiol.* **2015**, *65*(1), 274–279, doi:10.1099/ijs.0.068486-0.

200. Shao, R.; Lai, Q.; Liu, X.; Sun, F.; Du, Y.; Li, G.; Shao, Z. *Zunongwangia atlantica* sp. nov.; isolated from deep-sea water. *Int. J. Syst. Evol. Microbiol.* **2014**, *64*, 16–20, doi:10.1099/ijss.0.054007-0.
201. Krzmarzick, M.J.; Taylor, D.K.; Fu, X.; McCutchan, A.L. Diversity and niche of archaea in bioremediation. *Archaea*, **2018**, *3*, 3194108, doi:10.1155/2018/3194108.
202. Zhao, D.; Kumar, S.; Zhou, J.; Wang, R.; Li, M.; Xiang, H. Isolation and complete genome sequence of *Halorientalis hydrocarbonoclasticus* sp. nov.; a hydrocarbon-degrading haloarchaeon. *Extremophiles*, **2017**, *21*(6), 1081–1090, doi:10.1007/s00792-017-0968-5.
203. Kebbouche-Gana, S.; Gana, M.L.; Khemili, S.; Fazouane-Naimi, F.; Bouanane, N.A.; Penninckx, M.; Hacene, H. Isolation and characterization of halophilic Archaea able to produce biosurfactants. *J. Ind. Microbiol. Biotechnol.* **2009**, *36*(5), 727–738, doi:10.1007/s10295-009-0545-8.
204. Selim, S.A.; El-Alfy, S.M.; Hagagy, N.I.; Hassanin, A.A.I.; Khattab, R.M.; El-Meleigy, E.S.A.; Abdel Aziz, M.H.; Maugeri, T.L. Oil-biodegradation and biosurfactant production by haloalkaliphilic Archaea isolated from Soda lakes of the Wadi An Natrun, Egypt. *J. Pure Appl. Microbiol.* **2012**, *6*(3), 1011–1020.
205. Postec, A.; Ollivier, B.; Fardeau, M.L. Objection to the proposition of the new genus *Abyssivirga*. *Int. J. of Syst. Evol. Microbiol.* **2017**, *67*, 174–174, doi:10.1099/ijsem.0.001601.
